# Supplementary material for: Catalytic asymmetric allylation of aldehydes with alkenes through allylic C(sp3)–H functionalization mediated by organophotoredox and chiral chromium hybrid catalysis
Source: Chem Sci. 2019 Jan 17;10(12):3459–65. doi: 10.1039/c8sc05677c (PMC6430092; doi:10.1039/c8sc05677c)
Supplement: Supplementary file 1 [file SC-010-C8SC05677C-s001.pdf]

## *Supporting Information*

### Catalytic Asymmetric Allylation of Aldehydes with Alkenes through Allylic C(sp<sup>3</sup>)-H Functionalization Mediated by Organophotoredox and Chiral Chromium Hybrid Catalysis

Harunobu Mitsunuma,<sup>\*,†</sup> Shun Tanabe,<sup>†</sup> Hiromu Fuse,<sup>†</sup> Kei Ohkubo,<sup>‡</sup> and Motomu Kanai<sup>\*,†</sup>

<sup>†</sup>Graduate School of Pharmaceutical Sciences, The University of Tokyo, Tokyo 113-0033, Japan

<sup>‡</sup>Institute for Advanced Co-Creation Studies and Open and Transdisciplinary Research Initiatives, Osaka University, Osaka 565-0871, Japan

\*e-mail: h-mitsunuma@mol.f.u-tokyo.ac.jp; kanai@mol.f.u-tokyo.ac.jp

#### **Contents**

1. General Method
2. Preparation of Catalysts and Substrates
3. General Procedure for Catalytic Asymmetric Allylation of Aldehydes
4. Optimization Study for Aliphatic Aldehydes
5. Mechanistic Study
6. References
7. NMR Charts

## 1. General Method

$^1\text{H}$  NMR spectra were recorded on JEOL ECX500 (500 MHz for  $^1\text{H}$  NMR and 125.65 MHz for  $^{13}\text{C}$  NMR), and JEOL ECS400 (400 MHz for  $^1\text{H}$  NMR and 100 MHz for  $^{13}\text{C}$  NMR, and 370 MHz for  $^{19}\text{F}$  NMR) spectrometer. For  $^1\text{H}$  NMR and  $^{13}\text{C}$  NMR, chemical shifts were reported in the scale relative to  $\text{CDCl}_3$  ( $\delta = 7.26$  for  $^1\text{H}$  NMR and  $\delta = 77.0$  for  $^{13}\text{C}$  NMR) used as an internal reference. Electrospray ionization (ESI)-mass spectra were measured on a JEOL JMS-T100LC AccuTOF spectrometer for HRMS. DART-mass spectra were measured on a JEOL JMS-T100LC AccuTOF spectrometer. Infrared (IR) spectra were recorded on a JASCO FT/IR 410 Fourier transform infrared spectrophotometer. The enantiomeric excess (ee) was determined by HPLC analysis (JASCO HPLC systems; pump: PU-986; detector: UV-2075, measured at 210 nm or 254 nm; column: CHIRALPAK IA3, IBN3, IC3, IF3). Optical rotations were measured on a JASCO P-1010 polarimeter. Column chromatographies were performed with silica gel Merck 60 (230-400 mesh ASTM), Biotage Isolera One and Biotage SNAP Ultra, or Yamazen Smart Flash and Universal Column Premium. All non-commercially available compounds were prepared and characterized as described in Section 5 of this SI. Other reagents were purchased from Aldrich, Tokyo Chemical Industry Co., Ltd. (TCI), Kanto Chemical Co., Inc., and Wako Pure Chemical Industries, Ltd., and were used as received. A Valore VBP-L24-C2 with 38W LED lamp (VBL-SE150-BBB (430)) was used as the 430 nm light source.

## 2. Preparation of Catalysts and Substrates

Alkenes (**1a-1e**), aldehydes (**2**), Cr catalysts ( $\text{CrCl}_2$ ,  $\text{CrCl}_3 \cdot 3\text{THF}$ ), ligand **L2**, photocatalysts (**10**, **11**) and additives ( $\text{LiCl}$ ,  $\text{LiI}$ ,  $\text{LiBF}_4$ ,  $\text{LiClO}_4$ ,  $\text{NaClO}_4$ ,  $\text{Ca}(\text{ClO}_4)_2 \cdot x\text{H}_2\text{O}$ ,  $\text{Mg}(\text{ClO}_4)_2$ ,  $\text{NaOtBu}$ ) were commercially available and used as purchased. Chiral ligands (**L1**, **L3-L5**) were prepared according to the reported method.<sup>1-4</sup>  $\text{MgPhPO}_3$  was synthesized according to related procedure for the preparation of metal phosphates.<sup>5</sup>

### Preparation of $\text{MgPhPO}_3$

To a solution of  $\text{Mg}(\text{OEt})_2$  (572 mg, 5 mmol) in EtOH (50 ml), phenylphosphonic acid (791 mg, 5 mmol) was added portion wise at 0 °C. The mixture was stirred for 15 min and concentrated under vacuo. The white solid was used for next reaction without further purification.

## 3. General Procedure for Catalytic Asymmetric Allylation of Aldehydes

### Procedure for preparation of **8a-8i**, **8k**

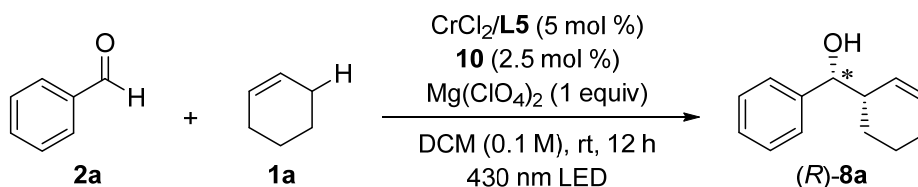

$\text{CrCl}_2$  (1.5 mg, 0.0125 mmol, 5 mol %) and **L5** (4.5 mg, 0.0125 mmol, 5 mol %) were dissolved in degassed

CH<sub>2</sub>Cl<sub>2</sub> (2.5 mL) in a screw-capped vial under argon atmosphere and the mixture was stirred for 1 hour at room temperature. Cyclohexene **1a** (507 µL, 5.0 mmol, 20 eq), Mg(ClO<sub>4</sub>)<sub>2</sub> (55.8 mg, 0.25 mmol, 100 mol %), benzaldehyde **2a** (25.5 µL, 0.25 mmol, 1 eq) and photocatalyst **10** (2.5 mg, 0.00625 mmol, 2.5 mol %) were added to the reaction mixture. The vial was subjected to 430 nm LED irradiation for 12 hours under temperature control (ca. 27–29 °C). Then, the reaction mixture was passed through a pad of silica gel with CH<sub>2</sub>Cl<sub>2</sub> elution. After evaporation, diastereomeric ratio was determined by NMR analysis (68%, >20/1). The residue was purified by silica gel flash column chromatography (CH<sub>2</sub>Cl<sub>2</sub>/hexane = 1/2 to 2/1, v/v) to afford (*R*)-**8a** as colorless oil (25.8 mg, 55%).

The amount of CrCl<sub>2</sub> and **L5** was increased to 10 mol% (CrCl<sub>2</sub>: 3.0 mg, 0.025 mmol, **L5**: 9.0 mg, 0.025 mmol), (*R*)-**8a** was obtained in 65% (30.5 mg).

**(*R*)-((*S*)-cyclohex-2-en-1-yl)(phenyl)methanol (**8a**).**

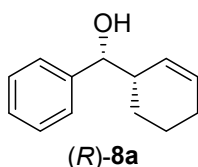

All the spectroscopic data matches with the previously reported data.<sup>6</sup>

<sup>1</sup>H NMR (CDCl<sub>3</sub>, 500 MHz) δ 1.38-1.61 (m, 2H), 1.62-1.83 (m, 2H), 1.84-2.10 (m, 3H), 2.44-2.56 (m, 1H), 4.58 (d, *J* = 6.4 Hz, 1H), 5.38 (dd, *J* = 1.8, 10.1 Hz, 1H), 5.77-5.87 (m, 1H), 7.25-7.39 (m, 5H); <sup>13</sup>C NMR (CDCl<sub>3</sub>, 125 MHz) δ 21.0, 23.8, 25.2, 43.0, 76.7, 126.5, 127.4, 128.0, 128.2, 130.4, 142.8; HPLC (chiral column: CHIRALPAK IA3; solvent: hexane/2-propanol = 200/1; flow rate: 1.0 mL/min; detection: at 210 nm): *t*<sub>R</sub> = 26.7 min (minor) and 28.0 min (major); [α]<sub>D</sub><sup>20</sup> = −4.8 (*c* = 0.76, CHCl<sub>3</sub>, for 95% ee sample).

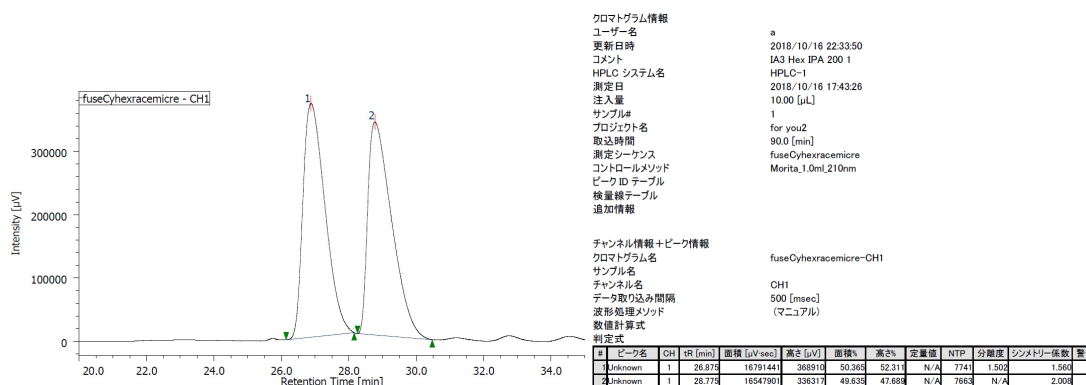

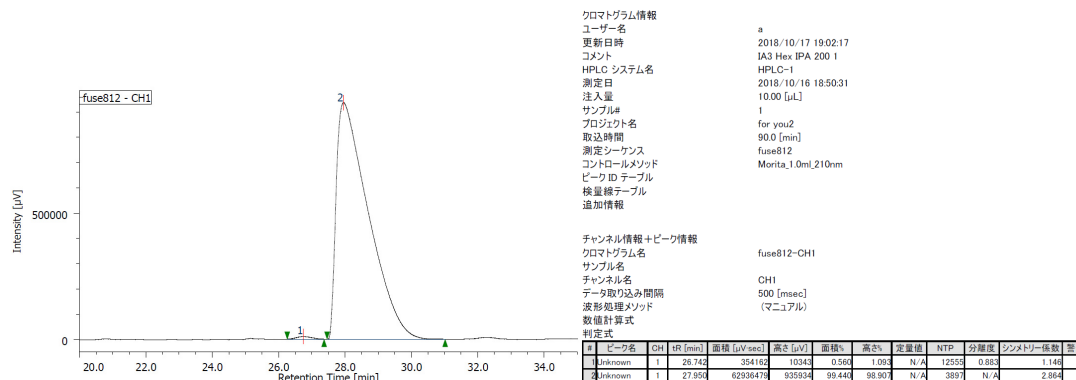

### (R)-(4-chlorophenyl)((S)-cyclohex-2-en-1-yl)methanol (8b).

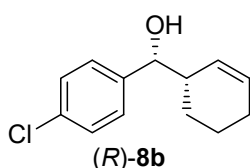

Prepared according to the general procedure, then the crude material was purified by silica gel flash column chromatography ( $\text{CH}_2\text{Cl}_2/\text{hexane} = 1/10$  to  $1/0$ , v/v) to afford (R)-**8b** as colorless oil (45.8 mg, 82%).

IR (neat)  $\nu$  3396, 3022, 2927, 2861, 1698, 1651, 1597, 1541, 1492, 1410, 1090, 1013, 837, 725  $\text{cm}^{-1}$ ;  $^1\text{H}$  NMR ( $\text{CDCl}_3$ , 500 MHz)  $\delta$  1.42-1.54 (m, 2 H), 1.58-1.68 (m, 1H), 1.69-1.78 (m, 1H), 1.86 (d,  $J = 2.3$  Hz, 1H), 1.91-2.02 (m, 2H), 2.40-2.50 (m, 1H), 4.60 (dd,  $J = 2.3, 6.3$  Hz, 1H), 5.39 (dd,  $J = 2.3, 10.3$  Hz, 1H), 5.78-5.87 (m, 1H), 7.24-7.33 (m, 4H);  $^{13}\text{C}$  NMR ( $\text{CDCl}_3$ , 125 MHz)  $\delta$  21.0, 23.6, 25.1, 43.0, 76.6, 127.5, 127.8, 128.3, 130.9, 132.9, 141.2; LRMS (ESI):  $m/z$  245 [ $\text{M}+\text{Na}^+$ ]; HRMS (ESI):  $m/z$  calculated for  $\text{C}_{13}\text{H}_{15}\text{ClNaO}^+$  [ $\text{M}+\text{Na}^+$ ]: 245.0704, found: 245.0701; HPLC (chiral column: CHIRALPAK IA3; solvent: hexane/2-propanol = 200/1; flow rate: 1.0 mL/min; detection: at 210 nm):  $t_R = 37.5$  min (major) and 41.5 min (minor);  $[\alpha]_D^{20} = -24.6$  ( $c = 1.0$ ,  $\text{C}_6\text{H}_6$ , for 99% ee sample).

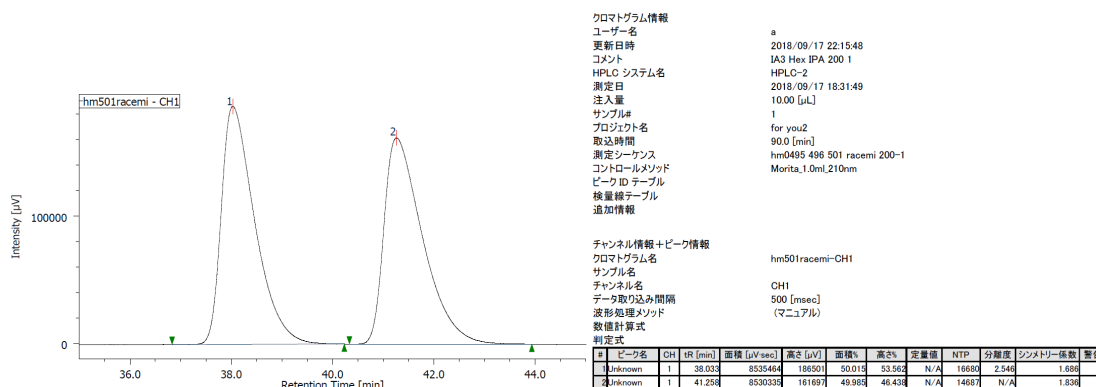

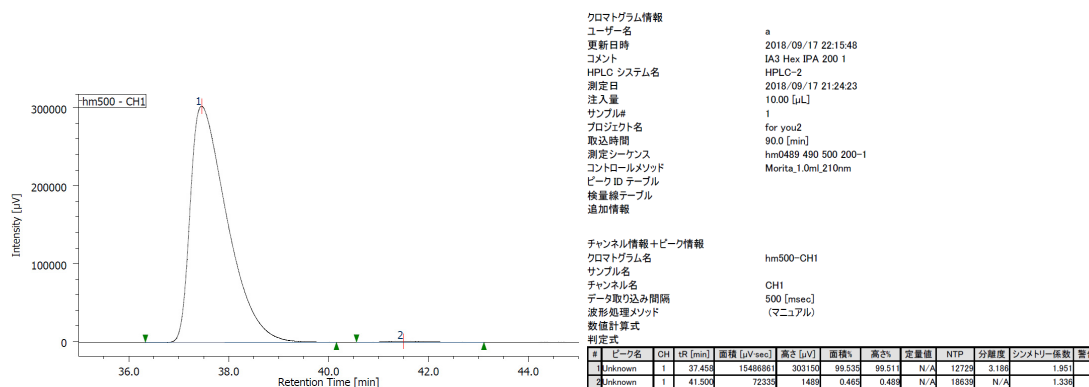

### (R)-(4-bromophenyl)((S)-cyclohex-2-en-1-yl)methanol (8c).

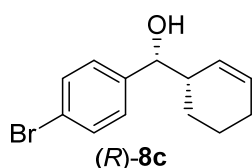

Prepared according to the general procedure, then the crude material was purified by silica gel flash column chromatography ( $\text{CH}_2\text{Cl}_2/\text{hexane} = 1/10$  to  $1/0$ , v/v) to afford (R)-**8c** as colorless oil (54 mg, 81%).

IR (neat)  $\nu$  3396, 3022, 2927, 2860, 1651, 1592, 1488, 1404, 1072, 1010, 812, 725  $\text{cm}^{-1}$ ;  $^1\text{H}$  NMR ( $\text{CDCl}_3$ , 500 MHz)  $\delta$  1.45-1.52 (m, 2 H), 1.57-1.68 (m, 1H), 1.70-1.78 (m, 1H), 1.85 (d,  $J = 2.9$  Hz, 1H), 1.93-2.20 (m, 2H), 2.41-2.50 (m, 1H), 4.59 (dd,  $J = 2.3, 6.3$  Hz, 1H), 5.39 (dd,  $J = 2.3, 10.3$  Hz, 1H), 5.80-5.88 (m, 1H), 7.18-7.30 (m, 2H), 7.43-7.49 (m, 2H);  $^{13}\text{C}$  NMR ( $\text{CDCl}_3$ , 125 MHz)  $\delta$  21.2, 23.8, 25.4, 43.1, 77.5, 121.3, 127.8, 128.4, 131.1, 131.4, 142.0; LRMS (ESI):  $m/z$  289 [ $\text{M}+\text{Na}^+$ ]; HRMS (ESI):  $m/z$  calculated for  $\text{C}_{13}\text{H}_{15}\text{BrNaO}^+$  [ $\text{M}+\text{Na}^+$ ]: 289.0198, found: 289.0197; HPLC (chiral column: CHIRALPAK IA3; solvent: hexane/2-propanol = 200/1; flow rate: 1.0 mL/min; detection: at 210 nm):  $t_R = 42.0$  min (major) and 46.6 min (minor);  $[\alpha]_D^{20} = -5.8$  ( $c = 0.66$ ,  $\text{CHCl}_3$ , for 98% ee sample).

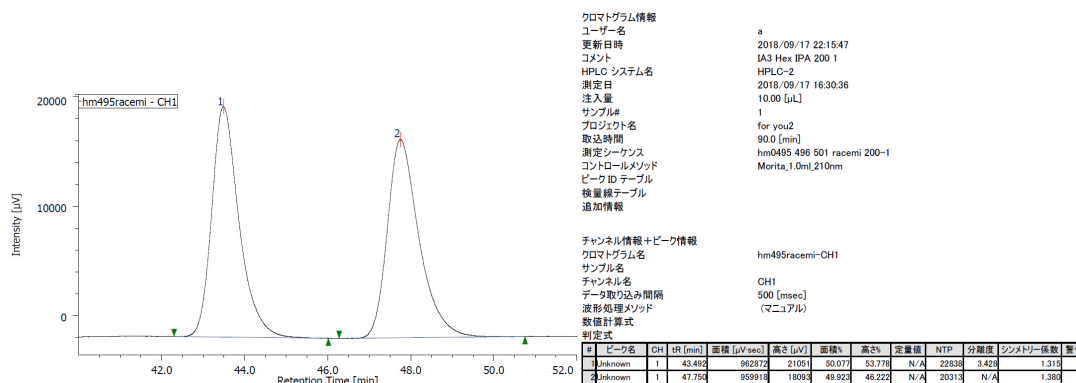

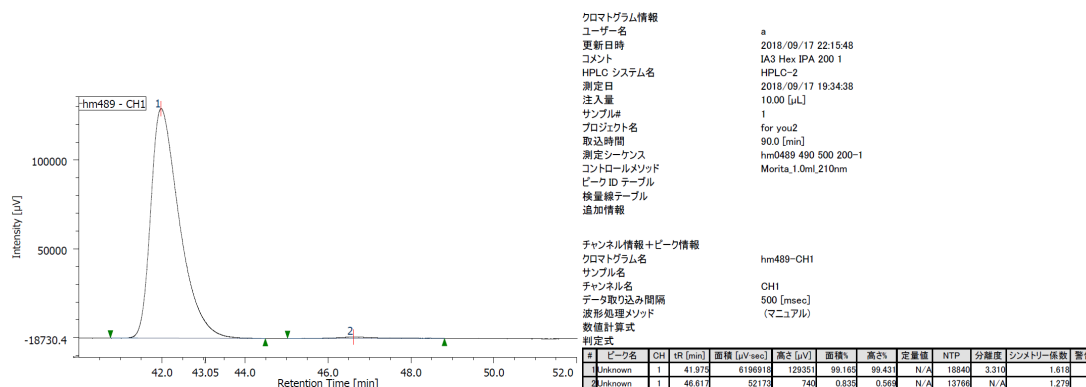

**(R)-((S)-cyclohex-2-en-1-yl)(4-iodophenyl)methanol (8d).**

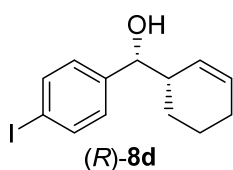

Prepared according to the general procedure, then the crude material was purified by silica gel flash column chromatography ( $\text{CH}_2\text{Cl}_2$ /hexane = 1/10 to 1/0, v/v) to afford (R)-**8d** as colorless oil (36.3 mg, 46%).

IR (neat)  $\nu$  3392, 3021, 2926, 2859, 1698, 1651, 1588, 1481, 1399, 1059, 1004, 811, 725  $\text{cm}^{-1}$ ;  $^1\text{H}$  NMR ( $\text{CDCl}_3$ , 500 MHz)  $\delta$  1.42-1.54 (m, 2 H), 1.59-1.67 (m, 1H), 1.68-1.79 (m, 1H), 1.86 (d,  $J$  = 1.7 Hz, 1H), 1.93-2.20 (m, 2H), 2.39-2.50 (m, 1H), 4.57 (dd,  $J$  = 1.7, 6.3 Hz, 1H), 5.39 (dd,  $J$  = 2.3, 10.3 Hz, 1H), 5.78-5.89 (m, 1H), 7.10 (d,  $J$  = 8.3 Hz, 2H), 7.67 (d,  $J$  = 8.3 Hz, 2H);  $^{13}\text{C}$  NMR ( $\text{CDCl}_3$ , 125 MHz)  $\delta$  21.0, 23.5, 25.1, 42.9, 76.6, 92.7, 127.5, 128.5, 130.9, 137.2, 142.4; LRMS (ESI):  $m/z$  337 [ $\text{M}+\text{Na}^+$ ]; HRMS (ESI):  $m/z$  calculated for  $\text{C}_{13}\text{H}_{15}\text{INO}^+$  [ $\text{M}+\text{Na}^+$ ]: 337.0060, found: 337.0073; HPLC (chiral column: CHIRALPAK IA3; solvent: hexane/2-propanol = 200/1; flow rate: 1.0 mL/min; detection: at 210 nm):  $t_R$  = 47.1 min (major) and 51.3 min (minor);  $[\alpha]_D^{20}$  =  $-6.3$  ( $c$  = 2.7,  $\text{CHCl}_3$ , for 99% ee sample).

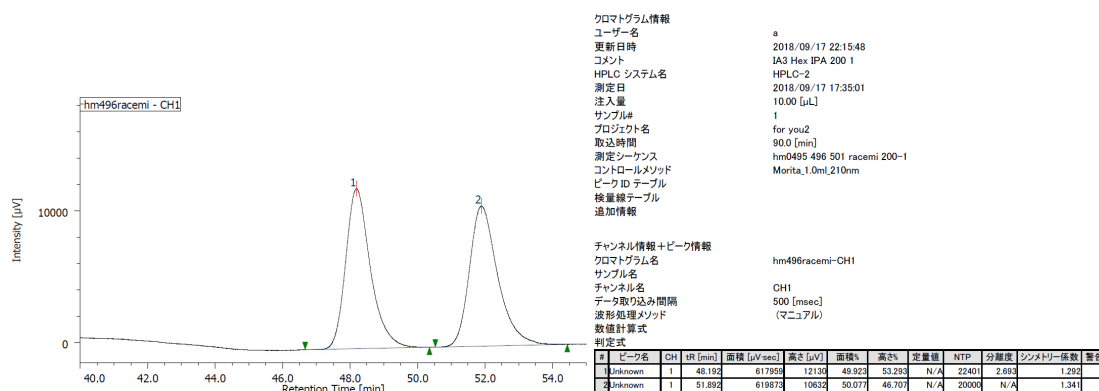

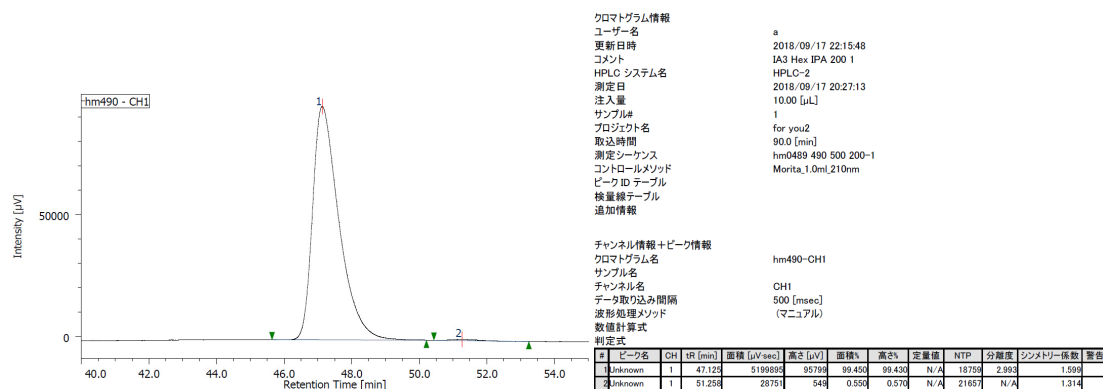

### 1-(3-((*R*)-((*S*)-cyclohex-2-en-1-yl)(hydroxy)methyl)phenyl)ethan-1-one (**8e**).

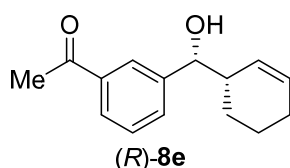

Prepared according to the general procedure, then the crude material was purified by silica gel flash column chromatography (AcOEt/hexane = 1/10 to 1/1, v/v) to afford (*R*)-**8e** as colorless oil (26.7 mg, 46%).

IR (neat)  $\nu$  3444, 3021, 2927, 2860, 1683, 1601, 1584, 1433, 1360, 1276, 1184, 1025, 699  $\text{cm}^{-1}$ ;  $^1\text{H}$  NMR ( $\text{CDCl}_3$ , 500 MHz)  $\delta$  1.45-1.54 (m, 2 H), 1.58-1.67 (m, 1H), 1.71-1.81 (m, 1H), 1.92 (d,  $J = 2.3$  Hz, 1H), 1.96-2.03 (m, 2H), 2.48-2.57 (m, 1H), 2.62 (s, 3H), 4.71 (dd,  $J = 1.7, 5.7$  Hz, 1H), 5.41 (dd,  $J = 1.7, 9.7$  Hz, 1H), 5.83-5.90 (m, 1H), 7.45 (dd,  $J = 7.7, 7.7$  Hz, 1H), 7.57 (d,  $J = 7.7$  Hz, 1H), 7.87 (d,  $J = 7.7$  Hz, 1H), 7.93 (s, 1H);  $^{13}\text{C}$  NMR ( $\text{CDCl}_3$ , 125 MHz)  $\delta$  21.0, 23.4, 25.1, 26.7, 43.0, 76.8, 126.3, 127.4, 127.5, 128.4, 131.0, 131.2, 137.0, 143.4, 198.3; LRMS (DART):  $m/z$  231 [ $\text{M}+\text{H}^+$ ]; HRMS (DART):  $m/z$  calculated for  $\text{C}_{15}\text{H}_{19}\text{O}_2^+$  [ $\text{M}+\text{H}^+$ ]: 231.1380, found: 231.1371; HPLC (chiral column: CHIRALPAK IBN3; solvent: hexane/2-propanol = 50/1; flow rate: 1.0 mL/min; detection: at 210 nm):  $t_R = 42.4$  min (minor) and 54.4 min (major);  $[\alpha]_D^{20} = +6.9$  ( $c = 0.54$ ,  $\text{CHCl}_3$ , for 99% ee sample).

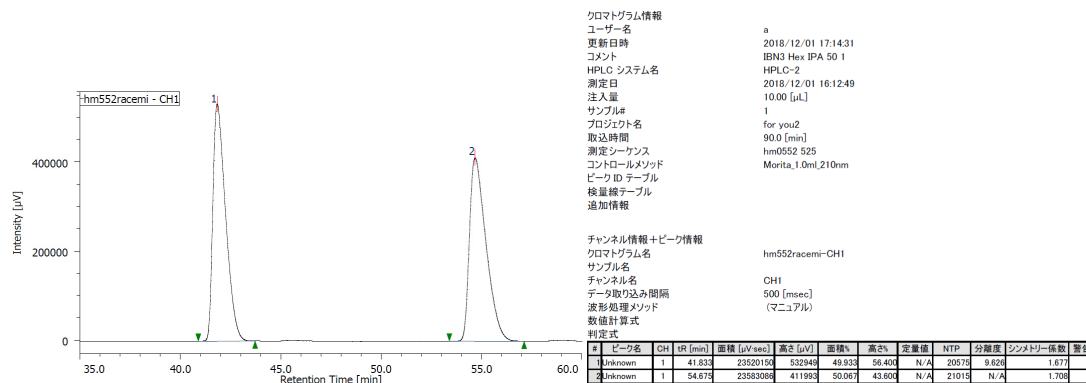

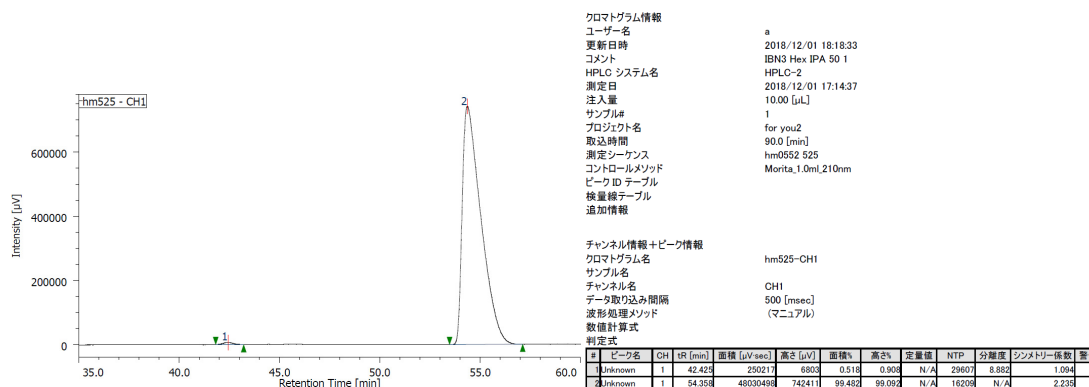

## Methyl 4-((*R*)-((*S*)-cyclohex-2-en-1-yl)(hydroxy)methyl)benzoate (**8f**).

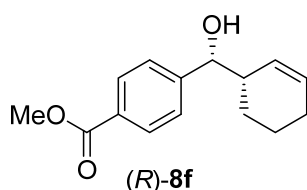

Prepared according to the general procedure, then the crude material was purified by silica gel flash column chromatography (AcOEt/hexane = 1/10 to 1/1, v/v) to afford (*R*)-**8f** as colorless oil (49.4 mg, 80%). All the spectroscopic data matches with the previously reported data.<sup>7</sup>

<sup>1</sup>H NMR (CDCl<sub>3</sub>, 500 MHz) δ 1.44-1.62 (m, 1H), 1.66-1.80 (m, 1H), 1.90-2.02 (m, 3H), 2.41-2.46 (m, 1H), 3.91 (s, 3H), 4.70 (dd, *J* = 2.3, 6.3 Hz, 1H), 5.42 (dd, *J* = 1.7, 10.3 Hz, 1H), 5.84-5.90 (m, 1H), 7.42 (d, *J* = 8.3 Hz, 2H), 8.02 (d, *J* = 8.3 Hz, 2H); <sup>13</sup>C NMR (CDCl<sub>3</sub>, 125 MHz) δ 21.0, 23.3, 25.1, 42.9, 52.0, 76.6, 126.4, 127.5, 129.0, 129.4, 131.0, 148.1, 167.0; HPLC (chiral column: CHIRALPAK IA3; solvent: hexane/2-propanol = 50/1; flow rate: 1.0 mL/min; detection: at 210 nm): *t*<sub>R</sub> = 38.8 min (major) and 55.2 min (minor); [α]<sub>D</sub><sup>20.9</sup> = +5.1 (*c* = 0.97, CHCl<sub>3</sub>, for 99% ee sample).

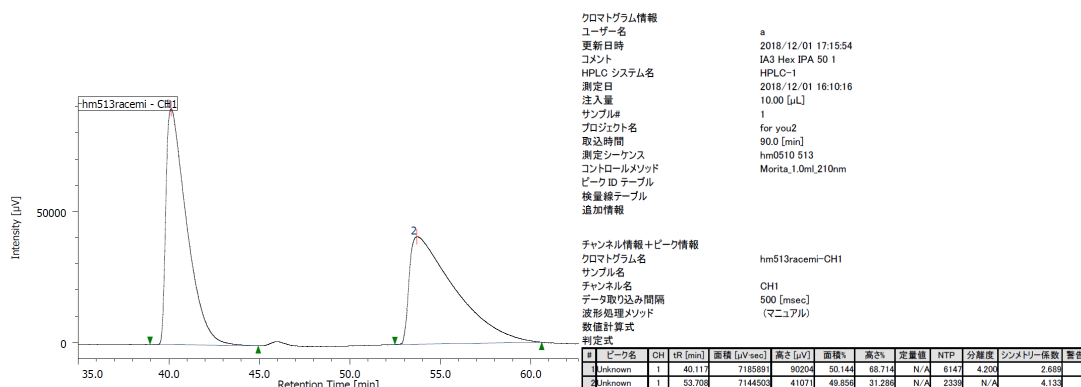

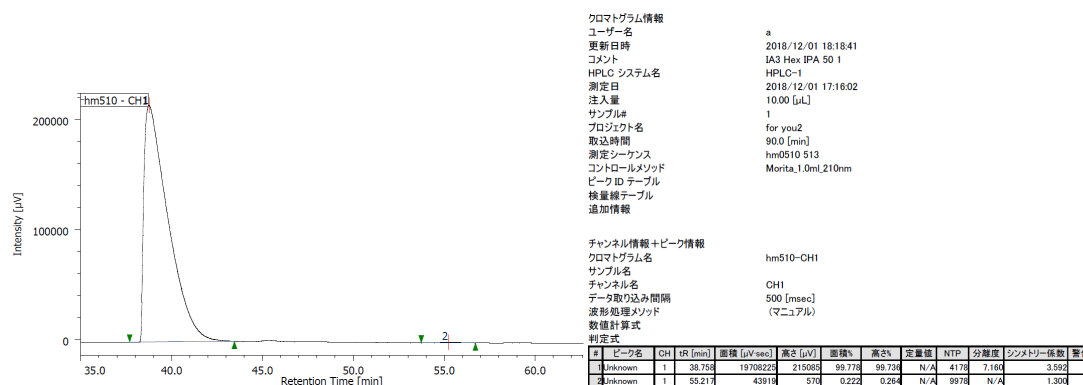

**(R)-((S)-cyclohex-2-en-1-yl)(4-(trifluoromethyl)phenyl)methanol (8g).**

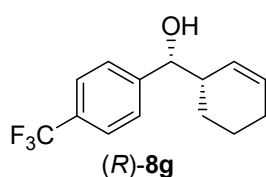

Prepared according to the general procedure, then the crude material was purified by silica gel flash column chromatography ( $\text{CH}_2\text{Cl}_2$ /hexane = 1/10 to 1/0, v/v) to afford (R)-8g as colorless oil (40.2 mg, 63%). All the spectroscopic data matches with the previously reported data.<sup>8</sup>

$^1\text{H}$  NMR ( $\text{CDCl}_3$ , 500 MHz)  $\delta$  1.45-1.62 (m, 2H), 1.70-1.81 (m, 1H), 1.91 (d,  $J = 2.3$  Hz, 1H), 1.97-2.03 (m, 2H), 2.47-2.56 (m, 1H), 4.71 (d,  $J = 8.0$  Hz, 2H), 5.42 (dd,  $J = 2.3, 10.3$  Hz, 1H), 5.85-5.92 (m, 1H), 7.47 (d,  $J = 8.0$  Hz, 2H), 7.60 (d,  $J = 8.3$  Hz, 2H);  $^{13}\text{C}$  NMR ( $\text{CDCl}_3$ , 125 MHz)  $\delta$  21.0, 23.2, 25.1, 43.0, 76.5, 124.2 (q,  $J = 270.7$  Hz), 125.1 (q,  $J = 4.8$  Hz), 126.7, 127.3, 129.5 (q,  $J = 32.2$  Hz), 131.3, 146.7; HPLC (chiral column: CHIRALPAK IBN3; solvent: hexane/2-propanol = 200/1; flow rate: 1.0 mL/min; detection: at 210 nm):  $t_R = 23.4$  min (major) and 24.6 min (minor);  $[\alpha]_D^{20} = +8.6$  ( $c = 1.1$ ,  $\text{CHCl}_3$ , for 99% ee sample).

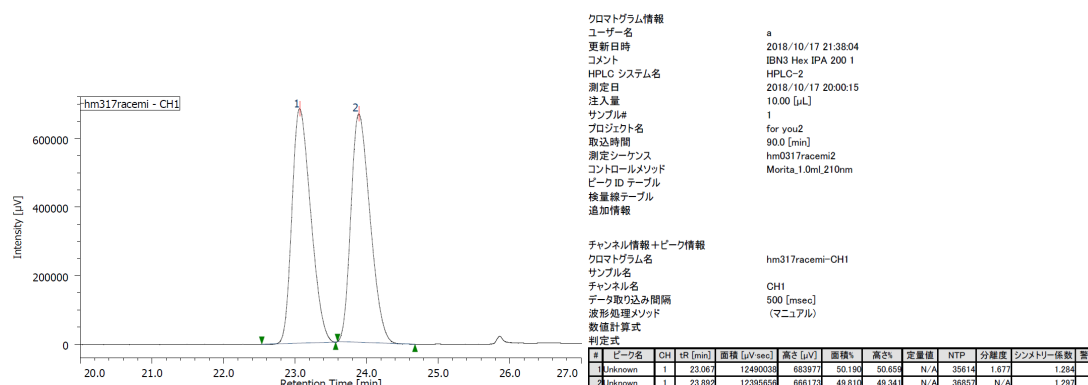

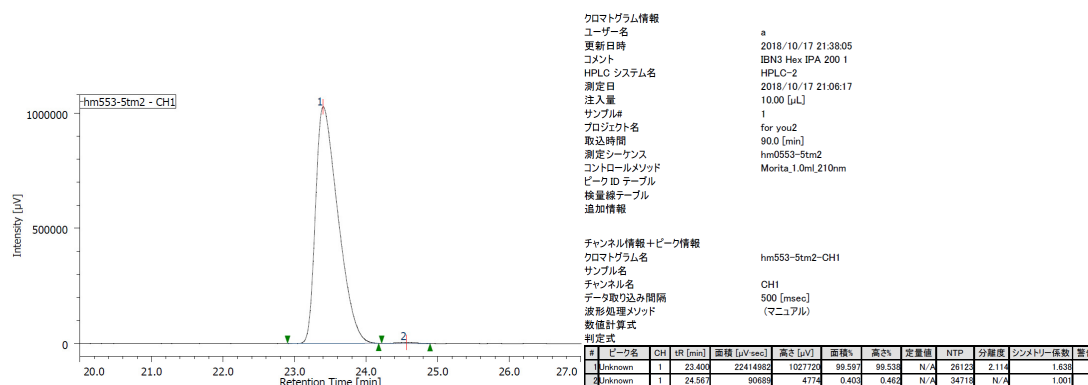

### (R)-((S)-cyclopent-2-en-1-yl)(phenyl)methanol (8h).

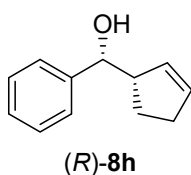

Prepared according to the general procedure, then the crude material was purified by silica gel flash column chromatography ( $\text{CH}_2\text{Cl}_2/\text{hexane} = 1/2$  to  $2/1$ , v/v) to afford **(R)-8h** as colorless oil (25.5 mg, 59%). All the spectroscopic data matches with the previously reported data.<sup>6</sup>

$^1\text{H}$  NMR ( $\text{CDCl}_3$ , 500 MHz)  $\delta$  1.78-2.00 (m, 3H), 2.24-2.45 (m, 2H), 3.05-3.17 (m, 1H), 4.58 (d,  $J = 6.4$  Hz, 1H), 5.38-5.44 (m, 1H), 5.83-5.92 (m, 1H), 7.22-7.42 (m, 5H);  $^{13}\text{C}$  NMR ( $\text{CDCl}_3$ , 125 MHz)  $\delta$  25.0, 32.2, 53.9, 76.7, 126.2, 127.3, 128.2, 131.2, 133.7, 143.4; HPLC (chiral column: CHIRALPAK IA3; solvent: hexane/2-propanol = 200/1; flow rate: 1.0 mL/min; detection: at 210 nm):  $t_R = 25.2$  min (minor) and 26.1 min (major);  $[\alpha]_D^{20} = -67$  ( $c = 1.56$ ,  $\text{CHCl}_3$ , for 99% ee sample).

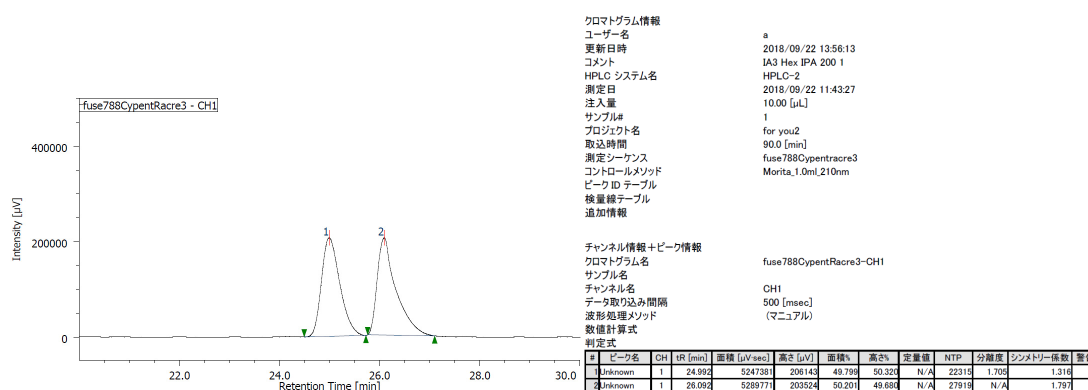

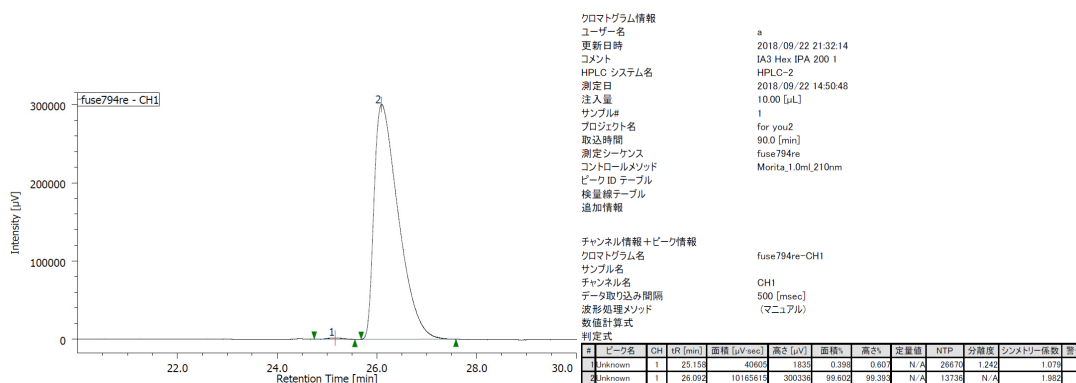

## (R)-(4-chlorophenyl)((S)-cyclopent-2-en-1-yl)methanol (8i).

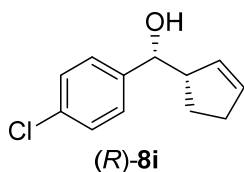

Prepared according to the general procedure, then the crude material was purified by silica gel flash column chromatography ( $\text{CH}_2\text{Cl}_2/\text{hexane} = 1/2$  to  $2/1$ , v/v) to afford (R)-8i as colorless solid (28.5 mg, 55%).

IR (neat)  $\nu$  3390, 3053, 2929, 2850, 1902, 1716, 1597, 1489, 1410, 1293, 1089, 1013, 827, 726  $\text{cm}^{-1}$ ;  $^1\text{H}$  NMR ( $\text{CDCl}_3$ , 500 MHz)  $\delta$  1.72-1.97 (m, 3H), 2.23-2.43 (m, 2H), 3.01-3.12 (m, 1H), 4.58 (d,  $J = 6.4$  Hz, 1H), 5.37-5.45 (m, 1H), 5.84-5.93 (m, 1H), 7.24-7.34 (m, 4H);  $^{13}\text{C}$  NMR ( $\text{CDCl}_3$ , 125 MHz)  $\delta$  24.6, 32.2, 53.9, 76.0, 127.6, 128.3, 130.8, 132.9, 134.2, 141.8; LRMS (ESI):  $m/z$  231 [ $\text{M}+\text{Na}^+$ ]; HRMS (ESI):  $m/z$  calculated for  $\text{C}_{12}\text{H}_{13}\text{ClNaO}^+$  [ $\text{M}+\text{Na}^+$ ]: 231.0547, found: 231.0550; HPLC (chiral column: CHIRALPAK IC3; solvent: hexane/2-propanol = 200/1; flow rate: 1.0 mL/min; detection: at 210 nm):  $t_R = 16.4$  min (major) and 20.8 min (minor);  $[\alpha]_D^{20} = -60$  ( $c = 0.98$ ,  $\text{CHCl}_3$ , for 99% ee sample).

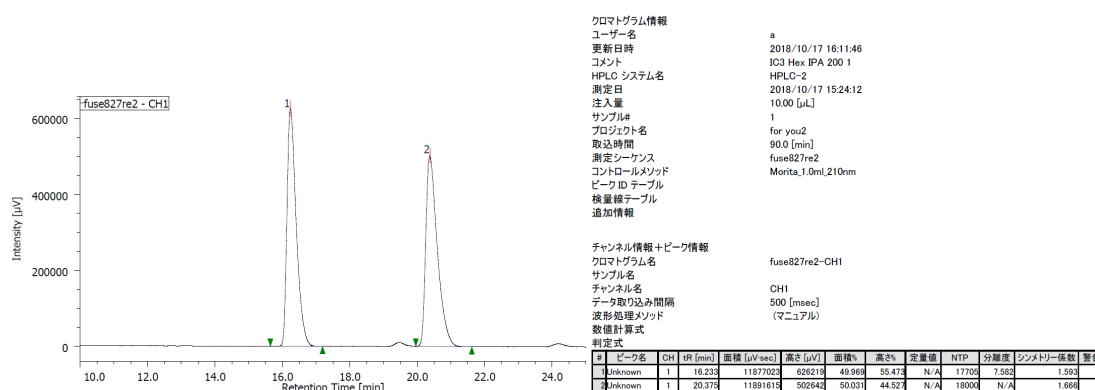

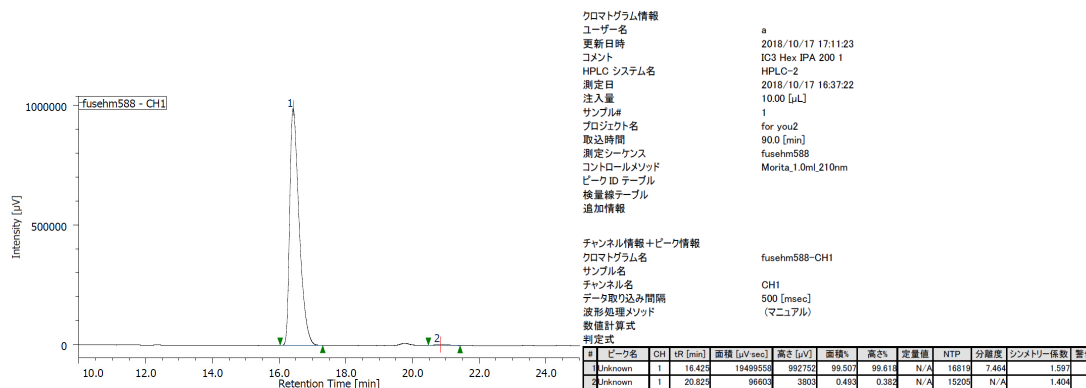

**(R)-(4-chlorophenyl)((S)-cyclohept-2-en-1-yl)methanol (8k).**

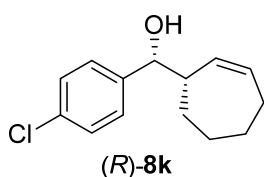

Prepared according to the general procedure, then the crude material was purified by silica gel flash column chromatography ( $\text{CH}_2\text{Cl}_2$ /hexane = 1/2 to 2/1, v/v) to afford (R)-8k as colorless solid (28.1 mg, 47%).

IR (neat)  $\nu$  3389, 3020, 2923, 2852, 1901, 1721, 1650, 1597, 1490, 1444, 1090, 1013, 832, 687  $\text{cm}^{-1}$ ;  $^1\text{H}$  NMR ( $\text{CDCl}_3$ , 500 MHz)  $\delta$  1.23-1.41 (m, 2H), 1.47-1.72 (m, 2H), 1.77-2.21 (m, 5H), 2.56-2.65 (m, 1H), 4.65 (d,  $J$  = 6.3 Hz, 1H), 5.46-5.54 (m, 1H), 5.75-5.84 (m, 1H), 7.21-7.37 (m, 4H);  $^{13}\text{C}$  NMR ( $\text{CDCl}_3$ , 125 MHz)  $\delta$  26.7, 27.9, 28.5, 29.8, 47.0, 76.7, 128.0, 128.4, 132.8, 133.1, 133.1, 141.6; LRMS (ESI):  $m/z$  259 $[\text{M}+\text{Na}^+]$ ; HRMS (ESI):  $m/z$  calculated for  $\text{C}_{14}\text{H}_{17}\text{ClNaO}^+$   $[\text{M}+\text{Na}^+]$ : 259.0860, found: 259.0854; HPLC (chiral column: CHIRALPAK IA3; solvent: hexane/2-propanol = 200/1; flow rate: 1.0 mL/min; detection: at 210 nm):  $t_R$  = 43.8 min (major) and 50.6 min (minor);  $[\alpha]_D^{20.9}$  = +63 ( $c$  = 0.92,  $\text{CHCl}_3$ , for 99% ee sample).

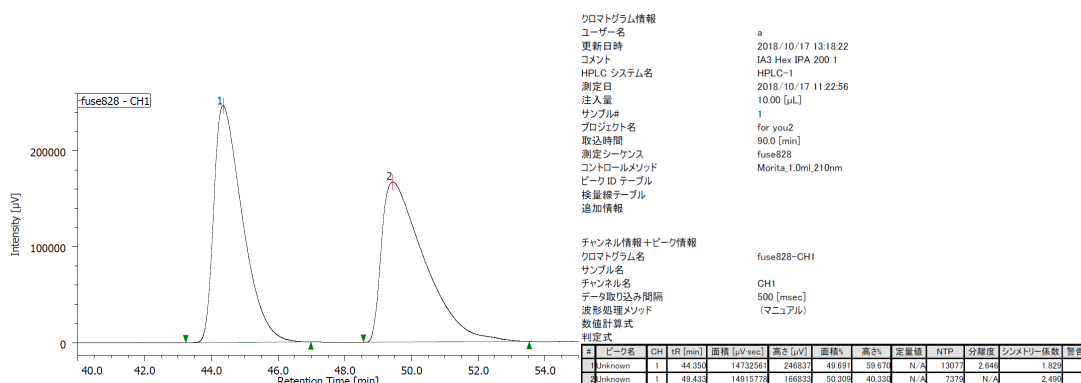

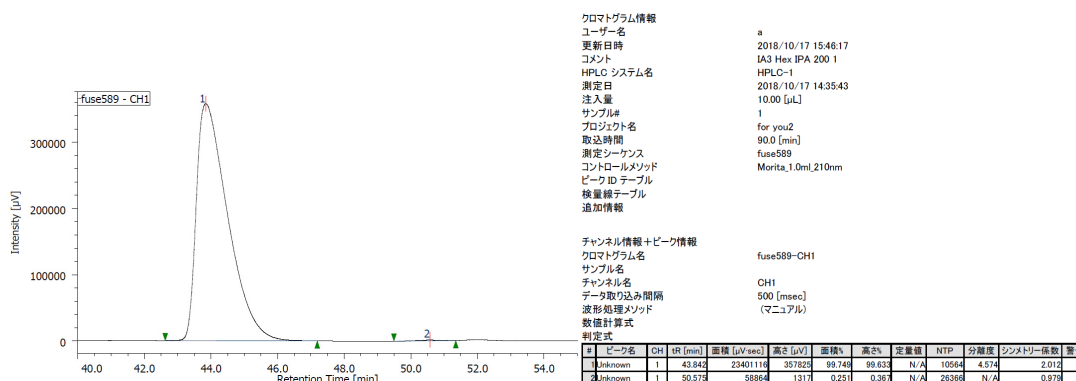

## Procedure for preparation of 8j

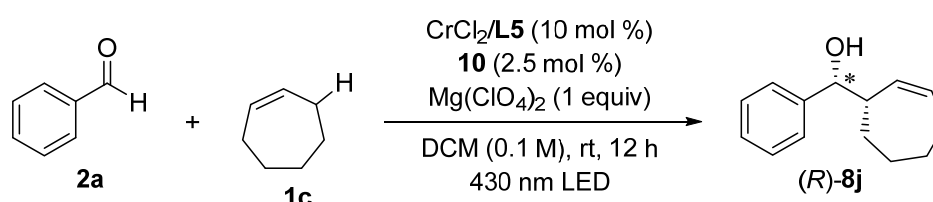

$\text{CrCl}_2$  (3.0 mg, 0.025 mmol, 10 mol %) and **L5** (9.0 mg, 0.025 mmol, 10 mol %) were dissolved in degassed  $\text{CH}_2\text{Cl}_2$  (2.5 mL) in a screw-capped vial under argon atmosphere and the mixture was stirred for 1 hour at room temperature. Cyclohexene **1c** (584  $\mu\text{L}$ , 5.0 mmol, 20 eq),  $\text{Mg}(\text{ClO}_4)_2$  (55.8 mg, 0.25 mmol, 100 mol %), benzaldehyde **2a** (25.5  $\mu\text{L}$ , 0.25 mmol, 1 eq) and photocatalyst **10** (2.5 mg, 0.00625 mmol, 2.5 mol %) were added to the reaction mixture. The vial was subjected to 430 nm LED irradiation for 12 hours under temperature control (ca. 27–29 °C). Then, the reaction mixture was passed through a pad of silica gel with  $\text{CH}_2\text{Cl}_2$  elution. After evaporation, diastereomeric ratio was determined by NMR analysis (68%, >20/1). The residue was purified by silica gel flash column chromatography ( $\text{CH}_2\text{Cl}_2/\text{hexane}$  = 1/2 to 2/1, v/v) to afford (R)-**8a** as colorless oil (28.4 mg, 56%).

(R)-((S)-cyclohept-2-en-1-yl)(phenyl)methanol (**8j**).

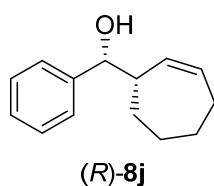

All the spectroscopic data matches with the previously reported data.<sup>9</sup>

$^1\text{H}$  NMR ( $\text{CDCl}_3$ , 500 MHz)  $\delta$  1.21–1.40 (m, 2H), 1.48–1.75 (m, 2H), 1.85–2.24 (m, 5H), 2.62–2.71 (m, 1H), 4.66 (d,  $J$  = 7.3 Hz, 1H), 5.53 (dd,  $J$  = 3.2, 14.5 Hz, 1H), 5.73–5.83 (m, 1H), 7.25–7.39 (m, 5H);  $^{13}\text{C}$  NMR ( $\text{CDCl}_3$ , 125 MHz)  $\delta$  26.7, 28.1, 28.6, 30.0, 46.9, 77.4, 126.7, 127.5, 128.3, 132.4, 133.5, 143.2; HPLC (chiral column: CHIRALPAK IA3; solvent: hexane/2-propanol = 200/1; flow rate: 1.0 mL/min; detection: at 210 nm):  $t_R$  = 32.8 min (minor) and 38.4 min (major);  $[\alpha]_D^{20}$  = +84 ( $c$  = 0.77,  $\text{CHCl}_3$ , for 99% ee sample).

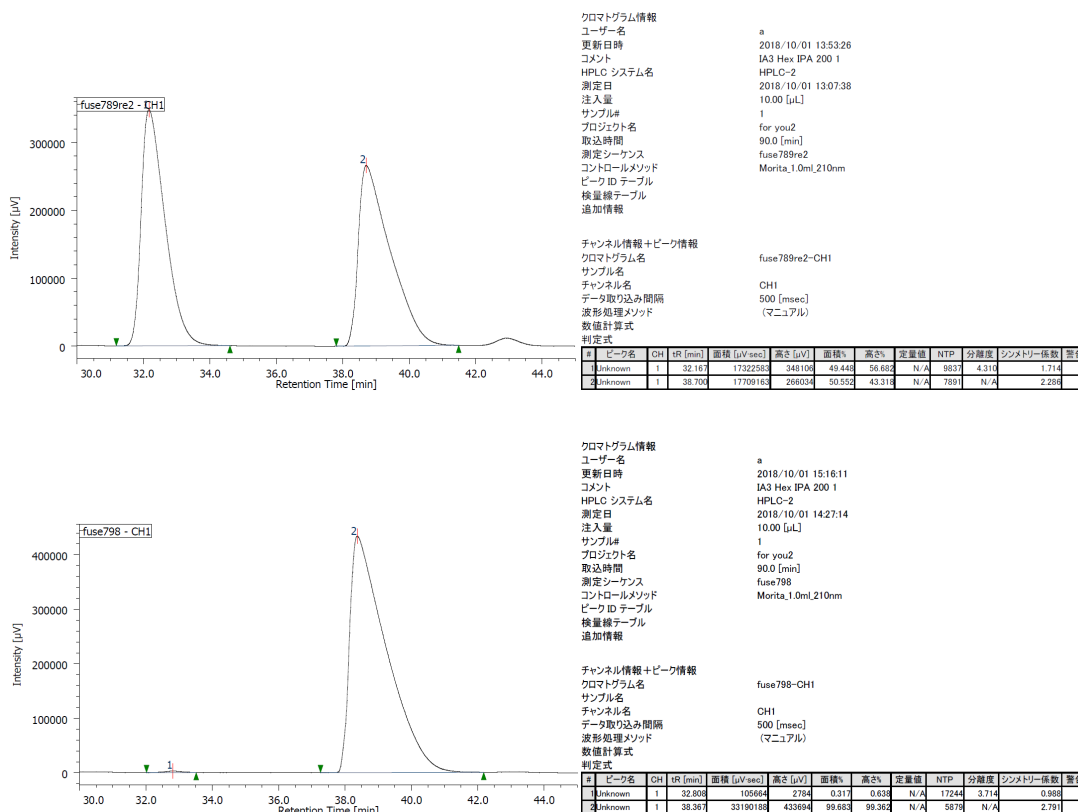

## Procedure for preparation of **8l** and **8v**

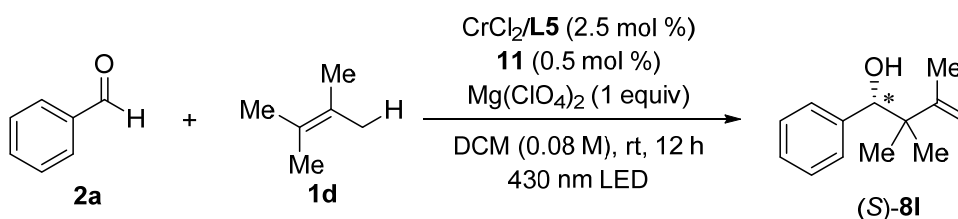

CrCl<sub>2</sub> (1.5 mg, 0.0125 mmol, 2.5 mol %) and **L5** (4.5 mg, 0.0125 mmol, 2.5 mol %) were dissolved in degassed CH<sub>2</sub>Cl<sub>2</sub> (4 mL) in a screw-capped vial under argon atmosphere and the mixture was stirred for 1 hour at room temperature. 2,3-Dimethyl-2-butene **1d** (106 μL, 1.0 mmol, 2 eq), Mg(ClO<sub>4</sub>)<sub>2</sub> (112 mg, 0.5 mmol, 100 mol %), benzaldehyde **2a** (51 μL, 0.5 mmol, 1 eq) and photocatalyst **11** (1.0 mg, 0.0025 mmol, 0.5 mol %) were added to the reaction mixture. The vial was subjected to 430 nm LED irradiation for 12 hours under temperature control (ca. 27–29 °C). Then, the reaction mixture was directly loaded to silica gel and purified by flash column chromatography (CH<sub>2</sub>Cl<sub>2</sub>/hexane = 1/10 to 1/0, v/v) to afford (*R*)-**8l** as colorless oil (82.1 mg, 87%).

**(S)-2,2,3-trimethyl-1-phenylbut-3-en-1-ol (8l).**

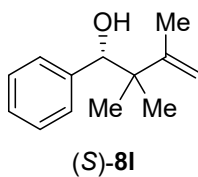

All the spectroscopic data matches with the previously reported data.<sup>10</sup>

<sup>1</sup>H NMR (CDCl<sub>3</sub>, 500 MHz) δ 0.94 (s, 3H), 0.99 (s, 3H), 1.87 (s, 3H), 2.08 (d, *J* = 1.7 Hz, 1H), 4.63 (s, 1H), 4.97 (s, 1H), 5.04 (s, 1H), 7.18-7.36 (m, 5H); <sup>13</sup>C NMR (CDCl<sub>3</sub>, 125 MHz) δ 19.8, 20.1, 24.2, 44.5, 77.4, 113.2, 127.2, 127.4, 127.9, 140.2, 150.6; HPLC (chiral column: CHIRALPAK IA3; solvent: hexane/2-propanol = 100/1; flow rate: 1.0 mL/min; detection: at 210 nm): *t*<sub>R</sub> = 11.1 min (minor) and 13.5 min (major); [α]<sub>D</sub><sup>20</sup> = +99 (*c* = 0.24, CHCl<sub>3</sub>, for 88% ee sample).

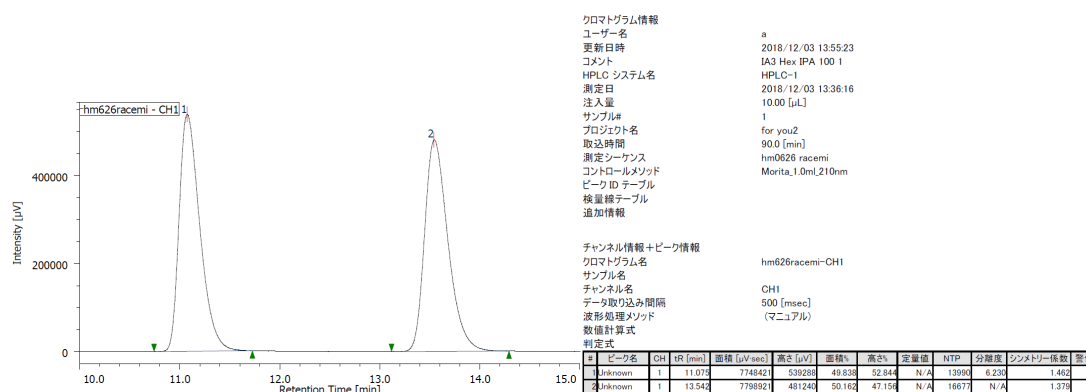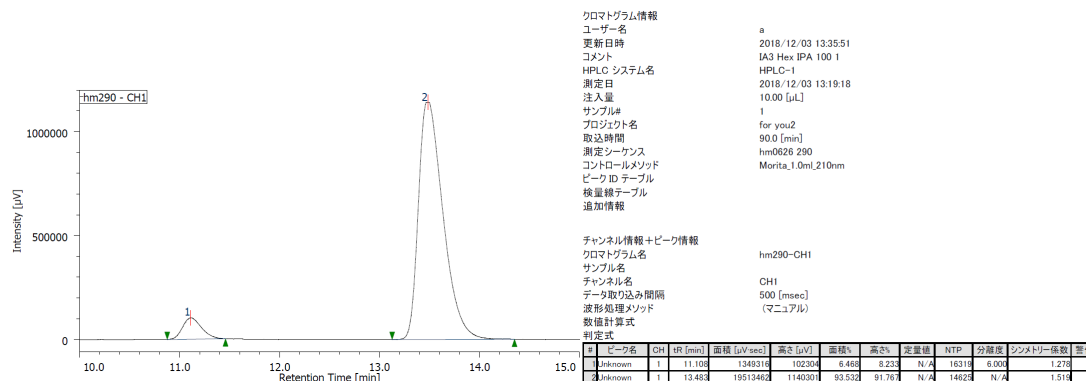

### (R)-2,2-dimethyl-1-phenylbut-3-en-1-ol (8v).

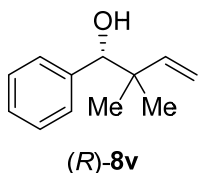

Prepared according to the general procedure, then the reaction mixture was passed through a pad of silica gel with CH<sub>2</sub>Cl<sub>2</sub>. After evaporation, regioisomeric ratio was determined by NMR analysis (1.9/1 rr). The residue was purified by silica gel flash column chromatography (CH<sub>2</sub>Cl<sub>2</sub>/hexane = 1/10 to 1/0, v/v) to afford (R)-8v

as colorless oil along with the inseparable mixture of stereoisomers (**8w**) (42.8 mg, 97%). All the spectroscopic data matches with the previously reported data.<sup>11</sup> The following spectroscopic data were collected with a pure sample obtained by preparative TLC.

<sup>1</sup>H NMR (CDCl<sub>3</sub>, 500 MHz) δ 0.88 (s, 3H), 0.93 (s, 3H), 2.01 (s, 1H), 4.33 (s, 1H), 4.99 (dd, *J* = 1.4, 17.9 Hz, 1H), 5.05 (dd, *J* = 1.4, 11.0 Hz, 1H), 5.83 (dd, *J* = 11.0, 17.9 Hz, 1H), 7.12-7.26 (m, 5H); <sup>13</sup>C NMR (CDCl<sub>3</sub>, 125 MHz) δ 20.1, 24.4, 42.2, 80.6, 113.8, 127.4, 127.4, 127.7, 140.7, 145.0; HPLC (chiral column: CHIRALPAK IE3; solvent: hexane/2-propanol = 500/1; flow rate: 1.0 mL/min; detection: at 210 nm): *t*<sub>R</sub> = 27.3 min (minor) and 34.2 min (major); [α]<sub>D</sub><sup>20</sup> = +111.5 (*c* = 1.23, CHCl<sub>3</sub>, for 83% ee sample).

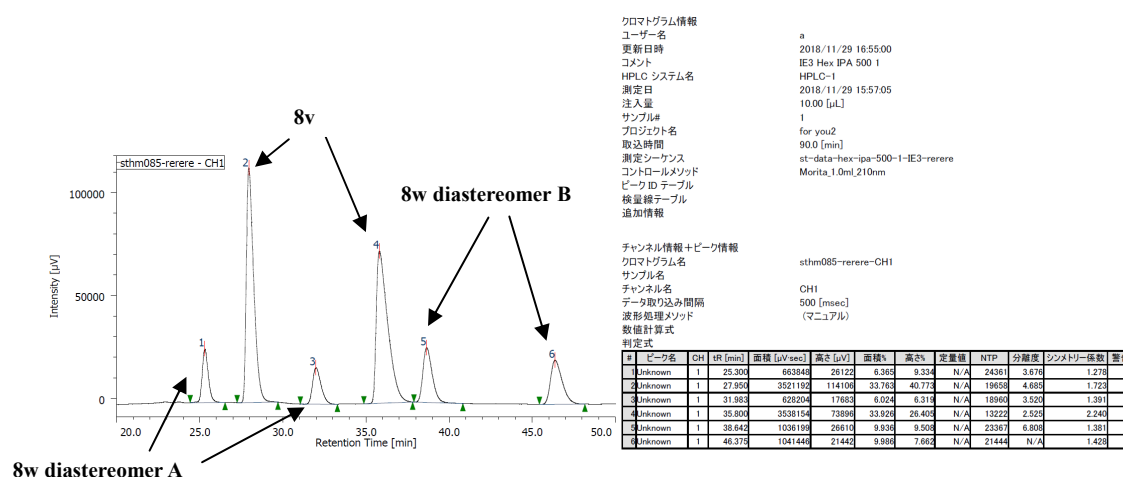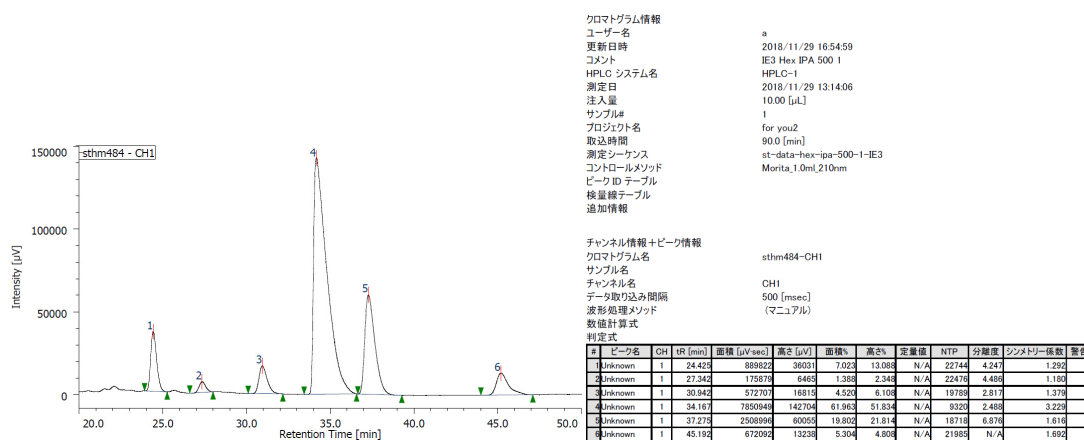

## Procedure for preparation of **8m** and **8p**

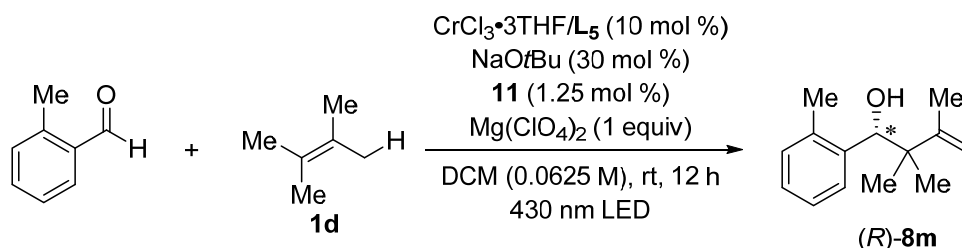

CrCl<sub>3</sub>·3THF (9.4 mg, 0.025 mmol, 10 mol %), NaOtBu (7.2 mg, 0.075 mmol, 30 mol %) and **L5** (9.0 mg, 0.025 mmol, 10 mol %) were dissolved in degassed CH<sub>2</sub>Cl<sub>2</sub> (4 mL) in a screw-capped vial under argon

atmosphere and the mixture was stirred for 1 hour at room temperature. 2,3-Dimethyl-2-butene **1d** (540  $\mu\text{L}$ , 5.0 mmol, 20 eq),  $\text{Mg}(\text{ClO}_4)_2$  (55.8 mg, 0.25 mmol, 100 mol %), *o*-tolaldehyde (29  $\mu\text{L}$ , 0.25 mmol, 1 eq) and photocatalyst **11** (1.3 mg, 0.03125 mmol, 1.25 mol %) were added to the reaction mixture. The vial was subjected to 430 nm LED irradiation for 12 hours under temperature control (ca. 27–29 °C). Then, the reaction mixture was directly loaded to silica gel and purified by flash column chromatography ( $\text{CH}_2\text{Cl}_2/\text{hexane} = 1/10$  to 1/0, v/v) to afford (*R*)-**8m** as colorless oil (51.1 mg, 50%).

**(*R*)-2,2,3-trimethyl-1-(*o*-tolyl)but-3-en-1-ol (8m).**

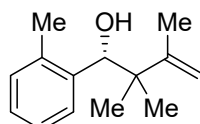

**(*R*)-8m**

IR (neat)  $\nu$  3466, 3090, 2972, 1633, 1607, 1463, 1377, 1150, 1049, 892, 790, 734  $\text{cm}^{-1}$ ;  $^1\text{H}$  NMR ( $\text{CDCl}_3$ , 500 MHz)  $\delta$  0.93 (s, 3H), 1.10 (s, 3H), 1.90 (s, 3H), 2.00 (d,  $J = 1.7$  Hz, 1H), 2.38 (s, 3H), 4.90–5.10 (m, 2H), 5.05 (s, 1H), 7.10–7.25 (m, 3H), 7.50 (dd,  $J = 1.7, 7.4$  Hz, 1H);  $^{13}\text{C}$  NMR ( $\text{CDCl}_3$ , 125 MHz)  $\delta$  20.1, 20.4, 20.5, 23.8, 45.8, 72.2, 113.3, 125.3, 127.1, 128.3, 130.1, 136.1, 138.6, 150.9; LRMS (ESI):  $m/z$  227 [ $\text{M}+\text{Na}^+$ ]; HRMS (ESI):  $m/z$  calculated for  $\text{C}_{14}\text{H}_{20}\text{NaO}^+$  [ $\text{M}+\text{Na}^+$ ]: 227.1406, found: 227.1395; HPLC (chiral column: CHIRALPAK IA3; solvent: hexane/2-propanol = 100/1; flow rate: 1.0 mL/min; detection: at 210 nm):  $t_R = 9.7$  min (major) and 10.7 min (minor);  $[\alpha]_D^{20} = +110$  ( $c = 1.05$ ,  $\text{CHCl}_3$ , for 96% ee sample).

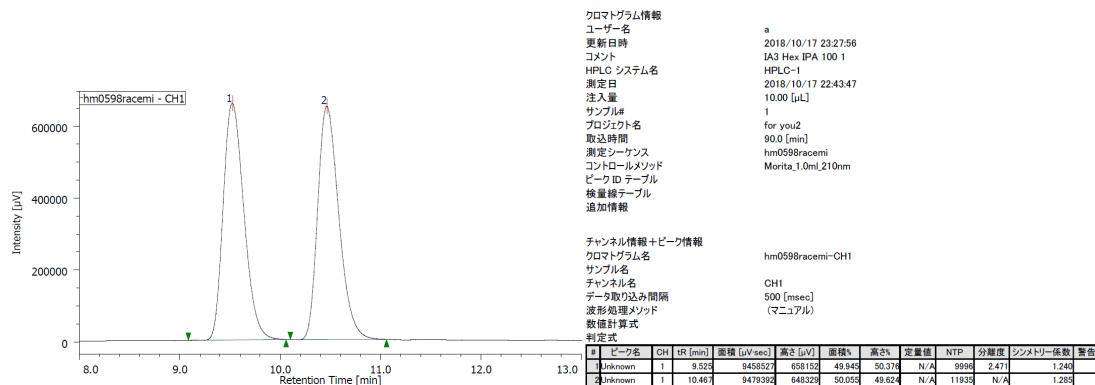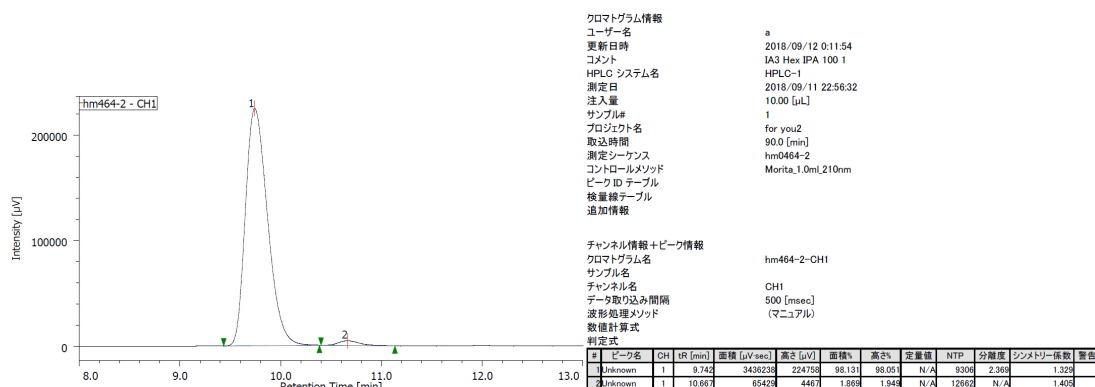

**(*S*)-1-(4-methoxyphenyl)-2,2,3-trimethylbut-3-en-1-ol (8p).**

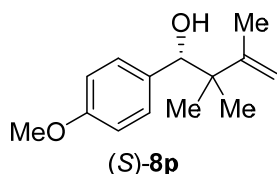

Prepared according to the general procedure, then the crude material was purified by silica gel flash column chromatography (AcOEt/hexane = 1/10 to 1/1, v/v) to afford (*S*)-**8p** as colorless oil (21.5 mg, 39%). All the spectroscopic data matches with the previously reported data.<sup>10</sup>

<sup>1</sup>H NMR (CDCl<sub>3</sub>, 500 MHz) δ 0.92 (s, 3H), 0.98 (s, 3H), 1.86 (s, 3H), 2.03 (d, *J* = 1.7 Hz, 1H), 3.81 (s, 3H), 4.59 (s, 1H), 4.96 (s, 1H), 5.02 (s, 1H), 6.83-6.88 (m, 2H), 7.23-7.27 (m, 2H); <sup>13</sup>C NMR (CDCl<sub>3</sub>, 125 MHz) δ 19.8, 20.0, 24.2, 44.6, 55.2, 77.1, 112.8, 113.1, 129.0, 132.3, 150.7, 158.8; HPLC (chiral column: CHIRALPAK IA3; solvent: hexane/2-propanol = 200/1; flow rate: 1.0 mL/min; detection: at 210 nm): *t*<sub>R</sub> = 27.2 min (minor) and 28.8 min (major); [α]<sub>D</sub><sup>20</sup> = +138 (*c* = 0.49, CHCl<sub>3</sub>, for 96% ee sample).

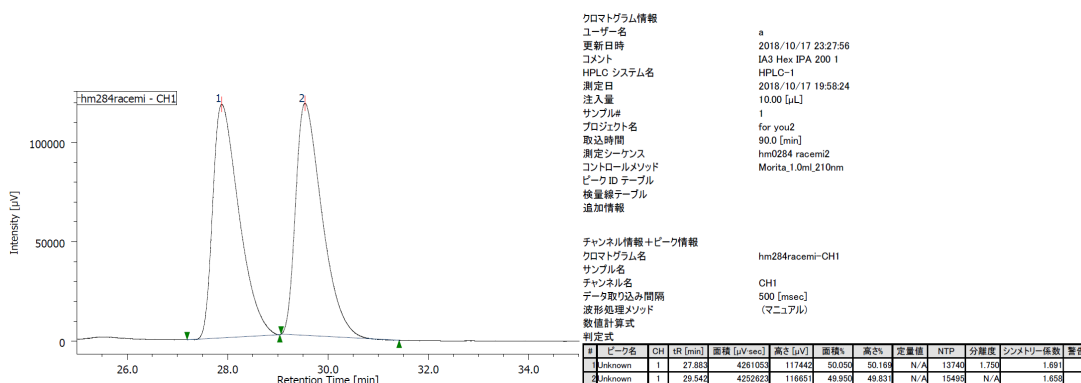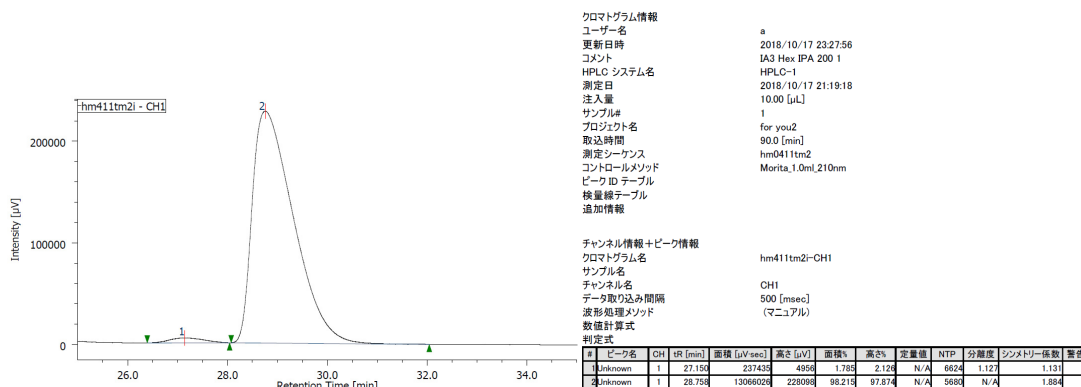

**Procedure for preparation of 8n and 8o**

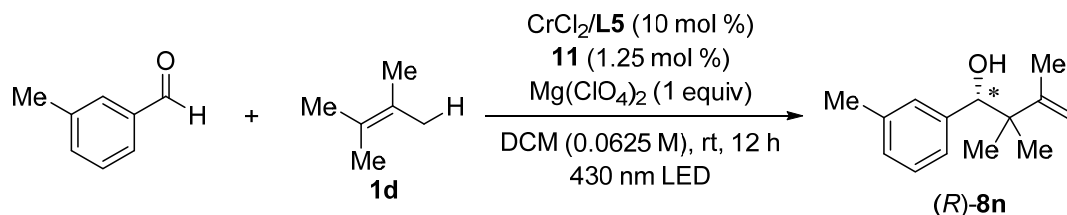

$\text{CrCl}_2$  (3.0 mg, 0.025 mmol, 10 mol %) and **L5** (9.0 mg, 0.025 mmol, 10 mol %) were dissolved in degassed  $\text{CH}_2\text{Cl}_2$  (4 mL) in a screw-capped vial under argon atmosphere and the mixture was stirred for 1 hour at room temperature. 2,3-Dimethyl-2-butene **1d** (148  $\mu\text{L}$ , 1.25 mmol, 5 eq),  $\text{Mg}(\text{ClO}_4)_2$  (55.8 mg, 0.25 mmol, 100 mol %), *m*-tolaldehyde (29  $\mu\text{L}$ , 0.25 mmol, 1 eq) and photocatalyst **11** (1.3 mg, 0.003125 mmol, 1.25 mol %) were added to the reaction mixture. The vial was subjected to 430 nm LED irradiation for 12 hours under temperature control (ca. 27–29 °C). Then, the reaction mixture was directly loaded to silica gel and purified by flash column chromatography ( $\text{CH}_2\text{Cl}_2/\text{hexane}$  = 1/10 to 1/0, v/v) to afford (S)-8n as colorless oil (43.2 mg, 85%).

**(S)-2,2,3-trimethyl-1-(*m*-tolyl)but-3-en-1-ol (8n).**

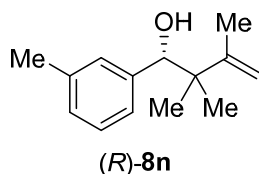

IR (neat)  $\nu$  3468, 2974, 1715, 1632, 1461, 1378, 1181, 1039, 1007, 893, 764, 738  $\text{cm}^{-1}$ ;  $^1\text{H}$  NMR ( $\text{CDCl}_3$ , 500 MHz)  $\delta$  0.94 (s, 3H), 0.99 (s, 3H), 1.87 (s, 3H), 2.05 (s, 1H), 2.36 (s, 3H), 4.60 (s, 1H), 4.97 (d,  $J$  = 1.1 Hz, 1H), 5.03 (d,  $J$  = 1.1 Hz, 1H), 7.08 (d,  $J$  = 7.4 Hz, 1H), 7.12 (d,  $J$  = 7.4 Hz, 1H), 7.16 (s, 1H), 7.20 (dd,  $J$  = 7.4, 7.4 Hz, 1H);  $^{13}\text{C}$  NMR ( $\text{CDCl}_3$ , 125 MHz)  $\delta$  19.8, 20.0, 21.5, 24.3, 44.4, 77.4, 113.1, 125.1, 127.2, 128.0, 128.6, 136.8, 140.2, 150.7; LRMS (ESI):  $m/z$  227 [ $\text{M}+\text{Na}^+$ ]; HRMS (ESI):  $m/z$  calculated for  $\text{C}_{14}\text{H}_{20}\text{NaO}^+$  [ $\text{M}+\text{Na}^+$ ]: 227.1406, found: 227.1399; HPLC (chiral column: CHIRALPAK IBN3; solvent: hexane/2-propanol = 200/1; flow rate: 1.0 mL/min; detection: at 210 nm):  $t_R$  = 16.2 min (minor) and 21.9 min (major);  $[\alpha]_D^{20}$  = +103 ( $c$  = 0.9,  $\text{CHCl}_3$ , for 90% ee sample).

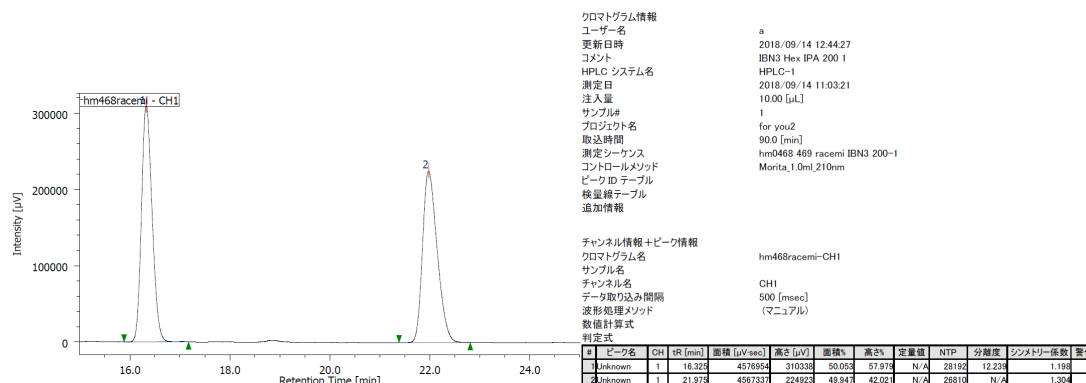

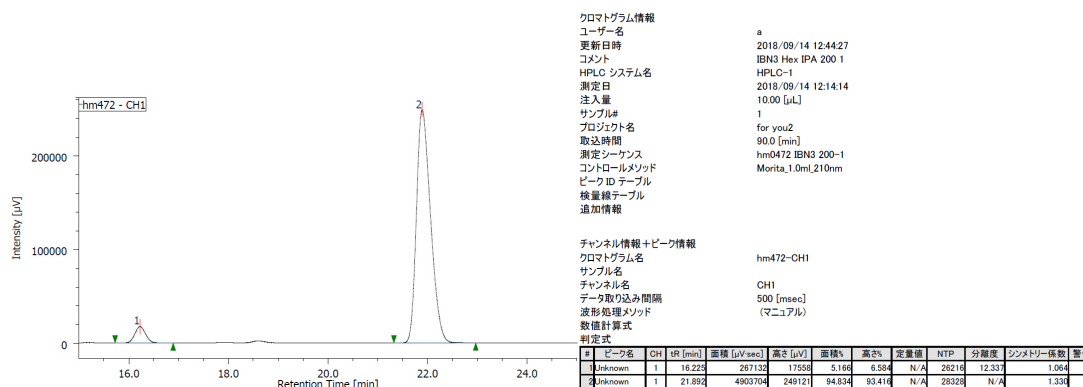

**(S)-2,2,3-trimethyl-1-(p-tolyl)but-3-en-1-ol (8o).**

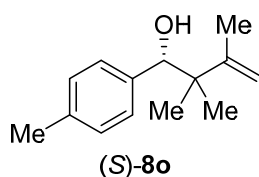

Prepared according to the general procedure, then the crude material was purified by silica gel flash column chromatography ( $\text{CH}_2\text{Cl}_2$ /hexane = 1/10 to 1/0, v/v) to afford (S)-8o as colorless oil (49.4 mg, 97%). All the spectroscopic data matches with the previously reported data.<sup>12</sup>

$^1\text{H}$  NMR ( $\text{CDCl}_3$ , 500 MHz)  $\delta$  0.93 (s, 3H), 0.98 (s, 3H), 1.86 (s, 3H), 2.03 (d,  $J$  = 1.7 Hz, 1H), 2.34 (s, 3H), 4.60 (s, 1H), 4.96 (d,  $J$  = 1.1 Hz, 1H), 5.02 (d,  $J$  = 1.1 Hz, 1H), 7.12 (d,  $J$  = 8.0 Hz, 2H), 7.22 (d,  $J$  = 8.0 Hz, 2H);  $^{13}\text{C}$  NMR ( $\text{CDCl}_3$ , 125 MHz)  $\delta$  19.8, 20.1, 21.1, 24.2, 44.4, 77.3, 113.0, 127.8, 128.1, 136.8, 137.3, 150.7; HPLC (chiral column: CHIRALPAK IA3; solvent: hexane/2-propanol = 200/1; flow rate: 1.0 mL/min; detection: at 210 nm):  $t_R$  = 15.7 min (minor) and 17.1 min (major);  $[\alpha]_D^{20}$  = +134 ( $c$  = 1.76,  $\text{CHCl}_3$ , for 95% ee sample).

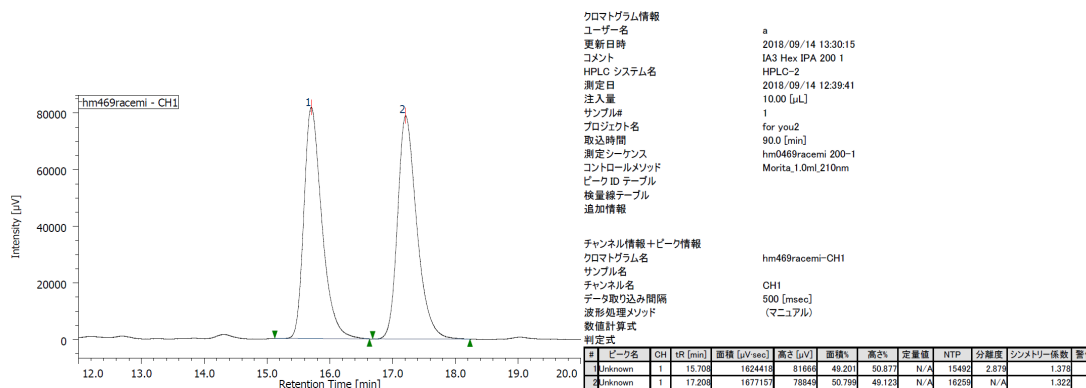

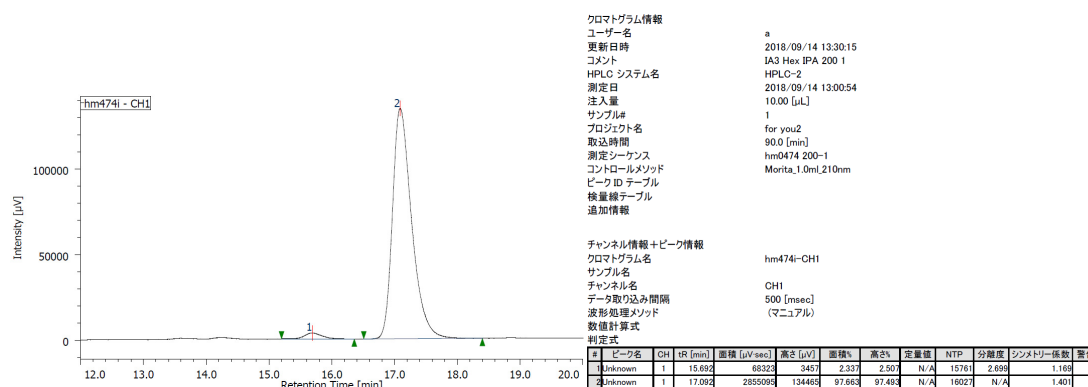

## Procedure for preparation of **8q**

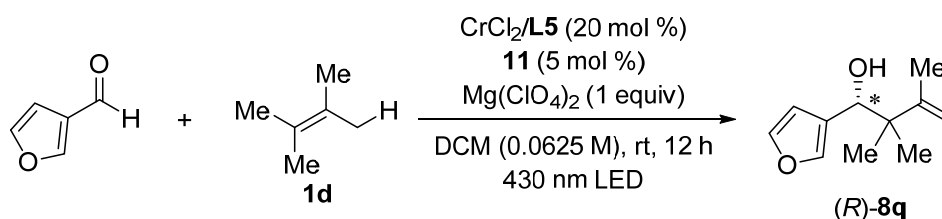

$\text{CrCl}_2$  (6.1 mg, 0.05 mmol, 20 mol %) and **L5** (17.9 mg, 0.05 mmol, 20 mol %) were dissolved in degassed  $\text{CH}_2\text{Cl}_2$  (4 mL) in a screw-capped vial under argon atmosphere and the mixture was stirred for 1 hour at room temperature. 2,3-Dimethyl-2-butene **1d** (593  $\mu\text{L}$ , 5.0 mmol, 20 eq),  $\text{Mg}(\text{ClO}_4)_2$  (55.8 mg, 0.25 mmol, 100 mol %), 3-furaldehyde (21  $\mu\text{L}$ , 0.25 mmol, 1 eq) and photocatalyst **11** (5.2 mg, 0.00125 mmol, 5 mol %) were added to the reaction mixture. The vial was subjected to 430 nm LED irradiation for 12 hours under temperature control (ca. 27–29 °C). Then, the reaction mixture was directly loaded to silica gel and purified by flash column chromatography ( $\text{CH}_2\text{Cl}_2/\text{hexane}$  = 1/10 to 1/0, v/v) to afford (*R*)-**8q** as colorless oil (14.8 mg, 33%).

### (*R*)-1-(furan-3-yl)-2,2,3-trimethylbut-3-en-1-ol (**8q**).

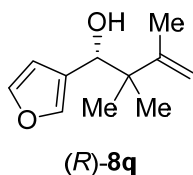

IR (neat)  $\nu$  3464, 3091, 2971, 1716, 1635, 1501, 1460, 1377, 1261, 1163, 1023, 875, 798, 736  $\text{cm}^{-1}$ ;  $^1\text{H}$  NMR ( $\text{CDCl}_3$ , 500 MHz)  $\delta$  0.98 (s, 3H), 1.05 (s, 3H), 1.83 (s, 3H), 1.93 (s, 1H), 4.61 (s, 1H), 4.95 (s, 1H), 5.01 (s, 1H), 6.39 (s, 1H), 7.35–7.39 (m, 2H);  $^{13}\text{C}$  NMR ( $\text{CDCl}_3$ , 125 MHz)  $\delta$  19.8, 20.5, 23.7, 44.2, 71.3, 110.3, 113.1, 124.9, 140.3, 142.3, 150.3; LRMS (ESI):  $m/z$  203 [ $\text{M}+\text{Na}^+$ ]; HRMS (ESI):  $m/z$  calculated for  $\text{C}_{11}\text{H}_{16}\text{NaO}_2^+$  [ $\text{M}+\text{Na}^+$ ]: 203.1043, found: 203.1040; HPLC (chiral column: CHIRALPAK IBN3; solvent: hexane/2-propanol = 100/1; flow rate: 1.0 mL/min; detection: at 210 nm):  $t_R$  = 12.1 min (major) and 13.1 min (minor);  $[\alpha]_D^{20}$  = +56 ( $c$  = 0.54,  $\text{CHCl}_3$ , for 93% ee sample).

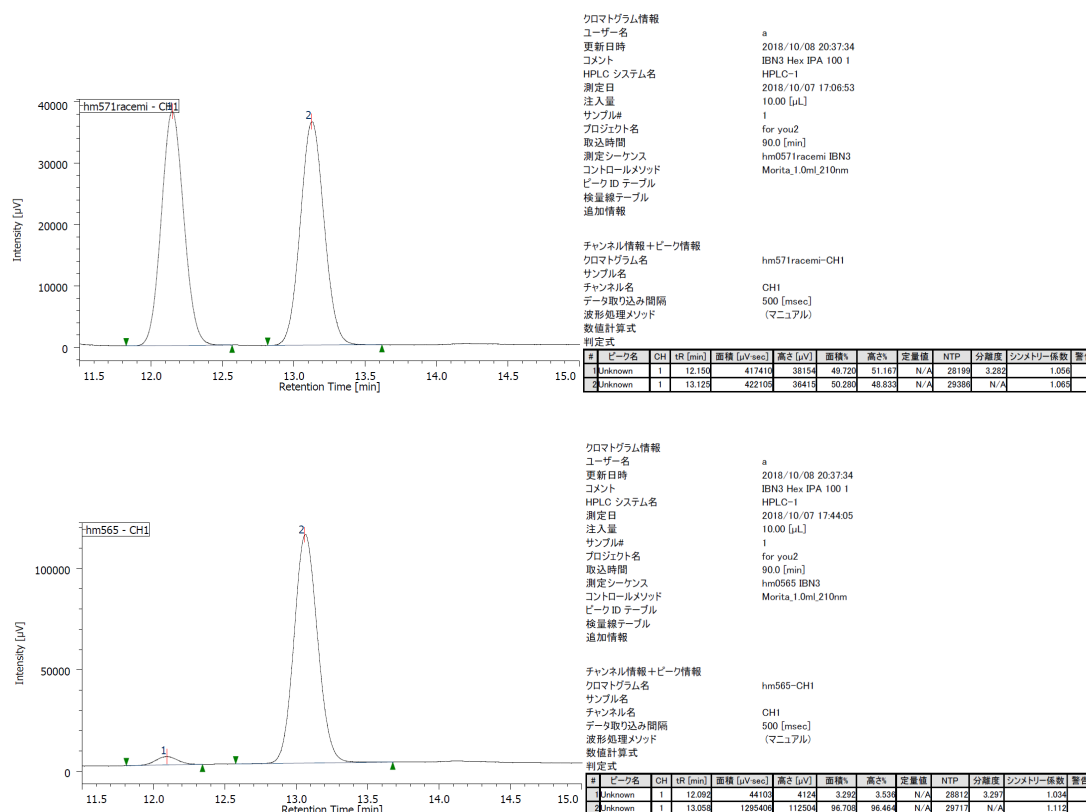

## Procedure for preparation of **8r**

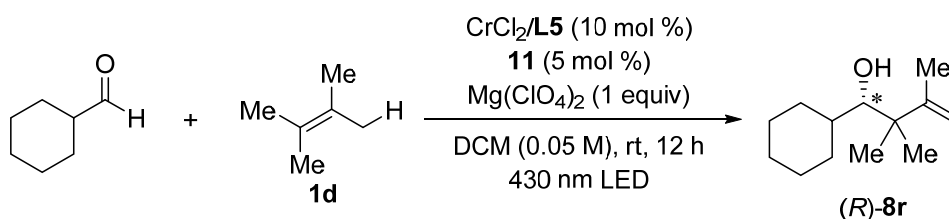

CrCl<sub>2</sub> (2.4 mg, 0.02 mmol, 20 mol %) and **L5** (7.2 mg, 0.02 mmol, 20 mol %) were dissolved in degassed 1,2-dichloroethane (4 mL) in a screw-capped vial under argon atmosphere and the mixture was stirred for 1 hour at room temperature. 2,3-Dimethyl-2-butene **1a** (119  $\mu$ L, 1.0 mmol, 5 eq), Mg(ClO<sub>4</sub>)<sub>2</sub> (44.6 mg, 0.2 mmol, 100 mol %), cyclohexanecarbaldehyde (24  $\mu$ L, 0.2 mmol, 1 eq) and photocatalyst **11** (4.1 mg, 0.01 mmol, 5 mol %) were added to the reaction mixture. The vial was subjected to 430 nm LED irradiation for 12 hours under temperature control (ca. 27–29 °C). Then, the reaction mixture was directly loaded to silica gel and purified by flash column chromatography (CH<sub>2</sub>Cl<sub>2</sub>/hexane = 1/10 to 1/0, v/v) to afford (*S*)-**8r** as colorless oil (35.5 mg, 90%).

(*S*)-1-cyclohexyl-2,2,3-trimethylbut-3-en-1-ol (**8r**).

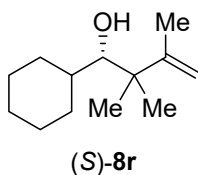

All the spectroscopic data matches with the previously reported data.<sup>10</sup> Enantiomeric excess was determined after protection of **8r** by *p*-NO<sub>2</sub>-benzoyl chloride.

<sup>1</sup>H NMR (CDCl<sub>3</sub>, 500 MHz) δ 1.06 (s, 3H), 1.08 (s, 3H), 1.19-1.37 (m, 6H), 1.43 (d, *J* = 4.6 Hz, 1H), 1.45-1.66 (m, 2H), 1.68-1.80 (m, 6H), 3.28 (dd, *J* = 2.9, 4.0 Hz, 1H), 4.83 (s, 1H), 4.87 (s, 1H); <sup>13</sup>C NMR (CDCl<sub>3</sub>, 125 MHz) δ 20.0, 22.9, 23.2, 26.4, 26.4, 26.9, 28.0, 34.0, 39.1, 44.6, 79.5, 111.7, 151.7; HPLC (chiral column: CHIRALPAK IA3; solvent: hexane/2-propanol = 200/1; flow rate: 1.0 mL/min; detection: at 254 nm): *t*<sub>R</sub> = 7.6 min (minor) and 8.8 min (major); [α]<sub>D</sub><sup>20</sup> = −49 (*c* = 1.19, CHCl<sub>3</sub>, for 99% ee sample).

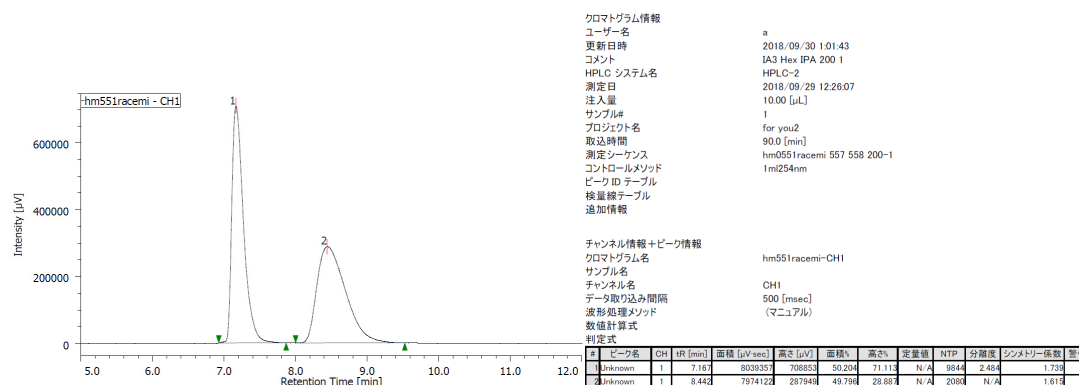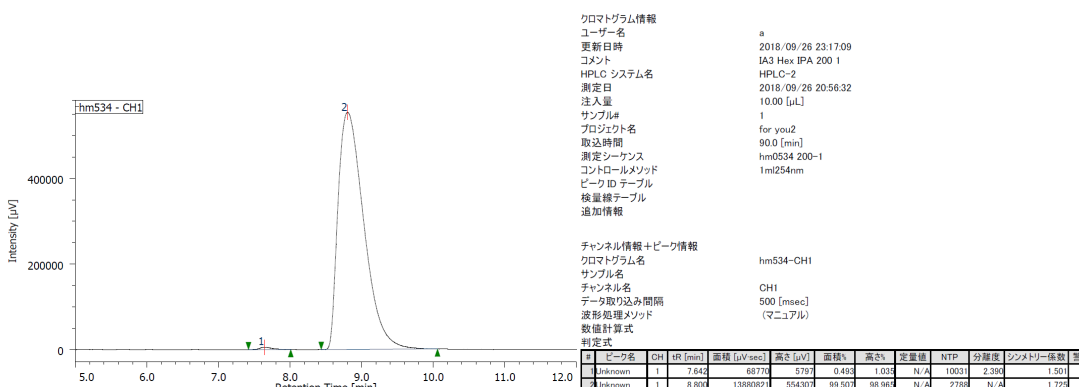

## Procedure for preparation of **8s-8u**

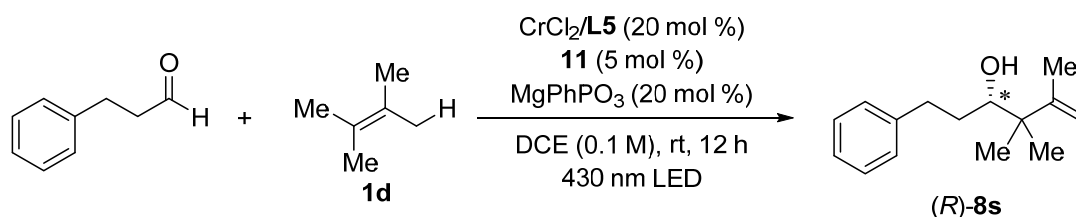

CrCl<sub>2</sub> (6.1 mg, 0.05 mmol, 20 mol %) and **L5** (17.9 mg, 0.05 mmol, 20 mol %) were dissolved in degassed

1,2-dichloroethane (2.5 mL) in a screw-capped vial under argon atmosphere and the mixture was stirred for 1 hour at room temperature. 2,3-Dimethyl-2-butene **1d** (593  $\mu$ L, 5.0 mmol, 20 eq), MgPhPO<sub>3</sub> (9.0 mg, 0.05 mmol, 20 mol %), hydrocinnamaldehyde (33  $\mu$ L, 0.25 mmol, 1 eq) and photocatalyst **11** (5.2 mg, 0.0125 mmol, 5 mol %) were added to the reaction mixture. The vial was subjected to 430 nm LED irradiation for 48 hours under temperature control (ca. 27–29 °C). Then, the reaction mixture was directly loaded to silica gel and purified by flash column chromatography (CH<sub>2</sub>Cl<sub>2</sub>/hexane = 1/10 to 1/0, v/v) to afford (*S*)-**8s** as colorless oil (33.8 mg, 69%).

**(*S*)-4,4,5-trimethyl-1-phenylhex-5-en-3-ol (8s).**

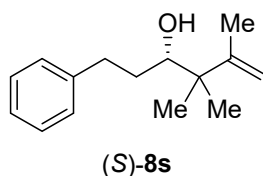

IR (neat)  $\nu$  3479, 3087, 3027, 2970, 1634, 1603, 1496, 1455, 1377, 1302, 1067, 894, 748, 699 cm<sup>-1</sup>; <sup>1</sup>H NMR (CDCl<sub>3</sub>, 500 MHz)  $\delta$  0.99 (s, 3H), 1.04 (s, 3H), 1.50–1.81 (m, 6H), 2.55–2.66 (m, 1H), 2.88–2.99 (m, 1H), 3.50 (d, *J* = 10.3 Hz, 1H), 4.84 (s, 1H), 4.90 (s, 1H), 7.15–7.32 (m, 5H); <sup>13</sup>C NMR (CDCl<sub>3</sub>, 125 MHz)  $\delta$  19.6, 21.5, 22.4, 33.0, 33.6, 43.7, 74.8, 112.1, 125.7, 128.3, 128.5, 142.5, 150.8; LRMS (DART): *m/z* 219 [M+H<sup>+</sup>]; HRMS (DART): *m/z* calculated for C<sub>15</sub>H<sub>23</sub>O<sup>+</sup> [M+H<sup>+</sup>]: 219.1743, found: 219.1753; HPLC (chiral column: CHIRALPAK IA3; solvent: hexane/2-propanol = 100/1; flow rate: 1.0 mL/min; detection: at 210 nm): *t*<sub>R</sub> = 9.2 min (minor) and 10.5 min (major); [ $\alpha$ ]<sub>D</sub><sup>20</sup> = +98 (*c* = 1.38, CHCl<sub>3</sub>, for 86% ee sample).

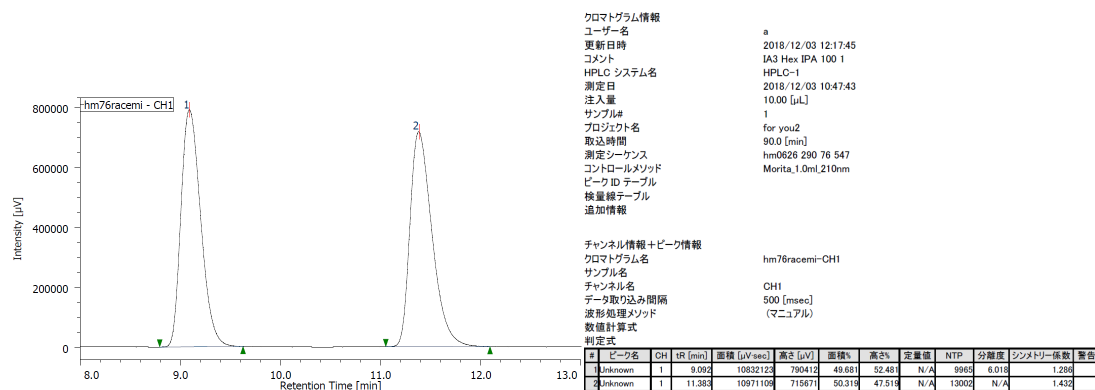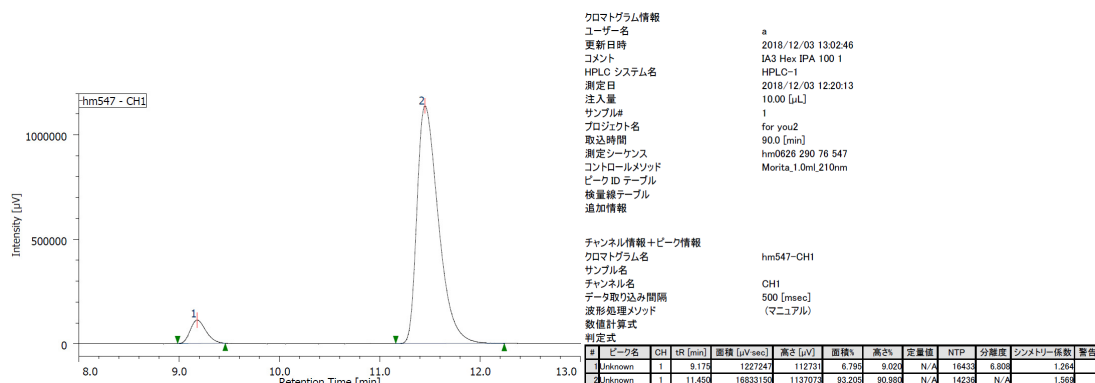

**(S)-2,3,3-trimethylnon-1-en-4-ol (8t).**

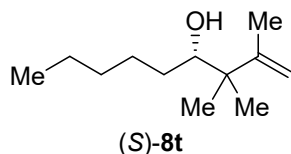

Prepared according to the general procedure, then the crude material was purified by silica gel flash column chromatography ( $\text{CH}_2\text{Cl}_2/\text{hexane} = 1/10$  to  $1/0$ , v/v) to afford (S)-8t as colorless oil (43.6 mg, 95%). Enantiomeric excess was determined after protection of 8t by *p*-NO<sub>2</sub>-benzoyl chloride.

IR (neat)  $\nu$  3446, 2928, 2856, 1732, 1635, 1457, 1377, 1289, 1120, 1073, 934, 892  $\text{cm}^{-1}$ ;  $^1\text{H}$  NMR ( $\text{CDCl}_3$ , 500 MHz)  $\delta$  0.89 (t,  $J = 6.9$  Hz, 3H), 1.00 (s, 3H), 1.04 (s, 3H), 1.18-1.37 (m, 6H), 1.38-1.47 (m, 1H), 1.47-1.63 (m, 2H), 1.75 (d,  $J = 1.1$  Hz, 3H), 3.46 (d,  $J = 10.3$  Hz, 1H), 4.84 (s, 1H), 4.91 (s, 1H);  $^{13}\text{C}$  NMR ( $\text{CDCl}_3$ , 125 MHz)  $\delta$  14.1, 19.7, 21.4, 22.6, 22.7, 27.1, 31.0, 32.0, 43.7, 75.5, 111.9, 151.1; LRMS (DART):  $m/z$  633 [ $\text{M}+\text{H}^+$ ]; HRMS (DART):  $m/z$  calculated for  $\text{C}_{12}\text{H}_{25}\text{O}^+$  [ $\text{M}+\text{H}^+$ ]: 185.1900, found: 185.1894; HPLC (chiral column: CHIRALPAK IF3; solvent: hexane/2-propanol = 200/1; flow rate: 1.0 mL/min; detection: at 254 nm):  $t_R = 7.3$  min (minor) and 9.4 min (major);  $[\alpha]_D^{20} = +70$  ( $c = 0.26$ ,  $\text{CHCl}_3$ , for 85% ee sample).

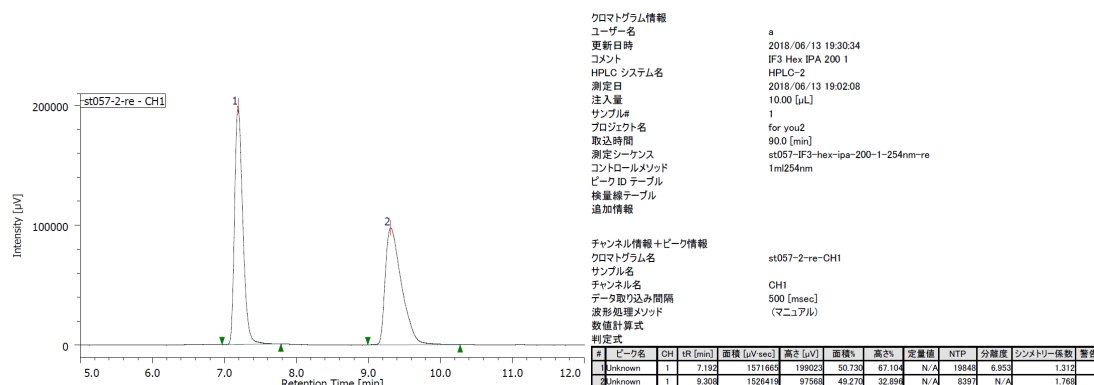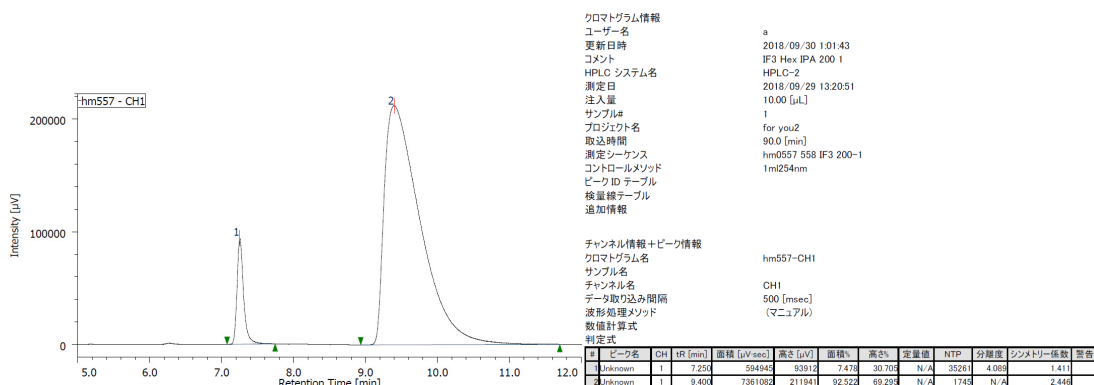

**(S)-2,3,3,6-tetramethylhept-1-en-4-ol (8u).**

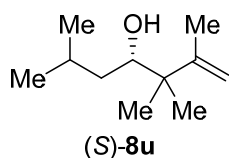

Prepared according to the general procedure, then the crude material was purified by silica gel flash column chromatography ( $\text{CH}_2\text{Cl}_2/\text{hexane} = 1/10$  to  $1/0$ , v/v) to afford (*R*)-**8u** as colorless oil (33.3 mg, 78%). Enantiomeric excess was determined after protection of **8u** by *p*- $\text{NO}_2$ -benzoylchloride.

IR (neat)  $\nu$  3408, 3091, 2957, 2970, 1635, 1468, 1377, 1296, 1069, 983, 893  $\text{cm}^{-1}$ ;  $^1\text{H}$  NMR ( $\text{CDCl}_3$ , 500 MHz)  $\delta$  0.90 (t,  $J = 6.3$  Hz, 3H), 0.94 (t,  $J = 6.9$  Hz, 3H), 0.99 (s, 3H), 1.04 (s, 3H), 1.10-1.18 (m, 1H), 1.22-1.32 (m, 1H), 1.46 (d,  $J = 2.2$  Hz, 1H), 1.73-1.85 (m, 4H), 3.56 (dd,  $J = 2.2, 10.3$  Hz, 1H), 4.84 (s, 1H), 4.90 (s, 1H);  $^{13}\text{C}$  NMR ( $\text{CDCl}_3$ , 125 MHz)  $\delta$  14.1, 19.7, 21.4, 22.6, 22.7, 27.1, 31.0, 32.0, 43.7, 75.5, 111.9, 151.1; LRMS (ESI):  $m/z$  193 [ $\text{M}+\text{Na}^+$ ]; HRMS (ESI):  $m/z$  calculated for  $\text{C}_{11}\text{H}_{22}\text{NaO}^+$  [ $\text{M}+\text{Na}^+$ ]: 193.1563, found: 193.1570; HPLC (chiral column: CHIRALPAK IF3; solvent: hexane/2-propanol = 200/1; flow rate: 1.0 mL/min; detection: at 254 nm):  $t_R = 7.2$  min (minor) and 8.3 min (major);  $[\alpha]_D^{20} = +116$  ( $c = 0.84$ ,  $\text{CHCl}_3$ , for 85% ee sample).

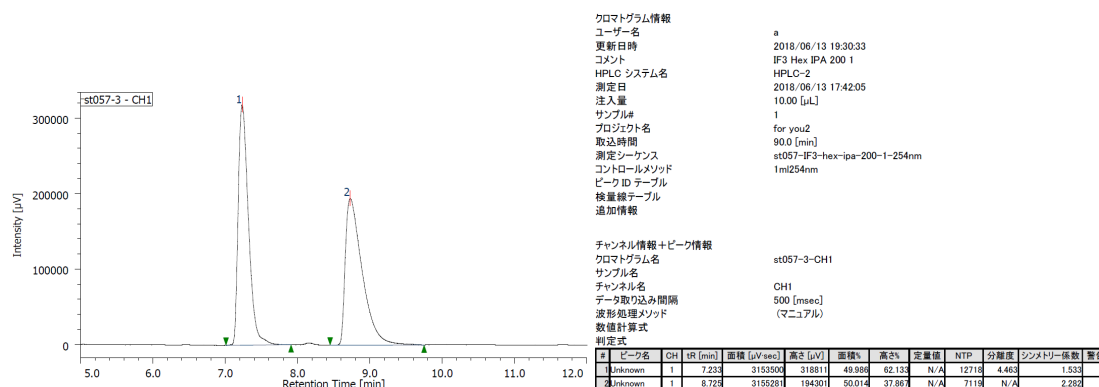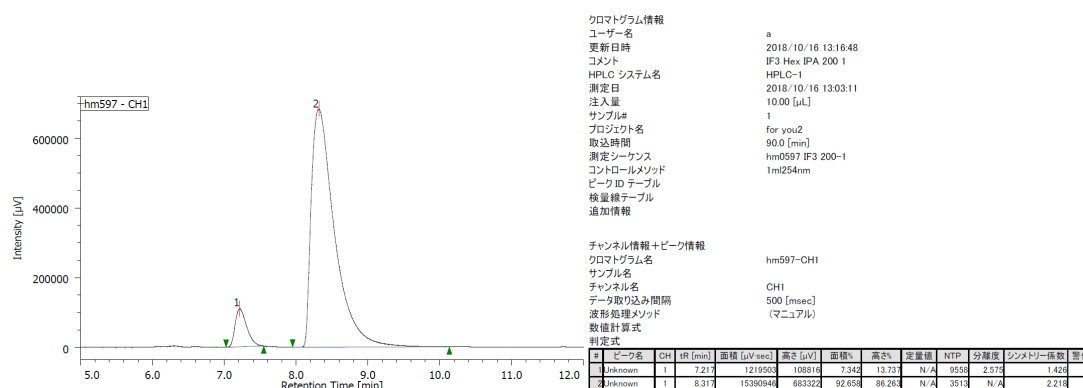

## Determination of absolute configuration

The absolute configurations of **8** were determined as follows:

**8a-8k**: The absolute configuration was determined by optical rotation value of **8b**. Those of others were assigned by analogy.

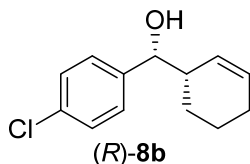

This time:  $[\alpha]_D^{20} = -24.6$  ( $c = 1.0$ ,  $C_6H_6$ , for 99% ee sample)

Reported value<sup>13</sup>:  $[\alpha]_D^{20} = -15.0$  ( $c = 1.0$ ,  $C_6H_6$ , for 64% ee sample)

**8l-8v**: Following the following reaction scheme, diol **12** was obtained. The absolute configuration was determined by optical rotation value of diol **12**. Those of others were assigned by analogy.

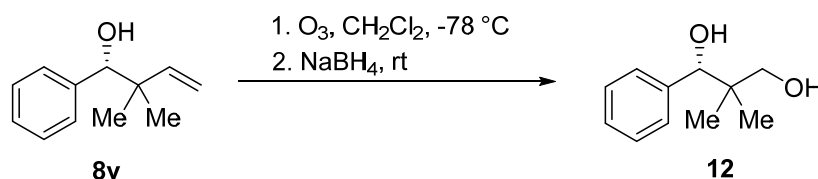

**8v** (38 mg, 0.216 mmol, 1 eq, 83% ee) were dissolved in  $CH_2Cl_2$  (2 mL) in a round bottom flask. Then the flask was connected to an oxygen tank with a bubbler. The reaction mixture was cooled to  $-78\text{ }^\circ\text{C}$ . The ozone generator was switched on and the ozone went into the reaction flask. The reaction mixture was allowed to stir until the color changed to blue.  $NaBH_4$  (16.8 mg, 0.431 mmol, 2 eq) and MeOH (1 mL) were added and the mixture was warmed up to room temperature. The reaction mixture was stirred for 15 h, and then quenched with saturated aq.  $NH_4Cl$ . The organic layer was separated, and the aqueous layer was further extracted three times with AcOEt. The combined organic layer was washed with water and brine and dried over  $Na_2SO_4$ . After the evaporation under reduced pressure, the residue was purified by silica gel flash column chromatography (hexane/AcOEt = 3/1 to 1/1, v/v) to give the desired diol **9** (30.2 mg, 78% yield) as a colorless oil.  $[\alpha]_D^{20} = +65.9$  ( $c = 2.5$ ,  $CHCl_3$ , for 83% ee sample)

Reported optical rotation value<sup>14</sup>:  $[\alpha]_D^{30} = +44.7$  ( $c = 1.0$ ,  $CHCl_3$ , for 99% ee sample)

#### 4. Optimization Study for Aliphatic Aldehydes

During the optimization of racemic reaction, DCE solvent was found to be better solvent than DCM in terms of reactivity.

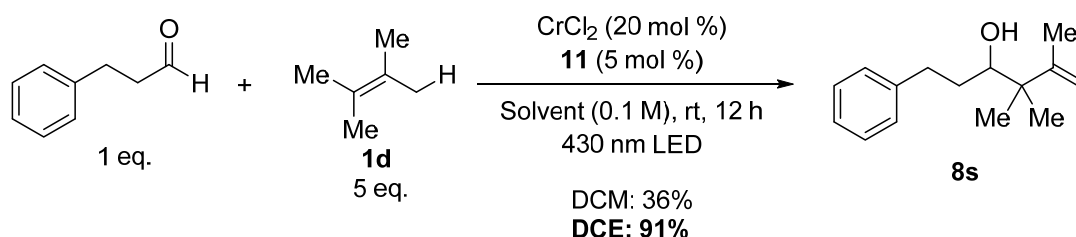

Addition of  $MgPhPO_3$  was effective for improving enantioselectivity, while the reaction rate was slower than in the presence of  $Mg(ClO_4)_2$ . 48 hours was required for the completion of the reaction.

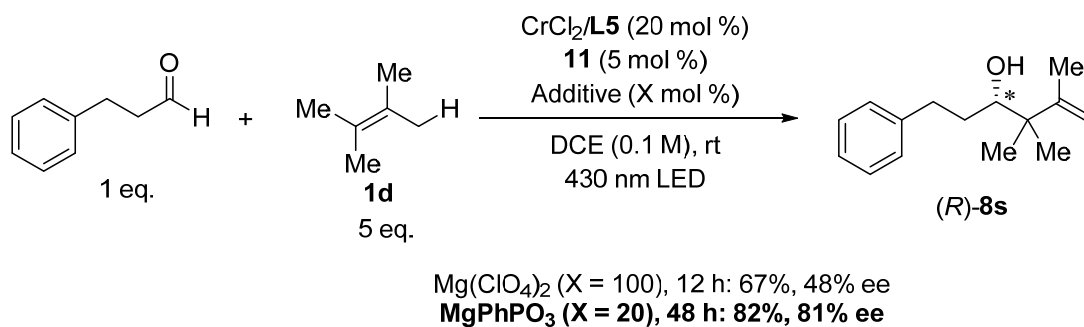

## 5. Mechanistic Study

### 5.1 Redox potentials of intermediates in catalytic cycle

We assumed that the proposed catalytic cycle (Figure 2 in the text) is feasible based on the following redox potentials of intermediates. Although oxidation potential of cyclohexene is higher than that of excited state of photocatalyst **10**, one electron transfer would be possible based on the related precedent (cyclopentene and photocatalyst **11**).<sup>15</sup> In addition, addition of Mg(ClO<sub>4</sub>)<sub>2</sub> might facilitate this step by stabilizing ion pair **3** (see ref 20 in the text).

Cyclohexene **1a**: [**1a**/**3**] = +2.37 V versus SCE<sup>16</sup>

Photocatalyst **10**: [D-Acr<sup>•</sup>/D-Acr<sup>+</sup>] = +2.24 V versus SCE, [D-Acr<sup>+</sup>/D-Acr<sup>•</sup>] = -0.46 V versus SCE<sup>17</sup>

Cr catalyst: [Cr(III)/Cr(II)] = -0.41 V versus SCE<sup>18</sup>

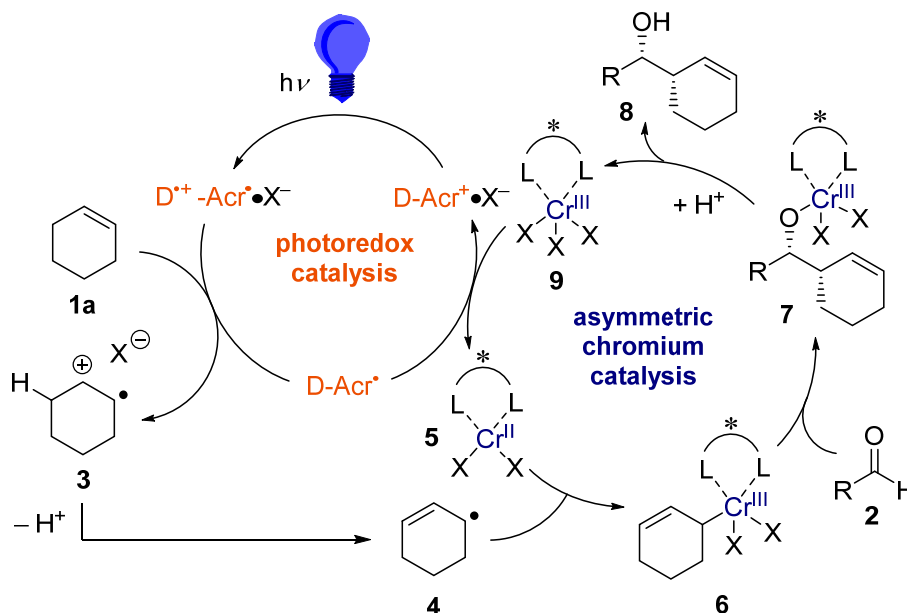

### 5.2 TEMPO trapping experiment

To confirm the generation of an allyl radical, a radical trapping experiment by the addition of TEMPO (2,2,6,6-tetramethyl-1-piperidinyloxy, free radical) was conducted.

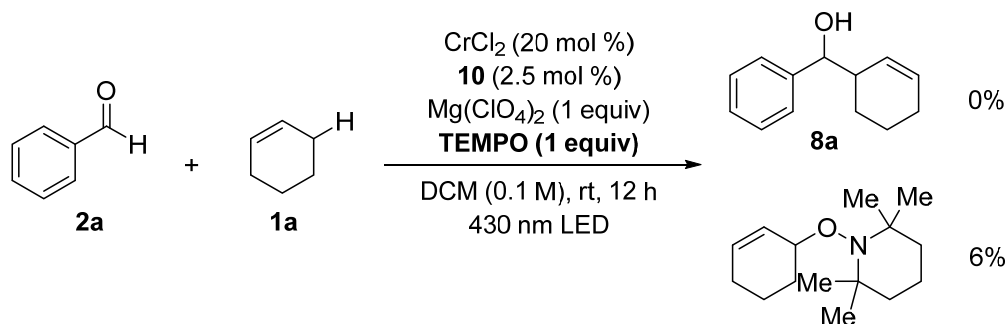

$\text{CrCl}_2$  (6.1 mg, 0.05 mmol, 20 mol %), cyclohexene **1a** (507  $\mu\text{L}$ , 5.0 mmol, 20 eq), benzaldehyde **2a** (25.5  $\mu\text{L}$ , 0.25 mmol, 1 eq),  $\text{Mg}(\text{ClO}_4)_2$  (55.8 mg, 0.25 mmol, 100 mol %) and photocatalyst **10** (2.5 mg, 0.00625 mmol, 2.5 mol %) were dissolved in degassed  $\text{CH}_2\text{Cl}_2$  (2.5 mL) in a screw-capped vial under argon atmosphere at room temperature. Then, TEMPO (39.1 mg, 0.25 mmol, 1 eq) were added to the reaction mixture. The vial was subjected to 430 nm LED irradiation for 12 hours under temperature control (ca. 27–29  $^\circ\text{C}$ ). Then, the reaction mixture was passed through a pad of silica gel with  $\text{CH}_2\text{Cl}_2$ . After evaporation, the crude mixture was analyzed by NMR spectroscopy using 1,1,2,2-tetrachloroethane as internal standard. No desired product **8a** was formed, and TEMPO adduct<sup>19</sup> was detected in 6% NMR yield. Therefore, we assume allyl radical is formed as an intermediate of the reaction.

### 5.3 Radical clock experiment

To deny the involvement of ketyl radicals, a radical clock experiment was performed using 2-phenylcyclopropylcarbaldehyde as electrophile.

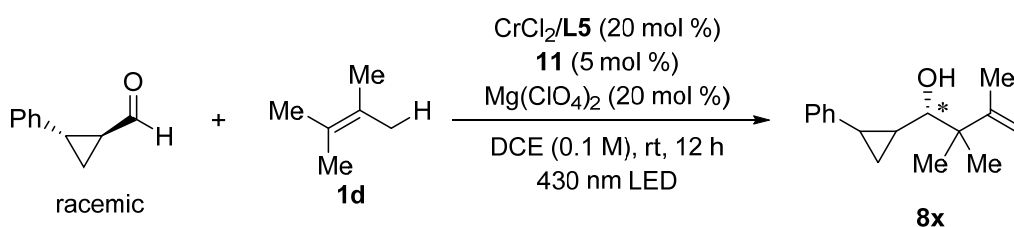

$\text{CrCl}_2$  (6.1 mg, 0.05 mmol, 20 mol %) and **L5** (17.9 mg, 0.05 mmol, 20 mol %) were dissolved in degassed 1,2-dichloroethane (2.5 mL) in a screw-capped vial under argon atmosphere and stirred for 1 hour at room temperature. 2,3-Dimethyl-2-butene **1d** (119  $\mu\text{L}$ , 1.0 mmol, 5 eq),  $\text{Mg}(\text{ClO}_4)_2$  (11.2 mg, 0.05 mmol, 20 mol %), 2-phenylcyclopropylcarbaldehyde<sup>20</sup> (33  $\mu\text{L}$ , 0.25 mmol, 1 eq) and photocatalyst **11** (5.2 mg, 0.0125 mmol, 5 mol %) were added to the reaction mixture. The vial was subjected to 430 nm LED irradiation for 12 hours under temperature control (ca. 27–29  $^\circ\text{C}$ ). Then, the reaction mixture was passed through a pad of silica gel with a  $\text{CH}_2\text{Cl}_2$  eluent. After evaporation, the crude mixture was analyzed by NMR spectroscopy using 1,1,2,2-tetrachloroethane as internal standard. Desired product **8x** was formed (77%, 1.1/1 dr), and no ring opened product was observed. Therefore, we assume that ketyl radicals are not formed in the reaction.

#### 5.4 Alternative pathway of chirality induction

We studied a feasibility of an alternative asymmetric induction mechanism involving in situ-generated  $\text{Mg}(\text{ClO}_4)_2/\text{L5}$  as chiral Lewis acid by premixing  $\text{Mg}(\text{ClO}_4)_2$  and **L5**. However, the desired reaction did not proceed at all, indicating that **L5** remains coordinating to the chromium atom.

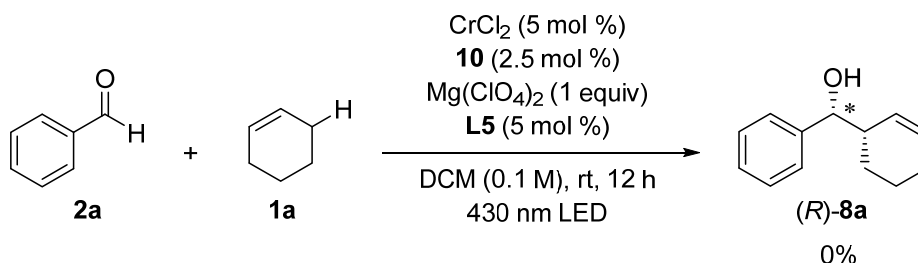

$\text{Mg}(\text{ClO}_4)_2$  (55.8 mg, 0.25 mmol, 100 mol %) and **L5** (4.5 mg, 0.0125 mmol, 5 mol %) were dissolved in degassed  $\text{CH}_2\text{Cl}_2$  (2.5 mL) in a screw-capped vial under argon atmosphere and the mixture was stirred for 1 hour at room temperature. Cyclohexene **1a** (507  $\mu\text{L}$ , 5.0 mmol, 20 eq),  $\text{CrCl}_2$  (1.5 mg, 0.0125 mmol, 5 mol %), benzaldehyde **2a** (25.5  $\mu\text{L}$ , 0.25 mmol, 1 eq) and photocatalyst **10** (2.5 mg, 0.00625 mmol, 2.5 mol %) were added to the reaction mixture. The vial was subjected to 430 nm LED irradiation for 12 hours under temperature control (ca. 27–29 °C). Then, the reaction mixture was passed through a pad of silica gel with  $\text{CH}_2\text{Cl}_2$ . After evaporation, the crude mixture was analyzed by NMR. However, no desired product **8a** was observed. Therefore, we assume that the asymmetric induction is not due to  $\text{Mg}(\text{ClO}_4)_2/\text{L5}$ , but due to  $\text{CrCl}_2/\text{L5}$ .

#### 5.5 Transient absorption analysis

Nanosecond time-resolved transient absorption measurements were carried out using the laser system provided by UNISOKU Co., Ltd. Measurements of nanosecond transient absorption spectrum were performed according to the following procedure. A deaerated solution containing a sample in a quartz cell (1 cm  $\times$  1 cm) was excited by a Nd:YAG laser (Continuum SLII-10, 4-6 ns fwhm,  $\lambda_{\text{ex}} = 355$  nm, 5 mJ/pulse). The photodynamics were monitored by continuous exposure to a xenon lamp (150 W) as a probe light and a photomultiplier tube (Hamamatsu 2949) as a detector. The solution in a quartz cuvette was deoxygenated by nitrogen purging for 10 min prior to measurements. In following experiments, the sample containing  $\text{Mg}(\text{ClO}_4)_2$  was prepared using saturated  $\text{Mg}(\text{ClO}_4)_2$  solution in DCM. ( $\text{Mg}(\text{ClO}_4)_2$  (2 mg) was added to DCM (10 ml) and sonicated 30 min at room temperature. The supernatant was used as saturated  $\text{Mg}(\text{ClO}_4)_2$  solution in DCM.)

## 6. References

- 1) C. Chen, K. Tagami, Y. Kishi, *J. Org. Chem.* **1995**, 60, 5386.

- 2) W. Chen, Q. Yang, T. Zhou, Q. Tian, G. Zhang, *Org. Lett.* **2015**, *17*, 5236.
- 3) M. Kurosu, M. -H. Lin, Y. Kishi, *J. Am. Chem. Soc.* **2004**, *126*, 12248.
- 4) J. L. Hofstra, A. H. Cherney, C. M. Ordner, S. E. Reisman, *J. Am. Chem. Soc.* **2018**, *140*, 139.
- 5) M. Hatano, K. Moriyama, T. Maki, K. Ishihara, *Angew. Chem. Int. Ed.* **2010**, *49*, 3823.
- 6) A. G. Griesbeck, S. Stadtmüller, *J. Am. Chem. Soc.* **1991**, *113*, 6923.
- 7) G. P. Howell, A. J. Minnaard, B. L. Feringa, *Org. Biomol. Chem.* **2006**, *4*, 1278.
- 8) W. Wang, T. Zhang, M. Shi, *Organometallics* **2009**, *28*, 2640.
- 9) H. C. Brown, K. S. Bhat, P. K. Jadhav, *J. Chem. Soc., Perkin Trans. 1*, **1991**, *0*, 2633.
- 10) M. Kimura, D. Nojiri, M. Fukushima, S. Oi, Y. Sonoda, Y. Inoue, *Org. Lett.* **2009**, *11*, 3794.
- 11) a) E. Skucas, J. F. Bower, M. J. Krische, *J. Am. Chem. Soc.* **2007**, *129*, 12678. b) F. Amemiya, K. Fuse, T. Fuchigamia, M. Atobe, *Chem. Commun.* **2010**, *46*, 2730.
- 12) N. Hayashi, H. Honda, M. Yasuda, I. Shibata, A. Baba, *Org. Lett.* **2006**, *8*, 4553.
- 13) W. Wang, T. Zhang, M. Shi, *Organometallics* **2009**, *28*, 2640.
- 14) T. Ichibakase, M. Nakajima, *Org. Lett.* **2011**, *13*, 1579.
- 15) R. Zhou, H. Liu, H. Tao, X. Yu, J. Wu, *Chem. Sci.* **2017**, *8*, 4654.
- 16) H. G. Roth, N. A. Romero, D. A. Nicewicz, *Synlett* **2016**, *27*, 714.
- 17) T. Tsudaka, H. Kotani, K. Ohkubo, T. Nakagawa, N. V. Tkachenko, H. Lemmetyinen, S. Fukuzumi, *Chem. Eur. J.* **2017**, *23*, 1306.
- 18) A. Fürstner, N. Shi, *J. Am. Chem. Soc.* **1996**, *118*, 12349.
- 19) L. Li, Z. Yu, Z. Shen, *Adv. Synth. Catal.* **2015**, *357*, 3495.
- 20) A. Weber, K. Doehl, J. Sachs, A. C. M. Nordschild, D. Schroeder, A. Kulik, T. Fischer, L. Schmitt, N. Teusch, J. Pietruszka, *Biomol. Med. Chem.* **2017**, *25*, 6115.

## 7. NMR Charts

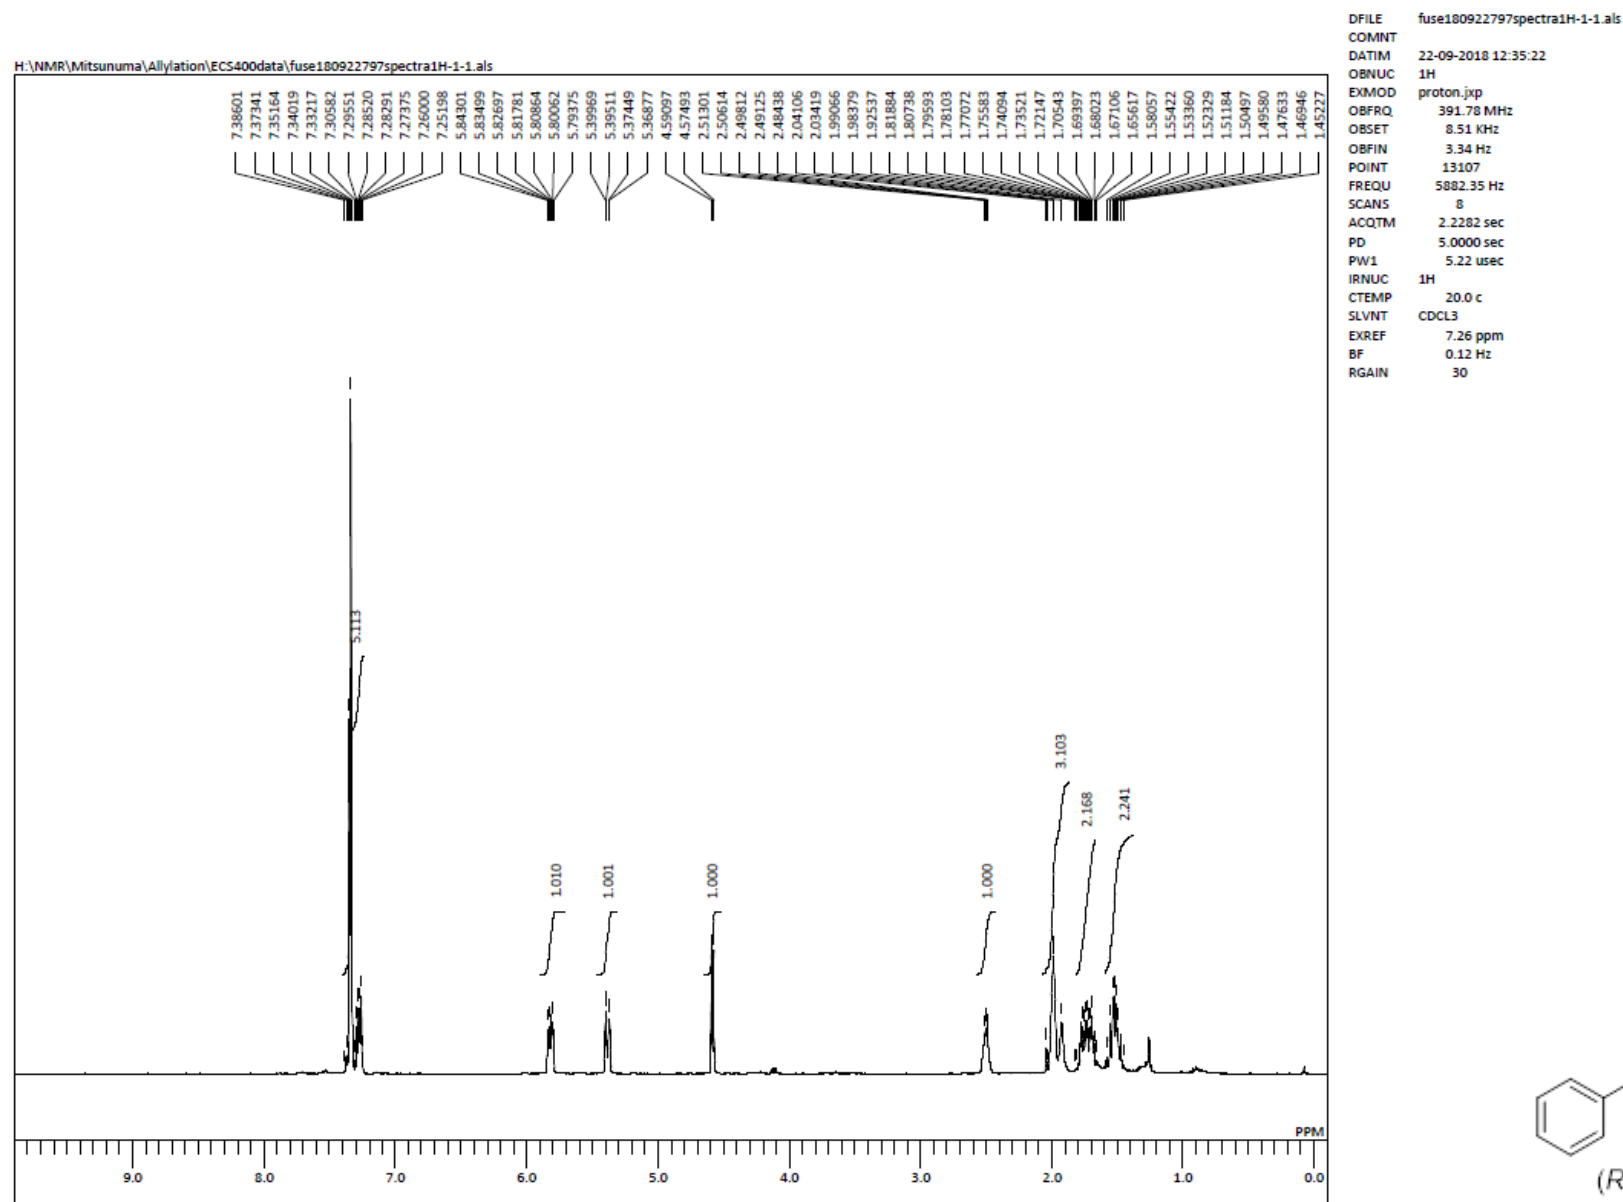

H:\NMR\Mitsunuma\Allylation\ECS400data\fuse180922797spectra13C-1-1.als

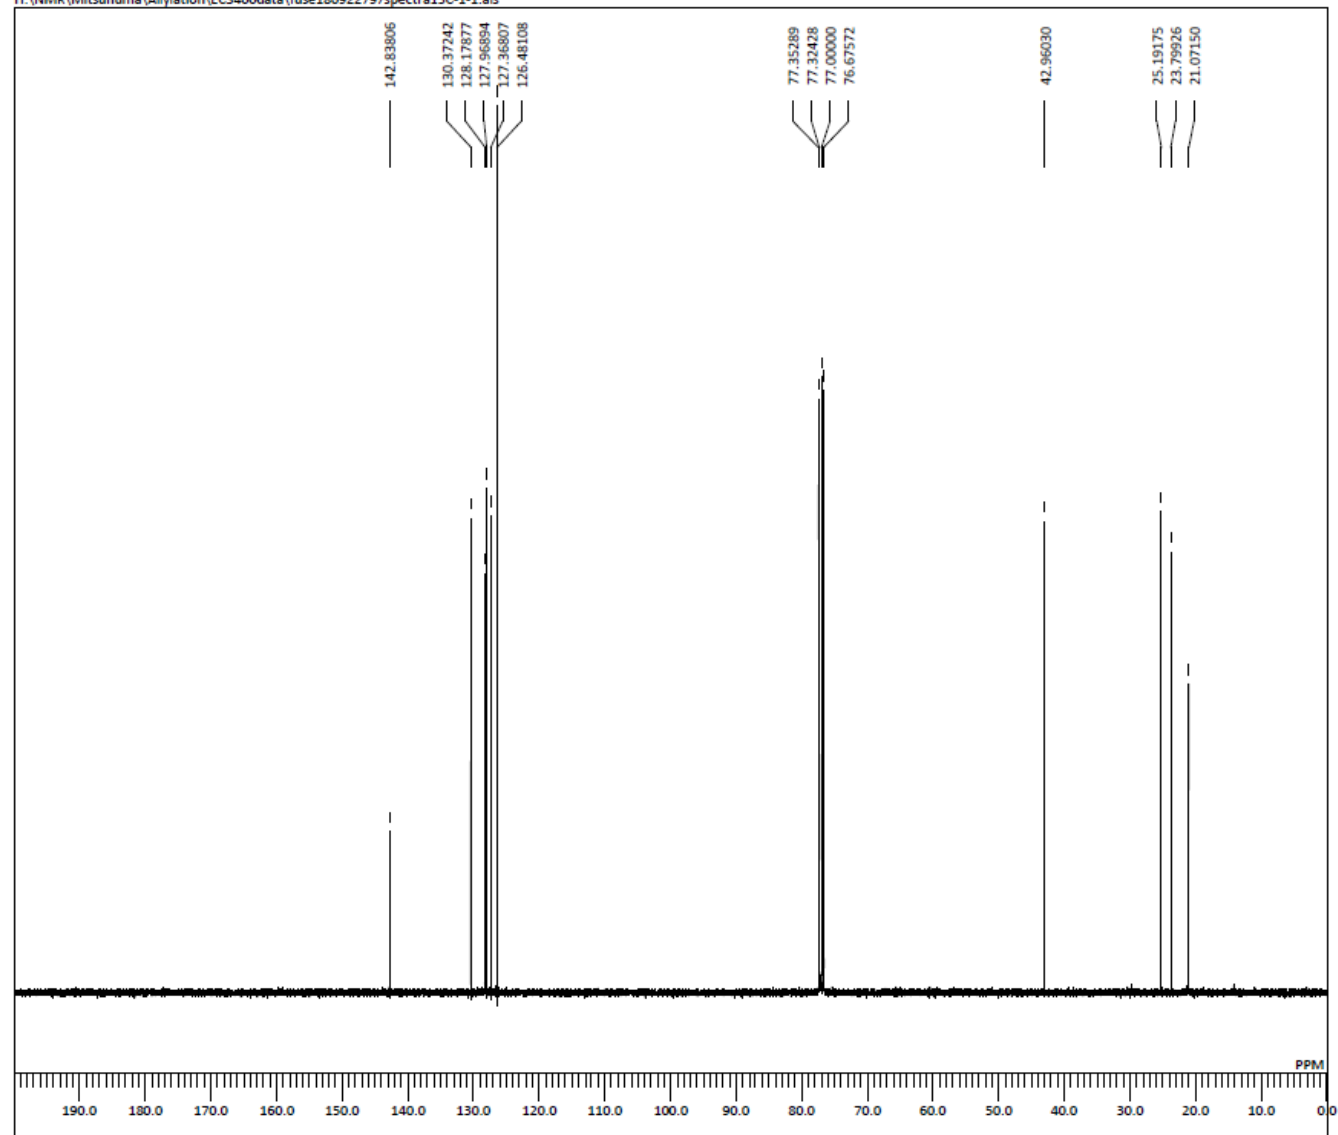

DFILE fuse180922797spectra13C-1-1.als  
 COMMT  
 DATIM 22-09-2018 12:37:14  
 OBNUC 13C  
 EXMOD carbon.jpg  
 OBFREQ 98.52 MHz  
 OBSET 4.64 KHz  
 OBFIN 8.74 Hz  
 POINT 26214  
 FREQU 24630.54 Hz  
 SCANS 1693  
 ACQTM 1.0643 sec  
 PD 2.0000 sec  
 PW1 3.12 usec  
 IRNUC 1H  
 CTEMP 20.3 c  
 SLVNT CDCL3  
 EXREF 77.00 ppm  
 BF 0.12 Hz  
 RGAIN 60

C:\Users\alice\Desktop\Gousei\mitsunuma\hm0500tm-1-1.als

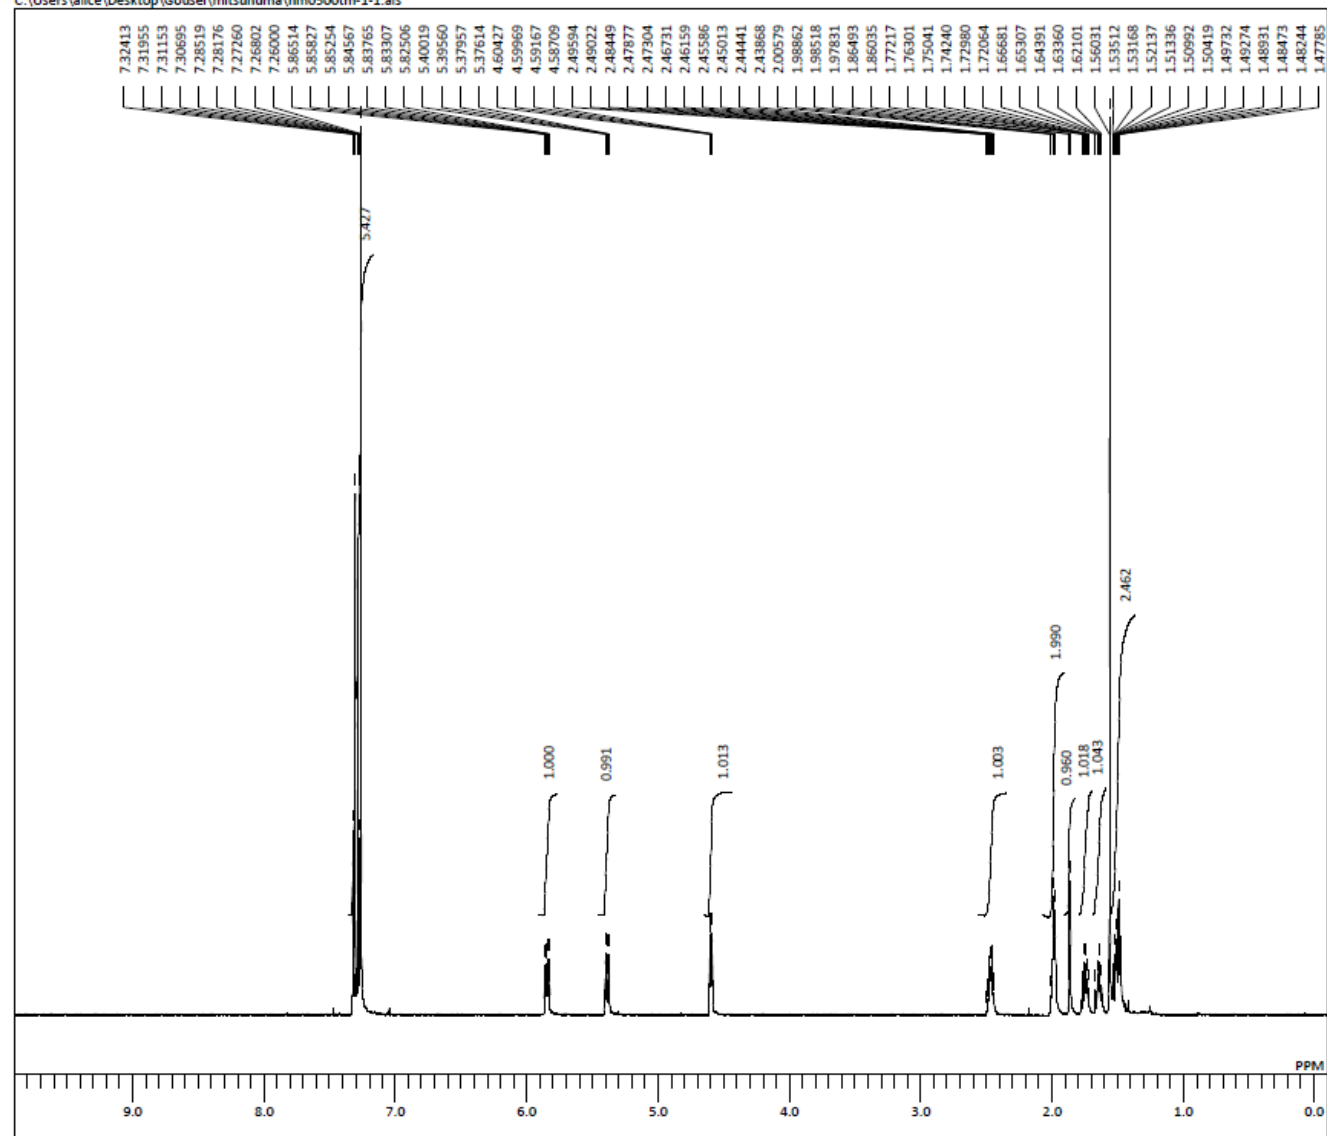

DFILE hm0500tm-1-1.als  
 COMMT  
 DATIM 2018-09-17 17:08:10  
 OBNUC 1H  
 EXMOD proton.jxp  
 OBFREQ 500.16 MHz  
 OBSET 2.41 KHz  
 OBFIN 6.01 Hz  
 POINT 13107  
 FREQU 7507.51 Hz  
 SCANS 8  
 ACQTM 1.7459 sec  
 PD 5.0000 sec  
 PW1 5.55 usec  
 IRNUC 1H  
 CTEMP 21.5 c  
 SLVNT CDCL3  
 EXREF 7.26 ppm  
 BF 0.12 Hz  
 RGAIN 34

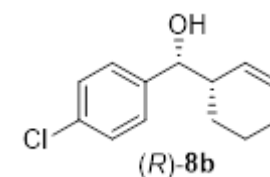

C:\Users\alice\Desktop\Gousei\mitsunuma\hm0500tm 13C-1-1.als

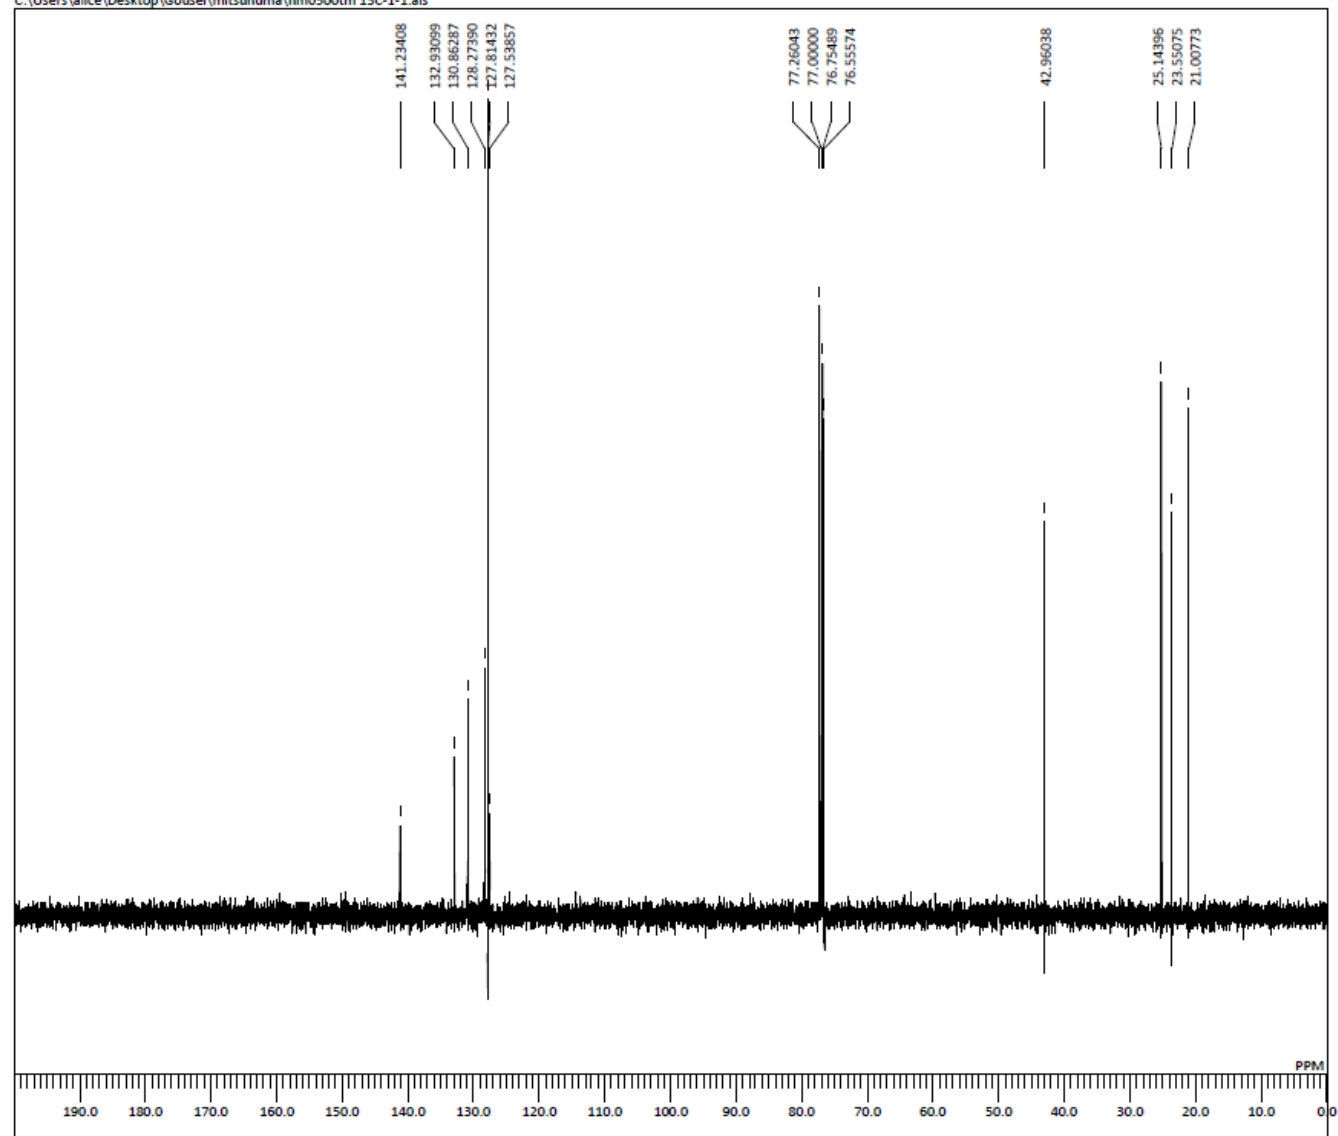

DFILE hm0500tm 13C-1-1.als  
COMNT  
DATIM 2018-09-17 18:38:12  
OBNUC 13C  
EXMOD carbon.jpg  
OBFREQ 125.77 MHz  
OBSET 1.58 kHz  
OBFIN 5.95 Hz  
POINT 26214  
FREQU 50505.05 Hz  
SCANS 33  
ACQTM 0.5190 sec  
PD 2.0000 sec  
PW1 3.40 usec  
IRNUC 1H  
CTEMP 21.8 c  
SLVNT CDCL3  
EXREF 77.00 ppm  
BF 0.12 Hz  
RGAIN 58

C:\Users\alice\Desktop\Gousei\mitsunuma\hm0489tm-1-1.als

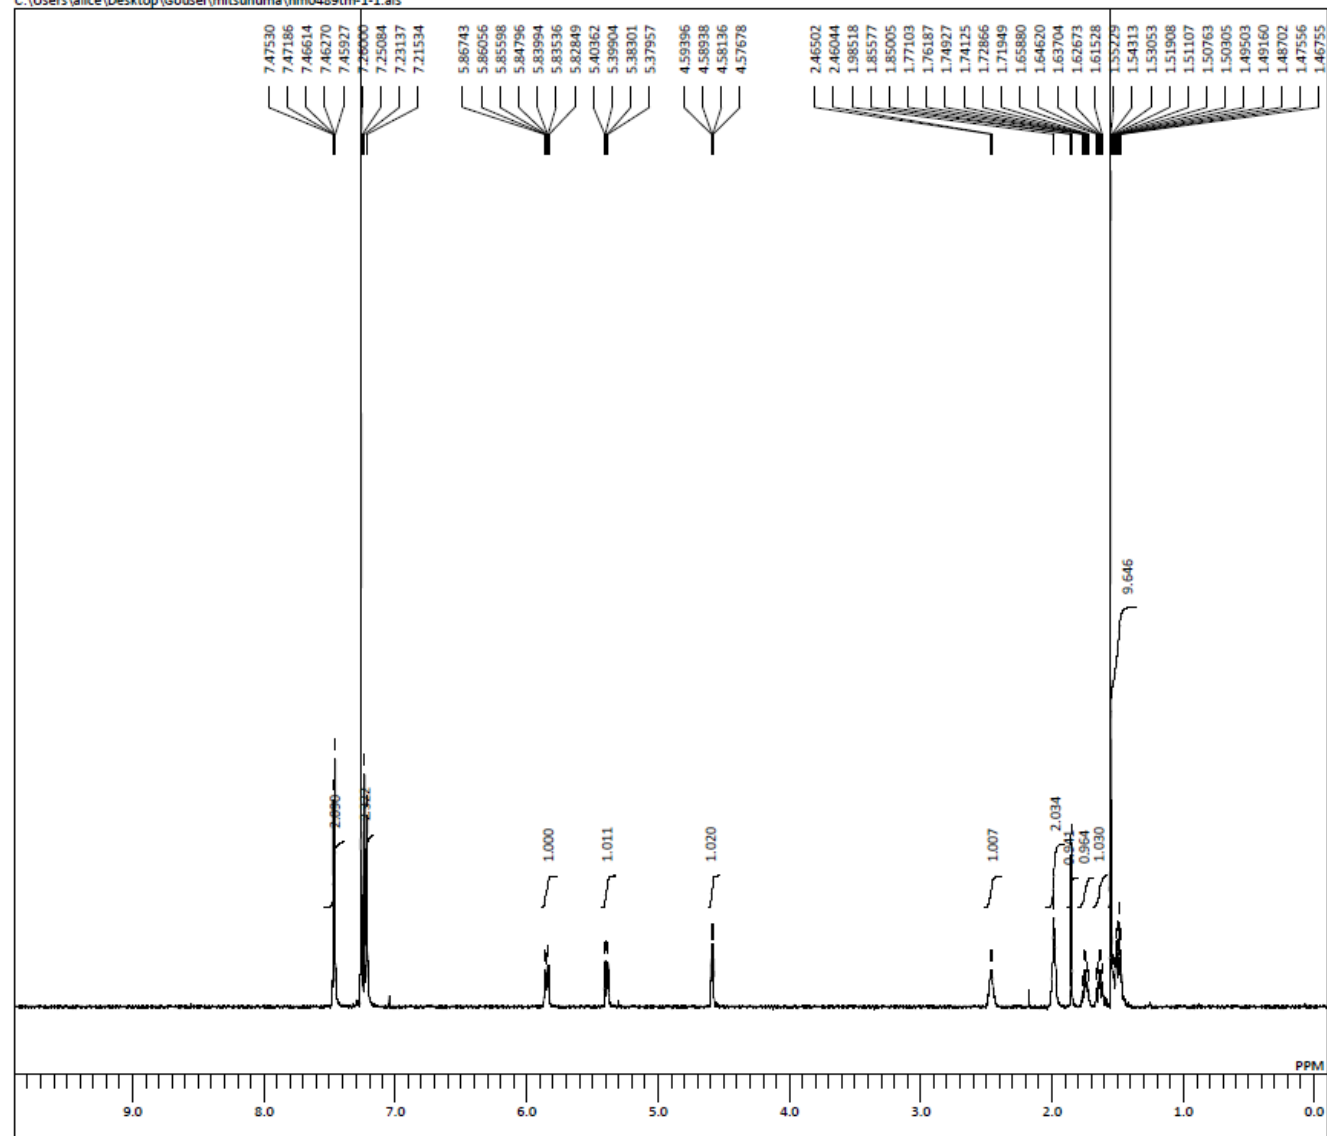

DFILE hm0489tm-1-1.als  
 COMMT  
 DATIM 2018-09-16 23:30:58  
 OBNUC 1H  
 EXMOD proton.jpg  
 OBFREQ 500.16 MHz  
 OBSET 2.41 KHz  
 OBFIN 6.01 Hz  
 POINT 13107  
 FREQU 7507.51 Hz  
 SCANS 8  
 ACQTM 1.7459 sec  
 PD 5.0000 sec  
 PW1 5.55 usec  
 IRNUC 1H  
 CTEMP 21.7 c  
 SLVNT CDCL3  
 EXREF 7.26 ppm  
 BF 0.12 Hz  
 RGAIN 34

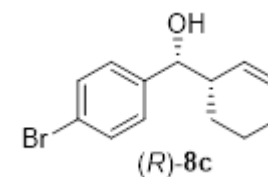

C:\Users\alice\Desktop\Gousei\mitsunuma\hm0489tm 13C-1-1.als

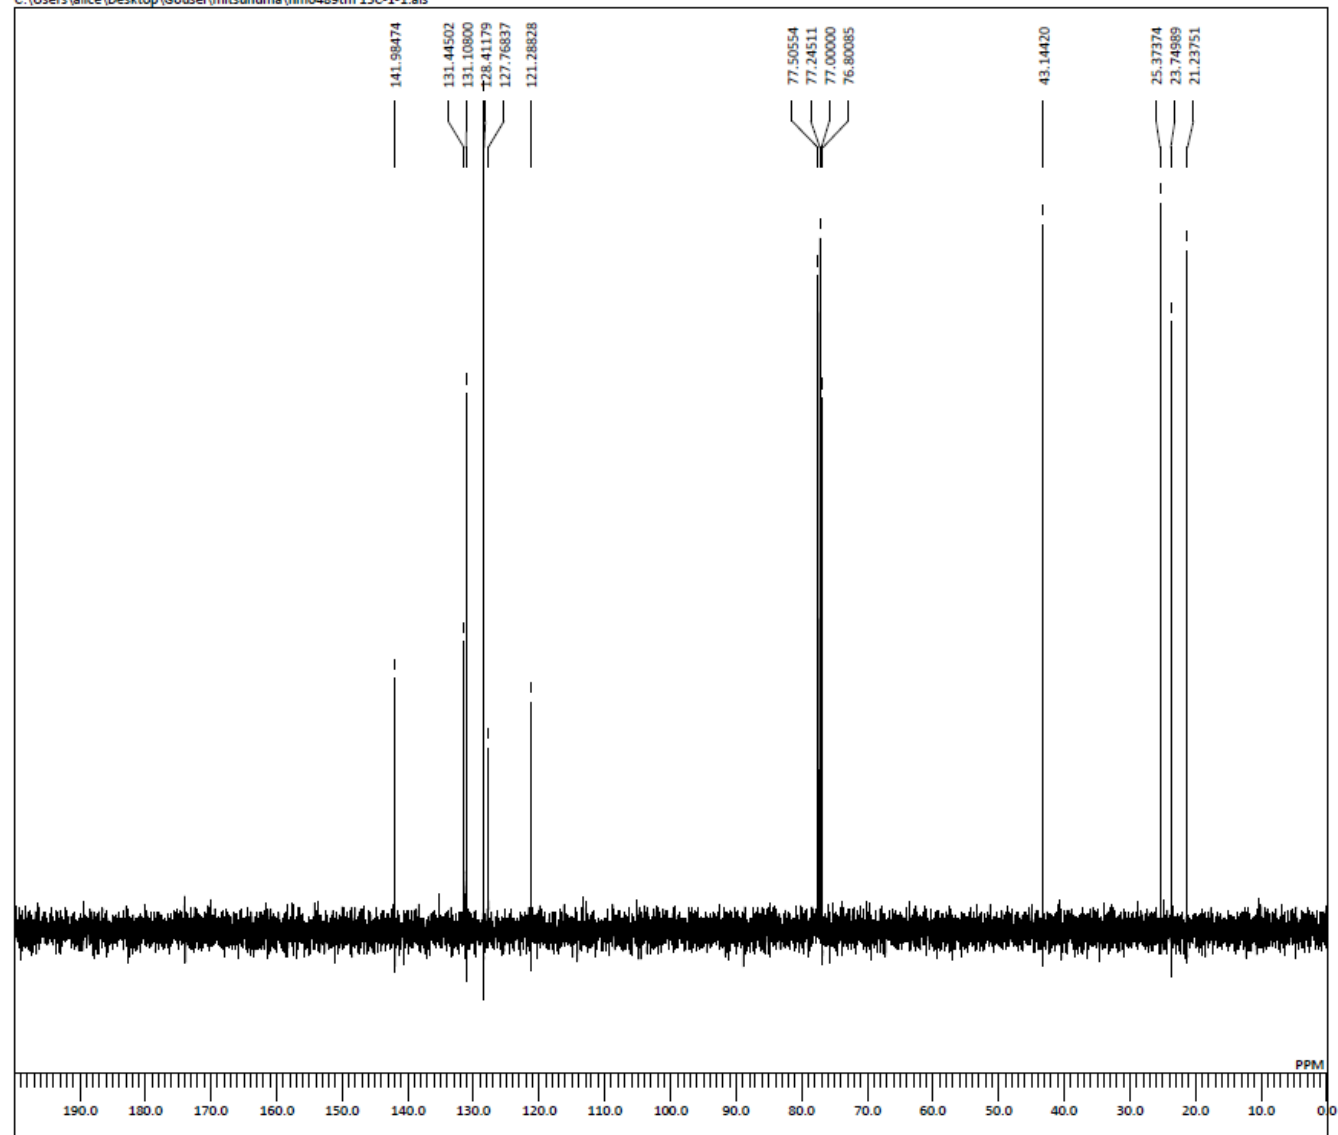

DFILE hm0489tm 13C-1-1.als  
 COMMT  
 DATIM 2018-09-17 17:15:15  
 OBNUC 13C  
 EXMOD carbon.jpg  
 OBFREQ 125.77 MHz  
 OBSET 1.58 kHz  
 OBFIN 5.95 Hz  
 POINT 26214  
 FREQU 50505.05 Hz  
 SCANS 20  
 ACQTM 0.5190 sec  
 PD 2.0000 sec  
 PW1 3.40 usec  
 IRNUC 1H  
 CTEMP 21.8 c  
 SLVNT CDCL3  
 EXREF 77.00 ppm  
 BF 0.12 Hz  
 RGAIN 58

C:\Users\alice\Desktop\Gousei\mitsunuma\hm0490tm2-1-1.als

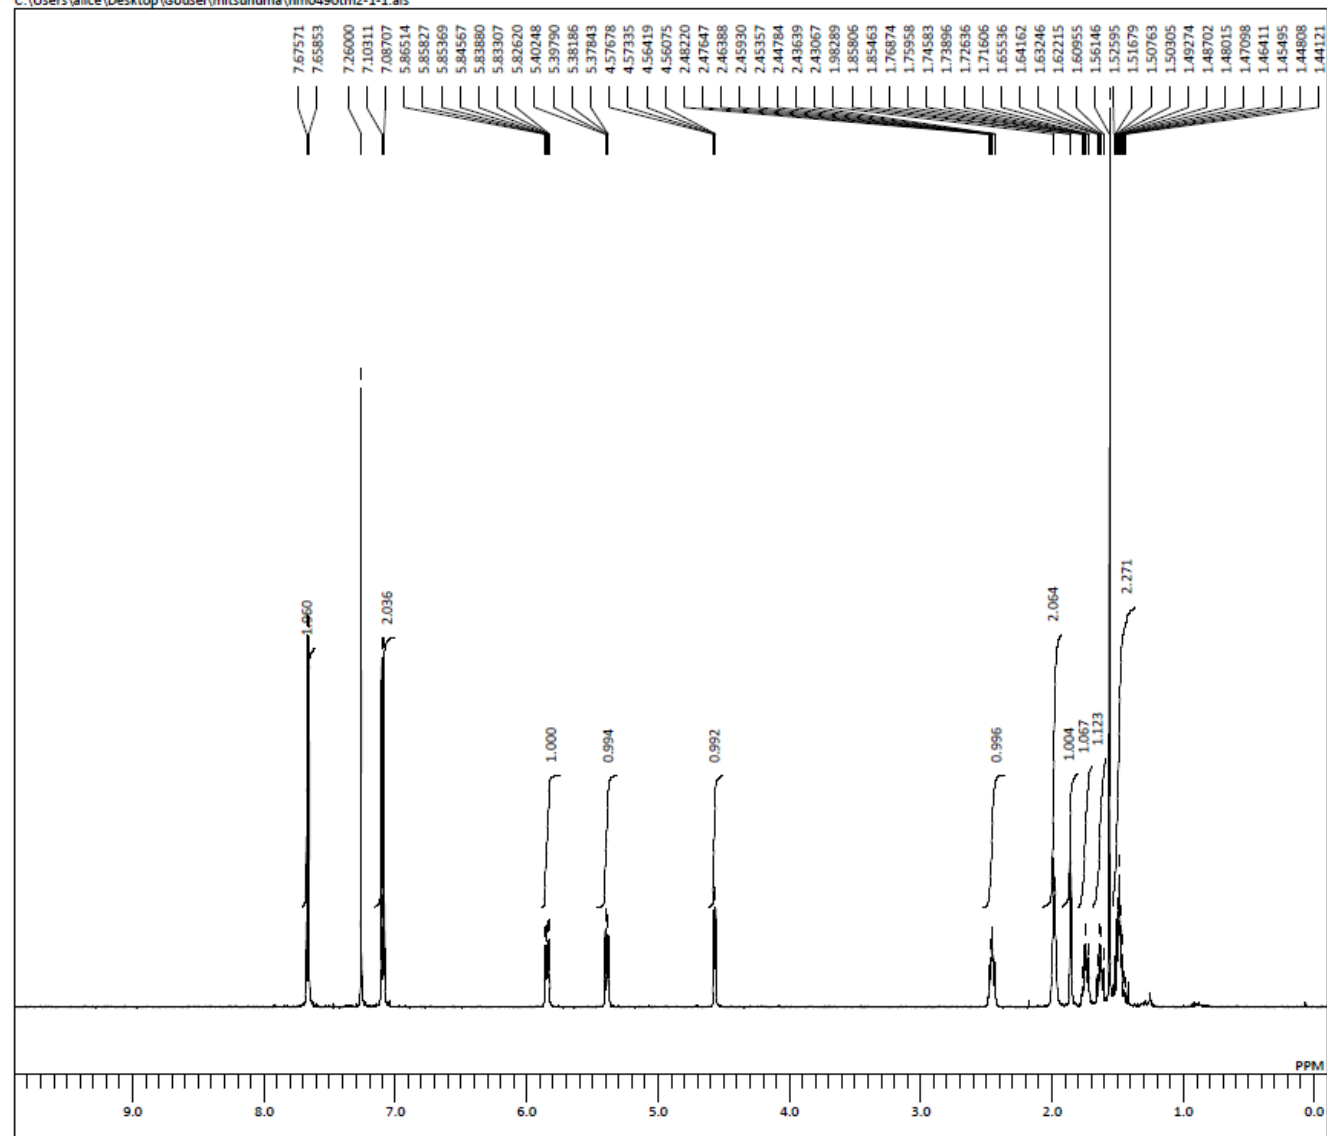

DFILE hm0490tm2-1-1.als  
 COMMT  
 DATIM 2018-09-17 18:31:03  
 OBNUC 1H  
 EXMOD proton.jpg  
 OBFREQ 500.16 MHz  
 OBSET 2.41 KHz  
 OBFIN 6.01 Hz  
 POINT 13107  
 FREQU 7507.51 Hz  
 SCANS 8  
 ACQTM 1.7459 sec  
 PD 5.0000 sec  
 PW1 5.55 usec  
 IRNUC 1H  
 CTEMP 21.9 c  
 SLVNT CDCL3  
 EXREF 7.26 ppm  
 BF 0.12 Hz  
 RGAIN 34

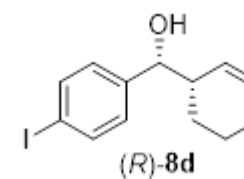

C:\Users\alice\Desktop\Gousei\mitsunuma\hm0490tm 13C-1-1.als

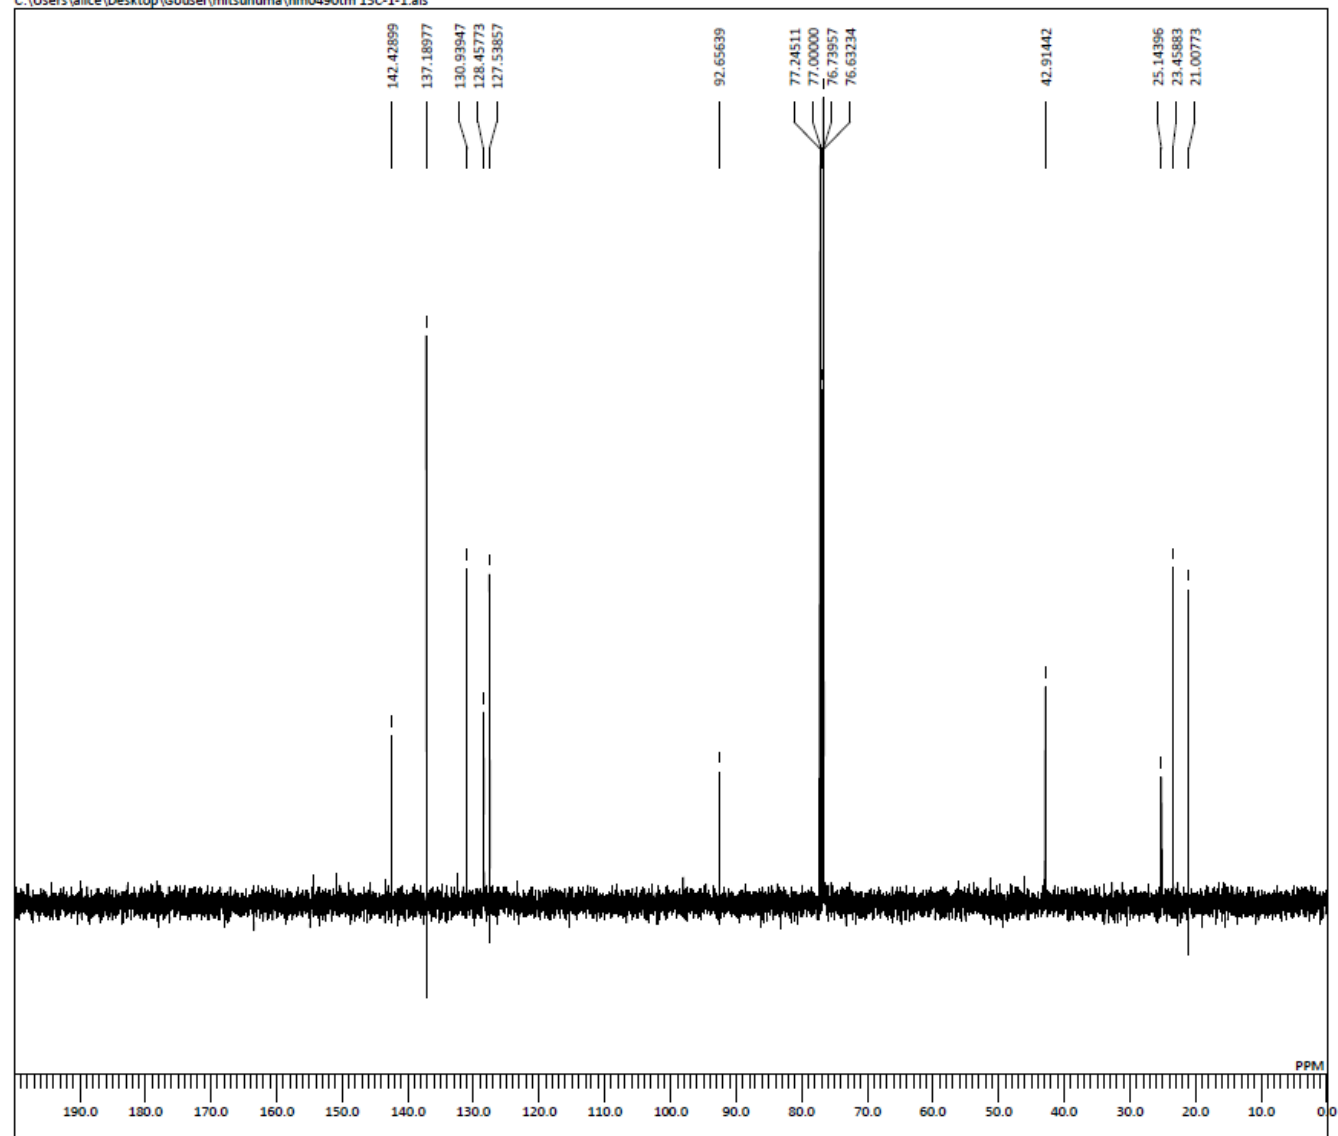

DFILE hm0490tm 13C-1-1.als  
 COMMT  
 DATIM 2018-09-17 19:02:45  
 OBNUC 13C  
 EXMOD carbon.jpg  
 OBFREQ 125.77 MHz  
 OBSET 1.58 kHz  
 OBFIN 5.95 Hz  
 POINT 26214  
 FREQU 50505.05 Hz  
 SCANS 60  
 ACQTM 0.5190 sec  
 PD 2.0000 sec  
 PW1 3.40 usec  
 IRNUC 1H  
 CTEMP 21.8 c  
 SLVNT CDCL3  
 EXREF 77.00 ppm  
 BF 0.12 Hz  
 RGAIN 58

C:\Users\alice\Desktop\Gousei\mitsunuma\hm0525tm-1-1.als

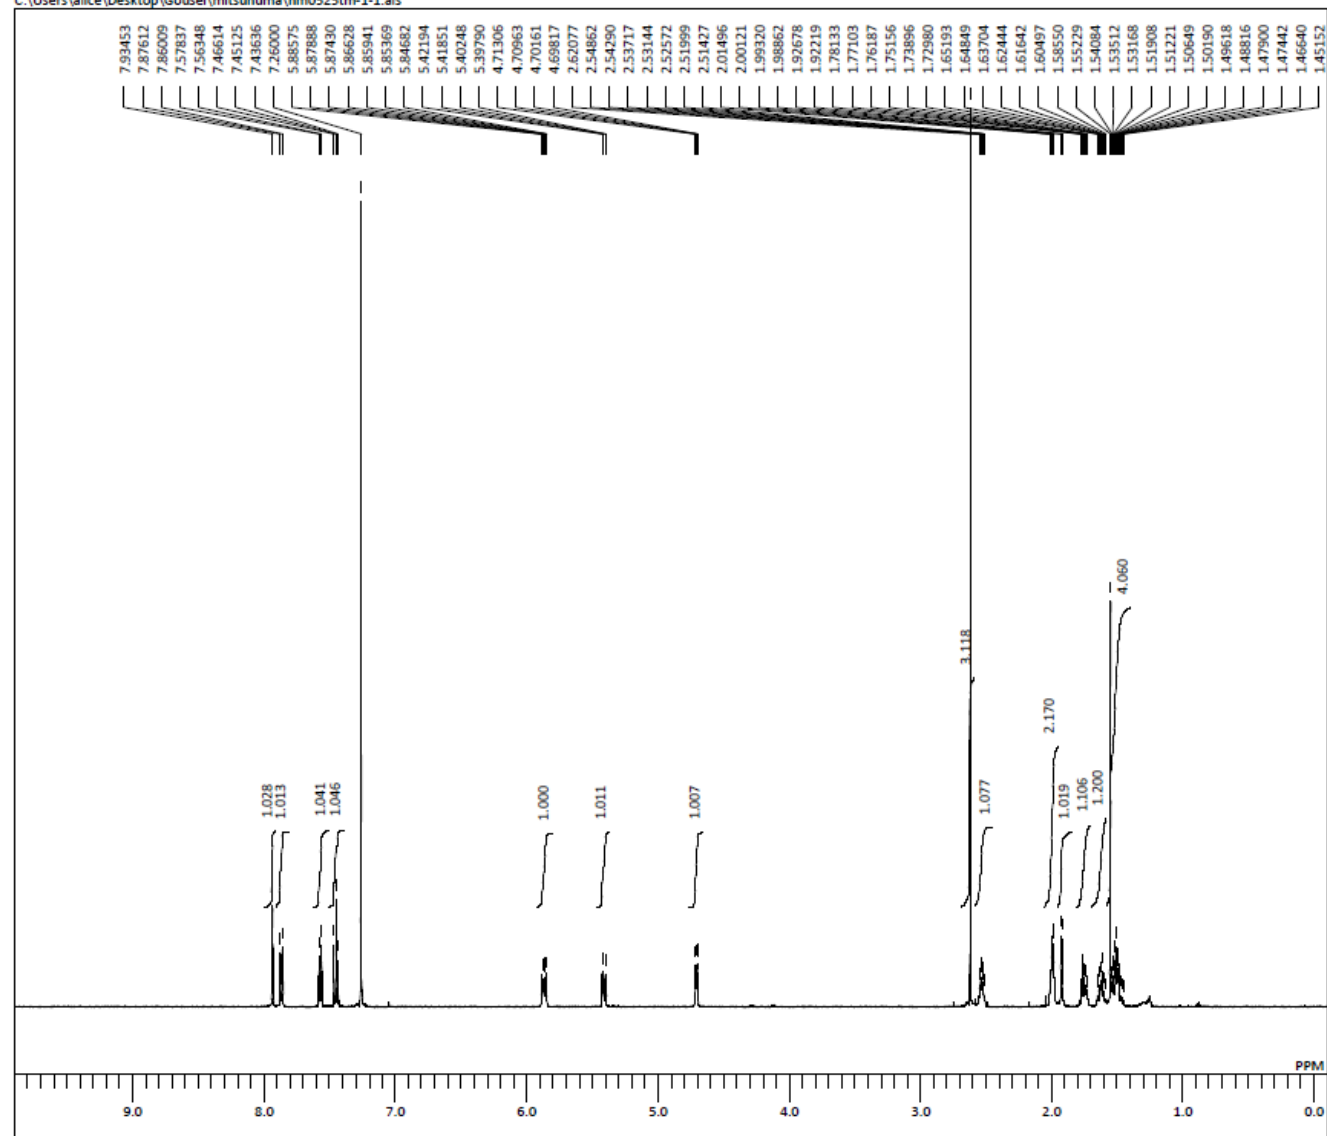

DFILE hm0525tm-1-1.als  
 COMMT  
 DATIM 2018-09-20 19:57:29  
 OBNUC 1H  
 EXMOD proton.jpg  
 OBFREQ 500.16 MHz  
 OBSET 2.41 KHz  
 OBFIN 6.01 Hz  
 POINT 13107  
 FREQU 7507.51 Hz  
 SCANS 8  
 ACQTM 1.7459 sec  
 PD 5.0000 sec  
 PW1 5.55 usec  
 IRNUC 1H  
 CTEMP 21.4 c  
 SLVNT CDCL3  
 EXREF 7.26 ppm  
 BF 0.12 Hz  
 RGAIN 34

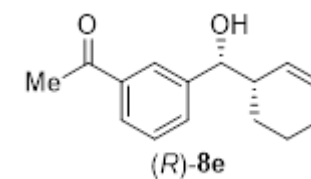

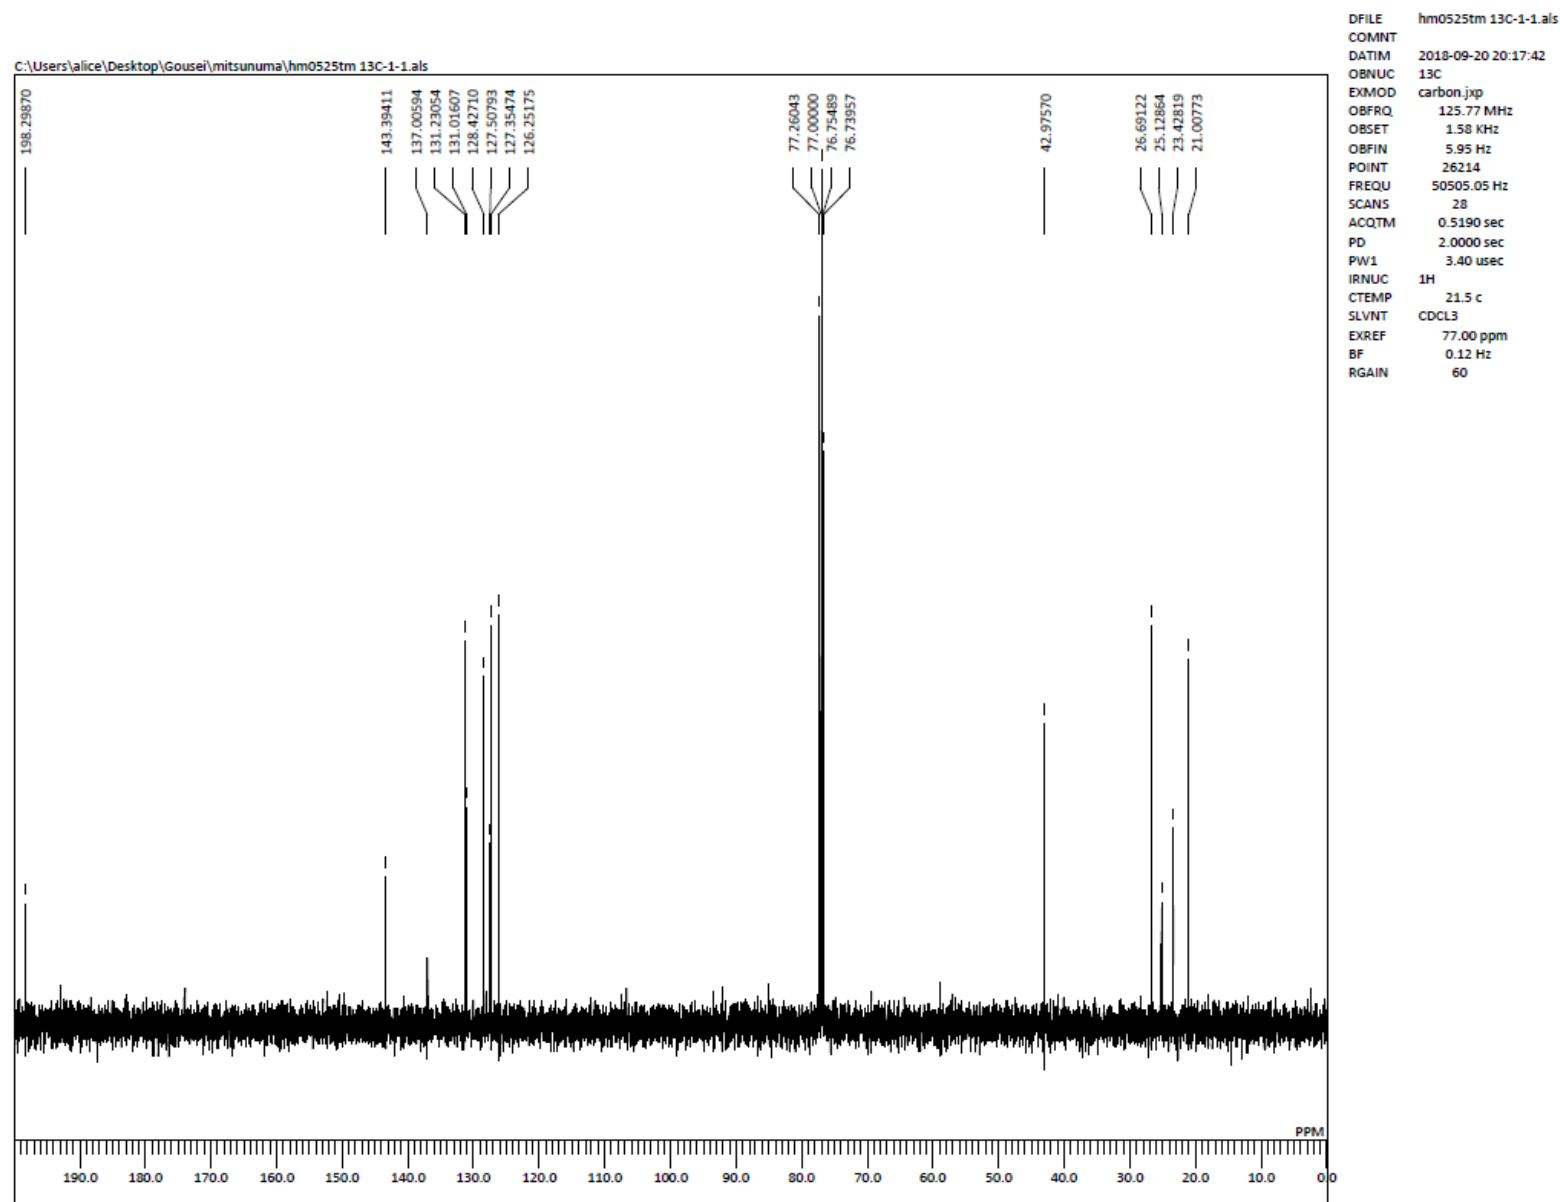

C:\Users\alice\Desktop\Gousei\mitsunuma\hm0510tm2-1-1.als

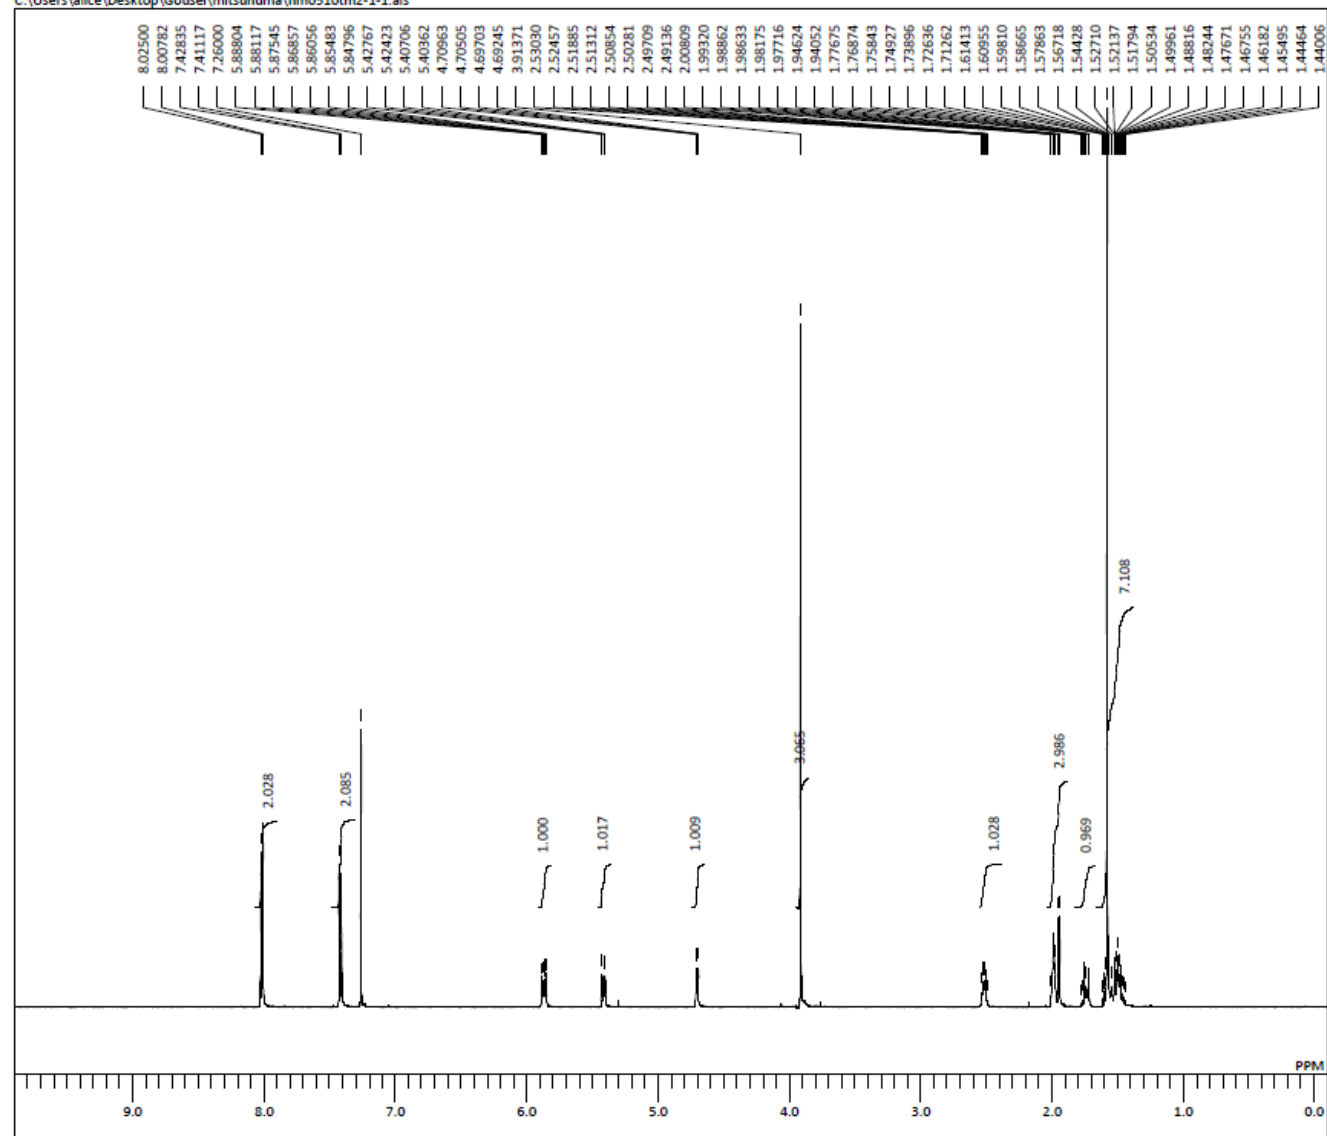

DFILE hm0510tm2-1-1.als  
 COMMT  
 DATIM 2018-09-19 01:32:34  
 OBNUC 1H  
 EXMOD proton.jpg  
 OBFREQ 500.16 MHz  
 OBSET 2.41 KHz  
 OBFIN 6.01 Hz  
 POINT 13107  
 FREQU 7507.51 Hz  
 SCANS 8  
 ACQTM 1.7459 sec  
 PD 5.0000 sec  
 PW1 5.55 usec  
 IRNUC 1H  
 CTEMP 21.9 c  
 SLVNT CDCL3  
 EXREF 7.26 ppm  
 BF 0.12 Hz  
 RGAIN 32

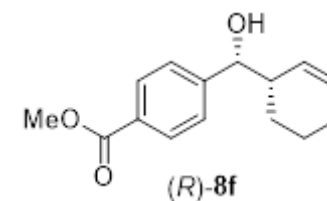

C:\Users\alice\Desktop\Gousei\mitsunuma\hm0510tm2 13C-1-1.als

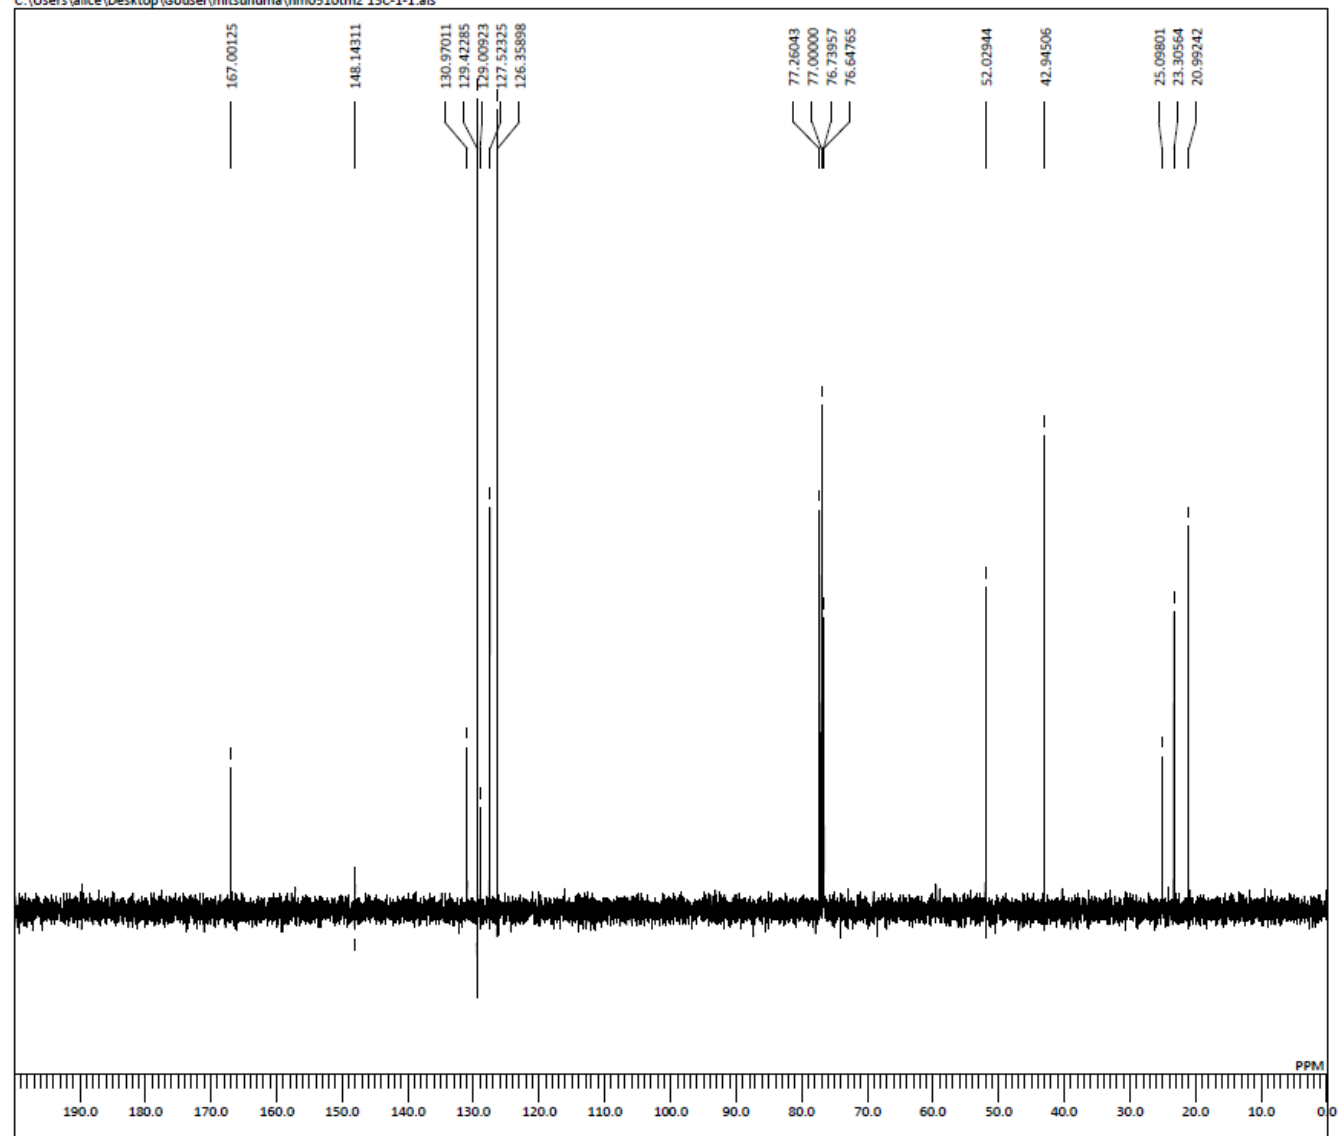

DFILE hm0510tm2 13C-1-1.als  
 COMMT  
 DATIM 2018-09-19 01:48:45  
 OBNUC 13C  
 EXMOD carbon.jpg  
 OBFREQ 125.77 MHz  
 OBSET 1.58 kHz  
 OBFIN 5.95 Hz  
 POINT 26214  
 FREQU 50505.05 Hz  
 SCANS 20  
 ACQTM 0.5190 sec  
 PD 2.0000 sec  
 PW1 3.40 usec  
 IRNUC 1H  
 CTEMP 21.8 c  
 SLVNT CDCL3  
 EXREF 77.00 ppm  
 BF 0.12 Hz  
 RGAIN 58

C:\Users\alice\Desktop\Gousei\mitsunuma\hm0526tm2-1-1.als

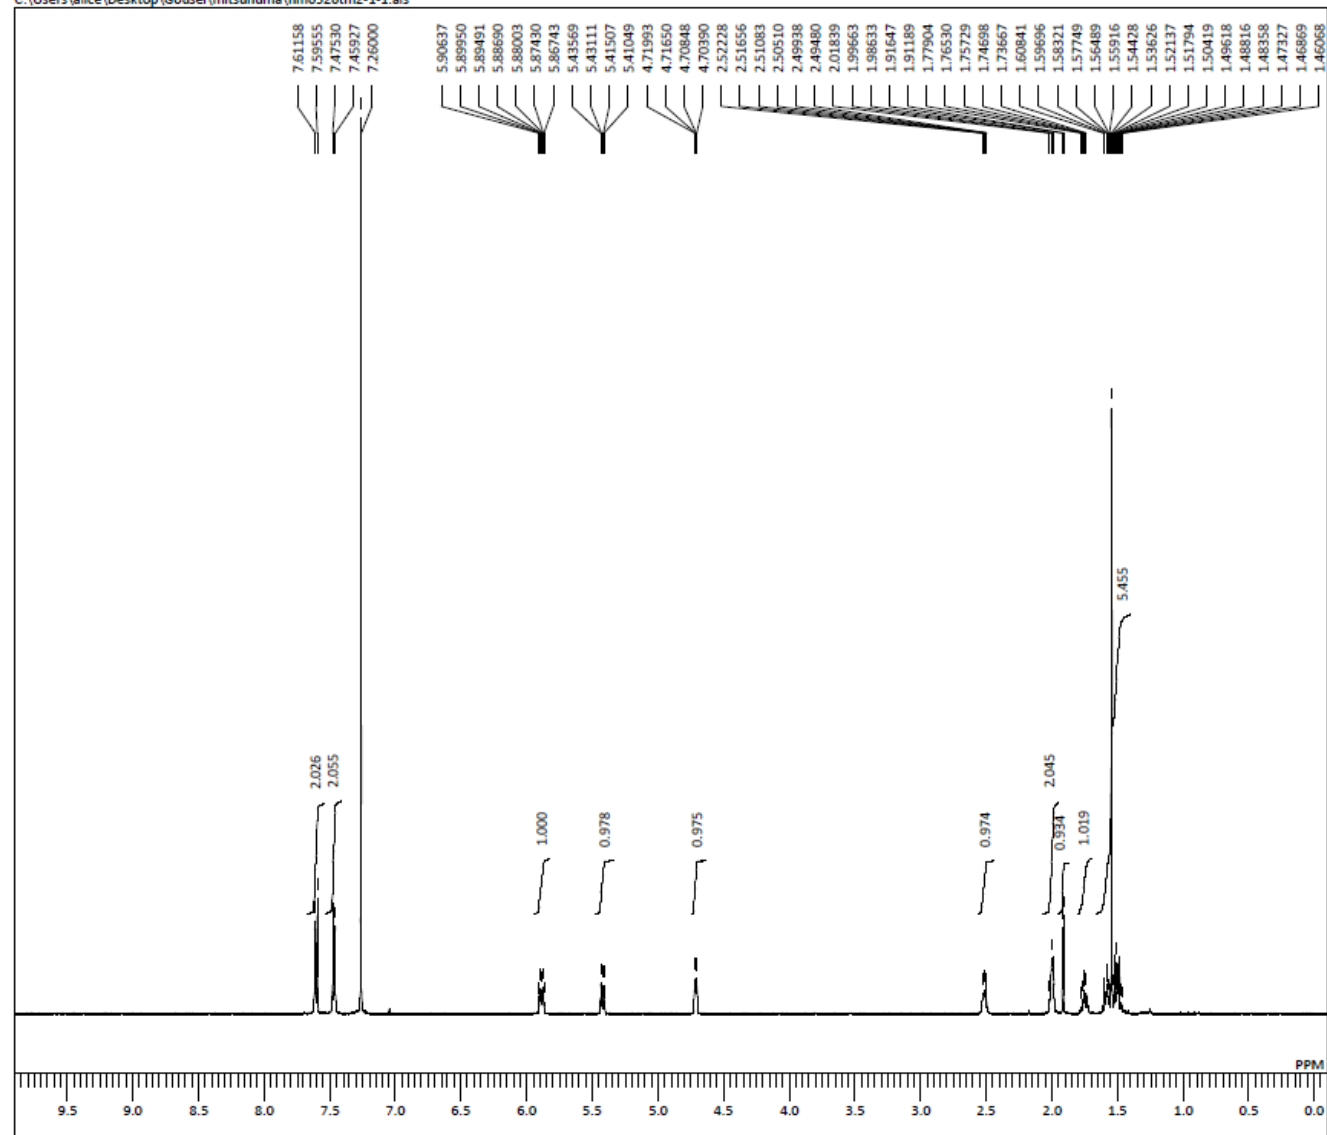

DFILE hm0526tm2-1-1.als  
 COMMT  
 DATIM 2018-09-20 20:01:07  
 OBNUC 1H  
 EXMOD proton.jpg  
 OBFREQ 500.16 MHz  
 OBSET 2.41 KHz  
 OBFIN 6.01 Hz  
 POINT 13107  
 FREQU 7507.51 Hz  
 SCANS 8  
 ACQTM 1.7459 sec  
 PD 5.0000 sec  
 PW1 5.55 usec  
 IRNUC 1H  
 CTEMP 21.4 c  
 SLVNT CDCL3  
 EXREF 7.26 ppm  
 BF 0.12 Hz  
 RGAIN 34

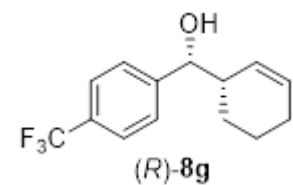

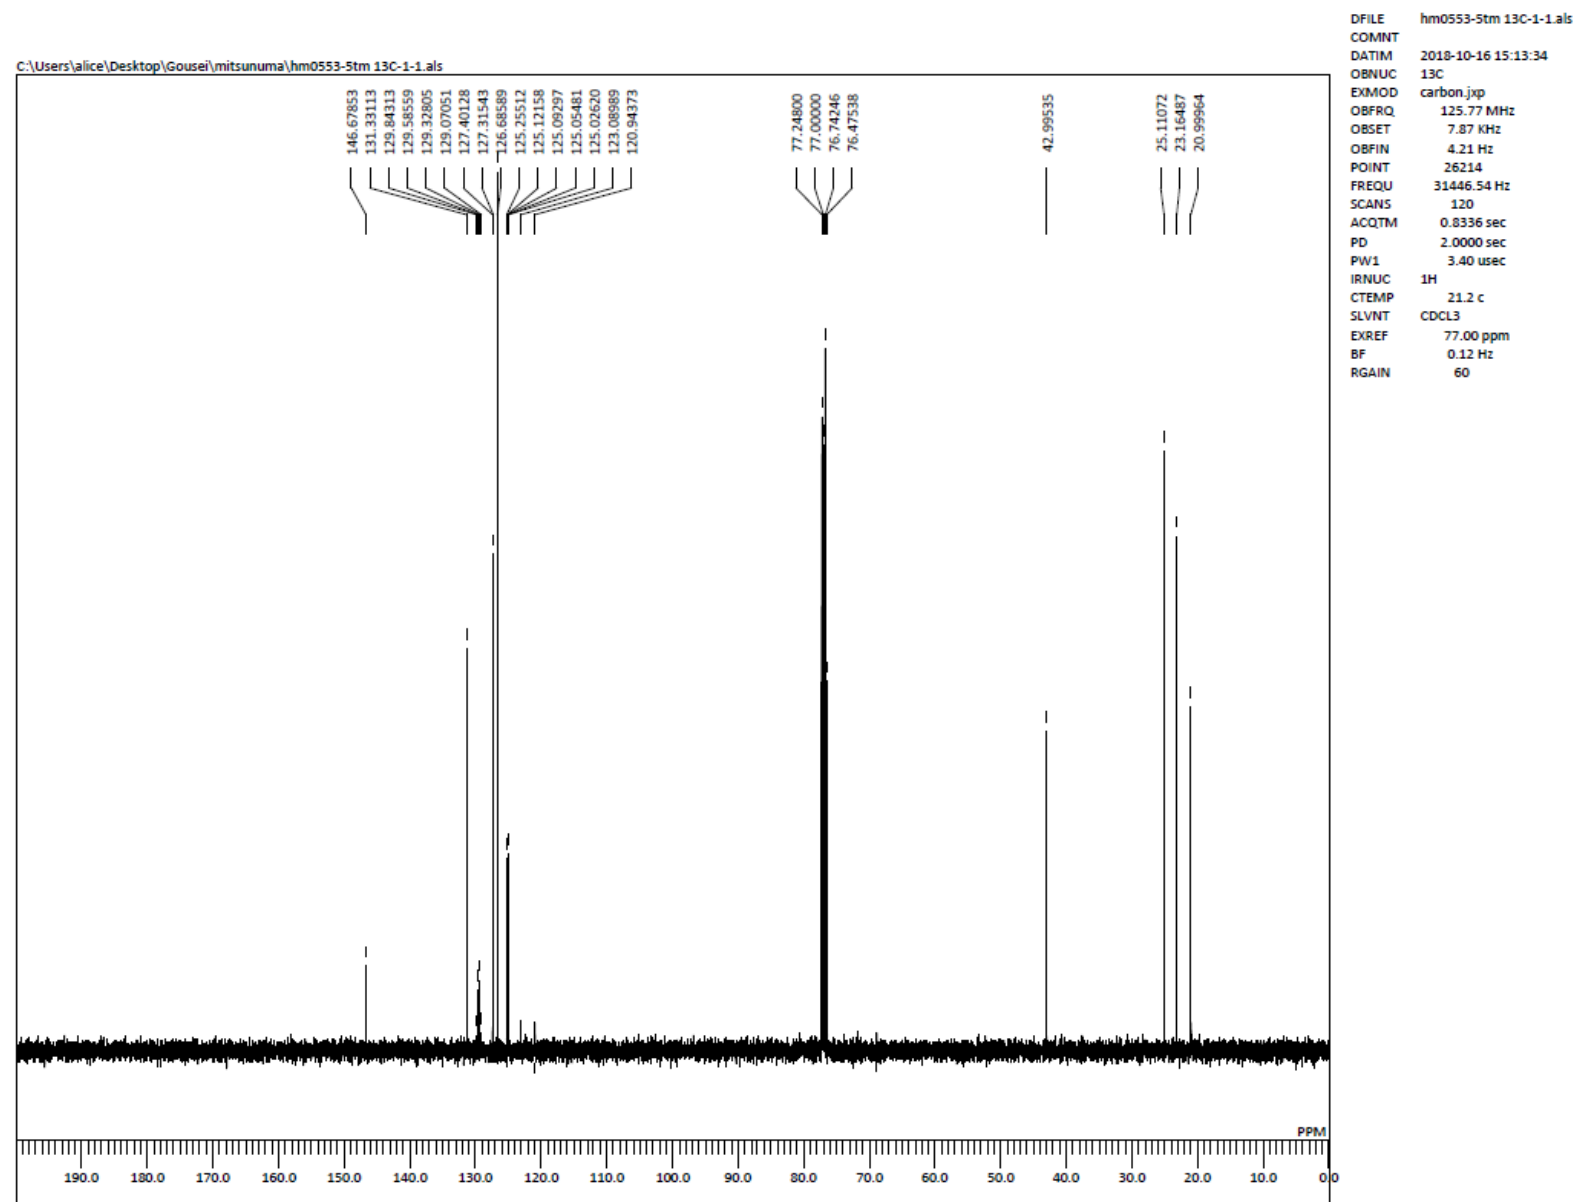

H:\NMR\Mitsunuma\Allylation\ECS400data\fuse180921794spectra1H-1-1.als

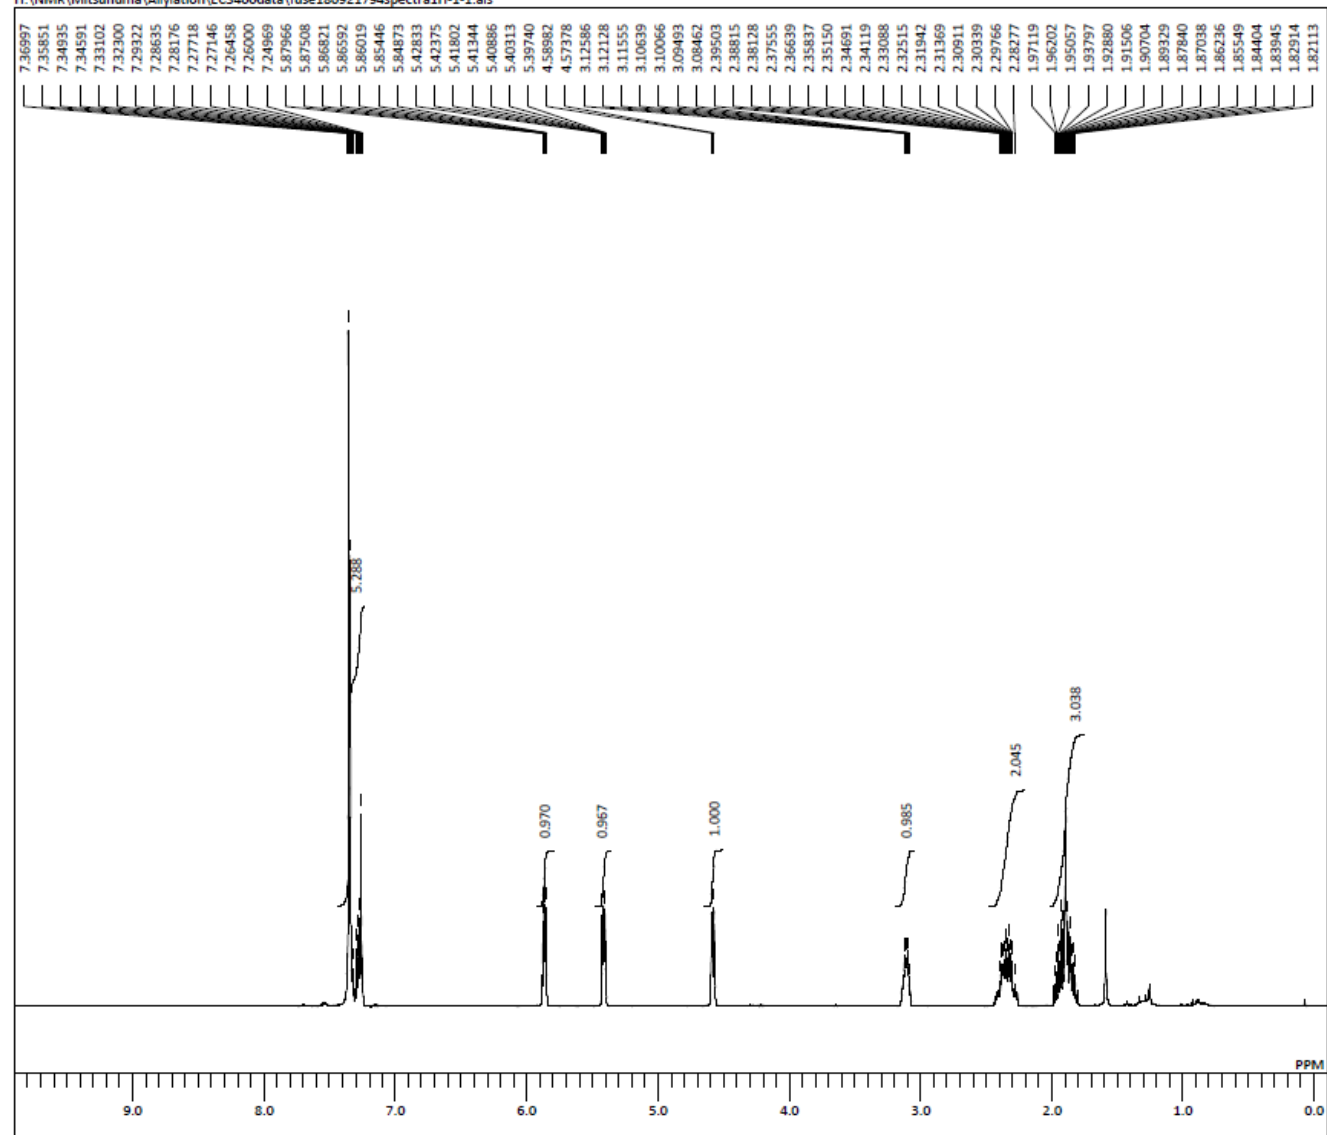

DFILE fuse180921794spectra1H-1-1.als  
 COMMT  
 DATIM 21-09-2018 14:47:35  
 OBNUC 1H  
 EXMOD proton.jpg  
 OBFREQ 391.78 MHz  
 OBSET 8.51 KHz  
 OBFIN 3.34 Hz  
 POINT 13107  
 FREQU 5882.35 Hz  
 SCANS 8  
 ACQTM 2.2282 sec  
 PD 5.0000 sec  
 PW1 5.22 usec  
 IRNUC 1H  
 CTEMP 20.1 c  
 SLVNT CDCL3  
 EXREF 7.26 ppm  
 BF 0.12 Hz  
 RGAIN 36

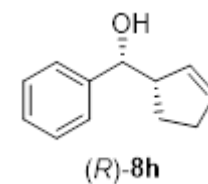

H:\NMR\Mitsunuma\Allylation\ECS400data\fuse180921794spectra13C-1-1.als

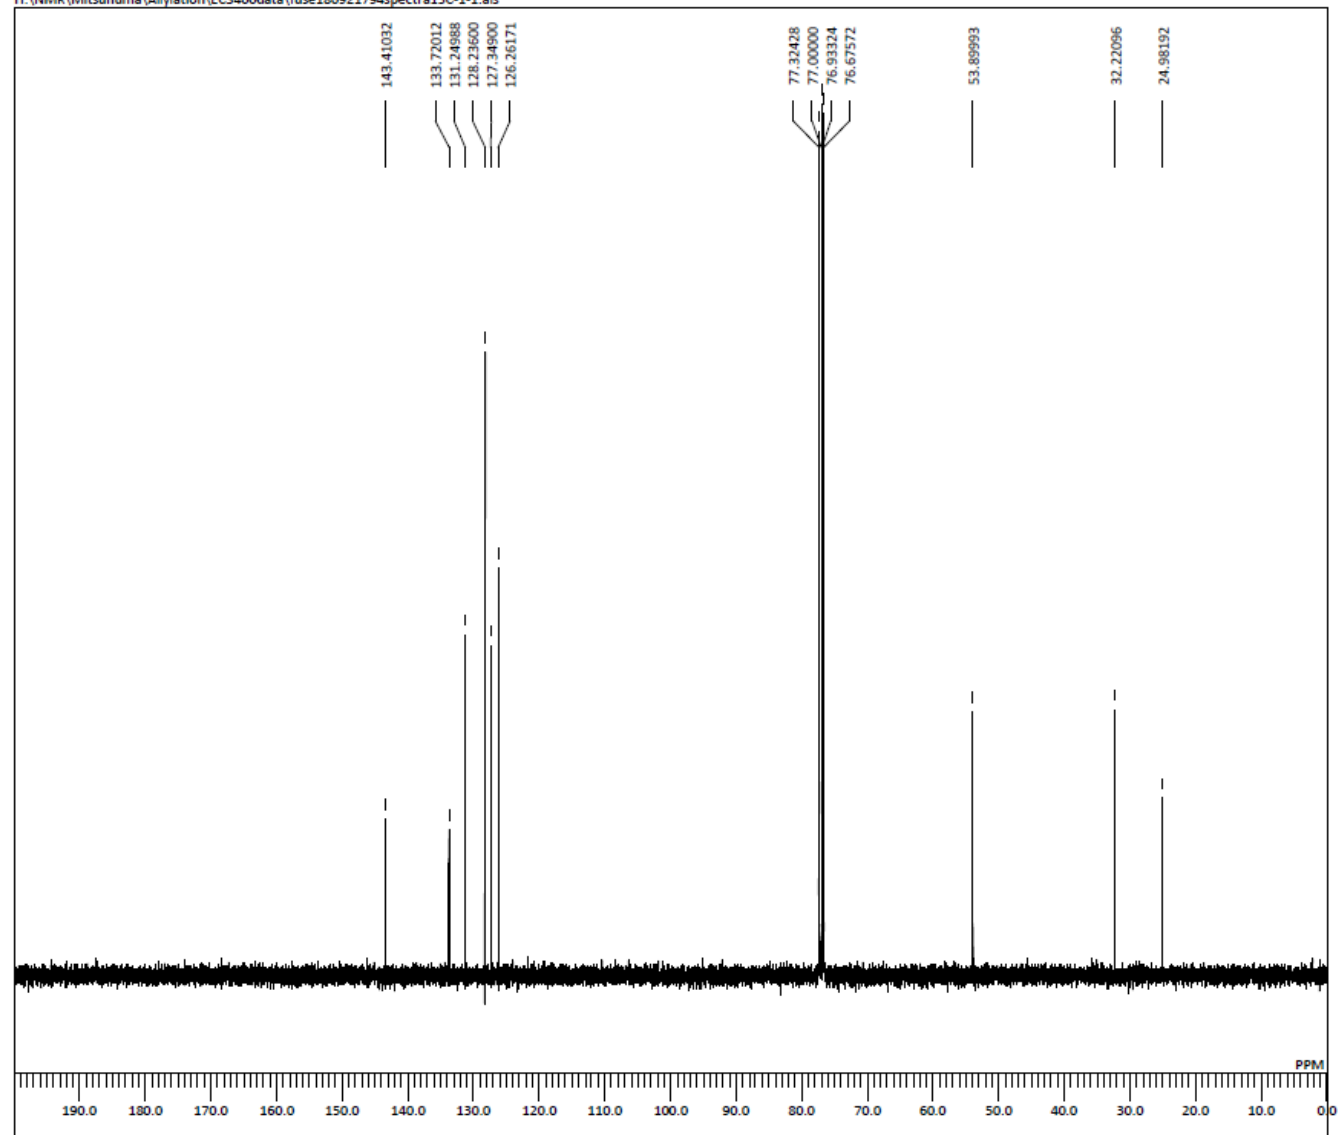

DFILE fuse180921794spectra13C-1-1.als  
 COMMT  
 DATIM 21-09-2018 14:49:32  
 OBNUC 13C  
 EXMOD carbon.jpg  
 OBFREQ 98.52 MHz  
 OBSET 4.64 KHz  
 OBFIN 8.74 Hz  
 POINT 26214  
 FREQU 24630.54 Hz  
 SCANS 483  
 ACQTM 1.0643 sec  
 PD 2.0000 sec  
 PW1 3.12 usec  
 IRNUC 1H  
 CTEMP 20.5 c  
 SLVNT CDCL3  
 EXREF 77.00 ppm  
 BF 0.12 Hz  
 RGAIN 60

H:\NMR\Mitsunuma\Allylation\ECS400data\fuse181017hm588spectra1H-1-1.als

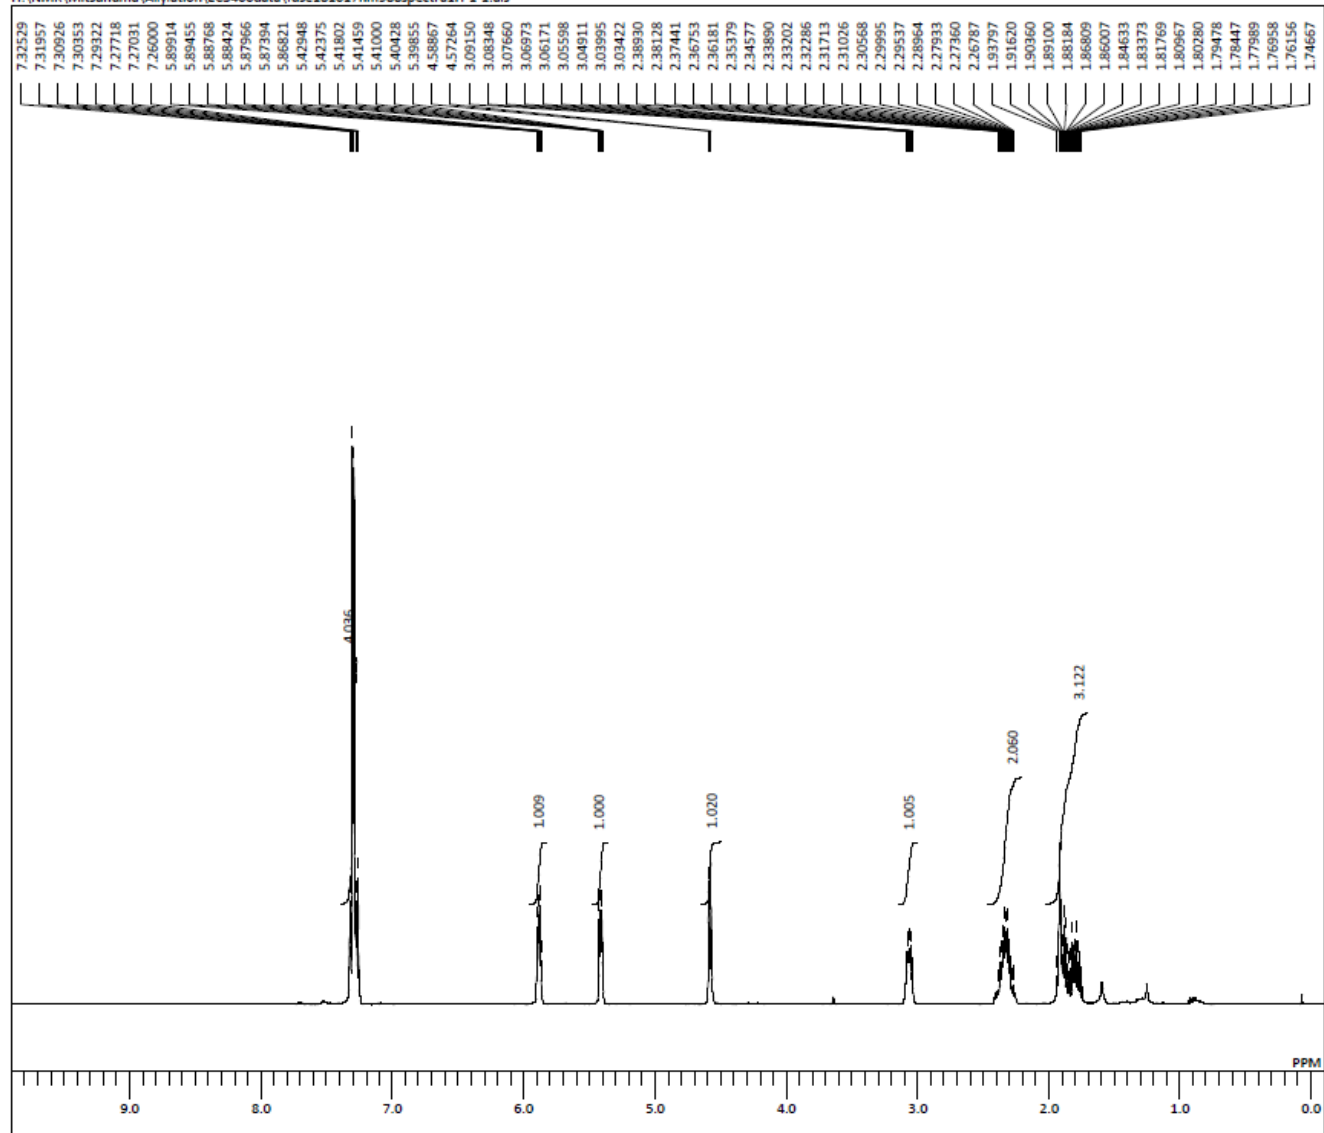

DFILE fuse181017hm588spectra1H-1-1.als  
 COMMT  
 DATIM 17-10-2018 11:57:09  
 OBNUC 1H  
 EXMOD proton.jpg  
 OBFREQ 391.78 MHz  
 OBSET 8.51 KHz  
 OBFIN 3.34 Hz  
 POINT 13107  
 FREQU 5882.35 Hz  
 SCANS 8  
 ACQTM 2.2282 sec  
 PD 8.0000 sec  
 PW1 5.22 usec  
 IRNUC 1H  
 CTEMP 20.1 c  
 SLVNT CDCL3  
 EXREF 7.26 ppm  
 BF 0.12 Hz  
 RGAIN 36

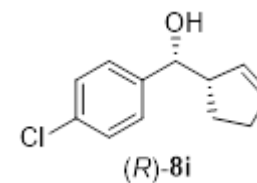

H:\NMR\Mitsunuma\Allylation\ECS400data\fuse181017hm588spectra13C-1-1.als

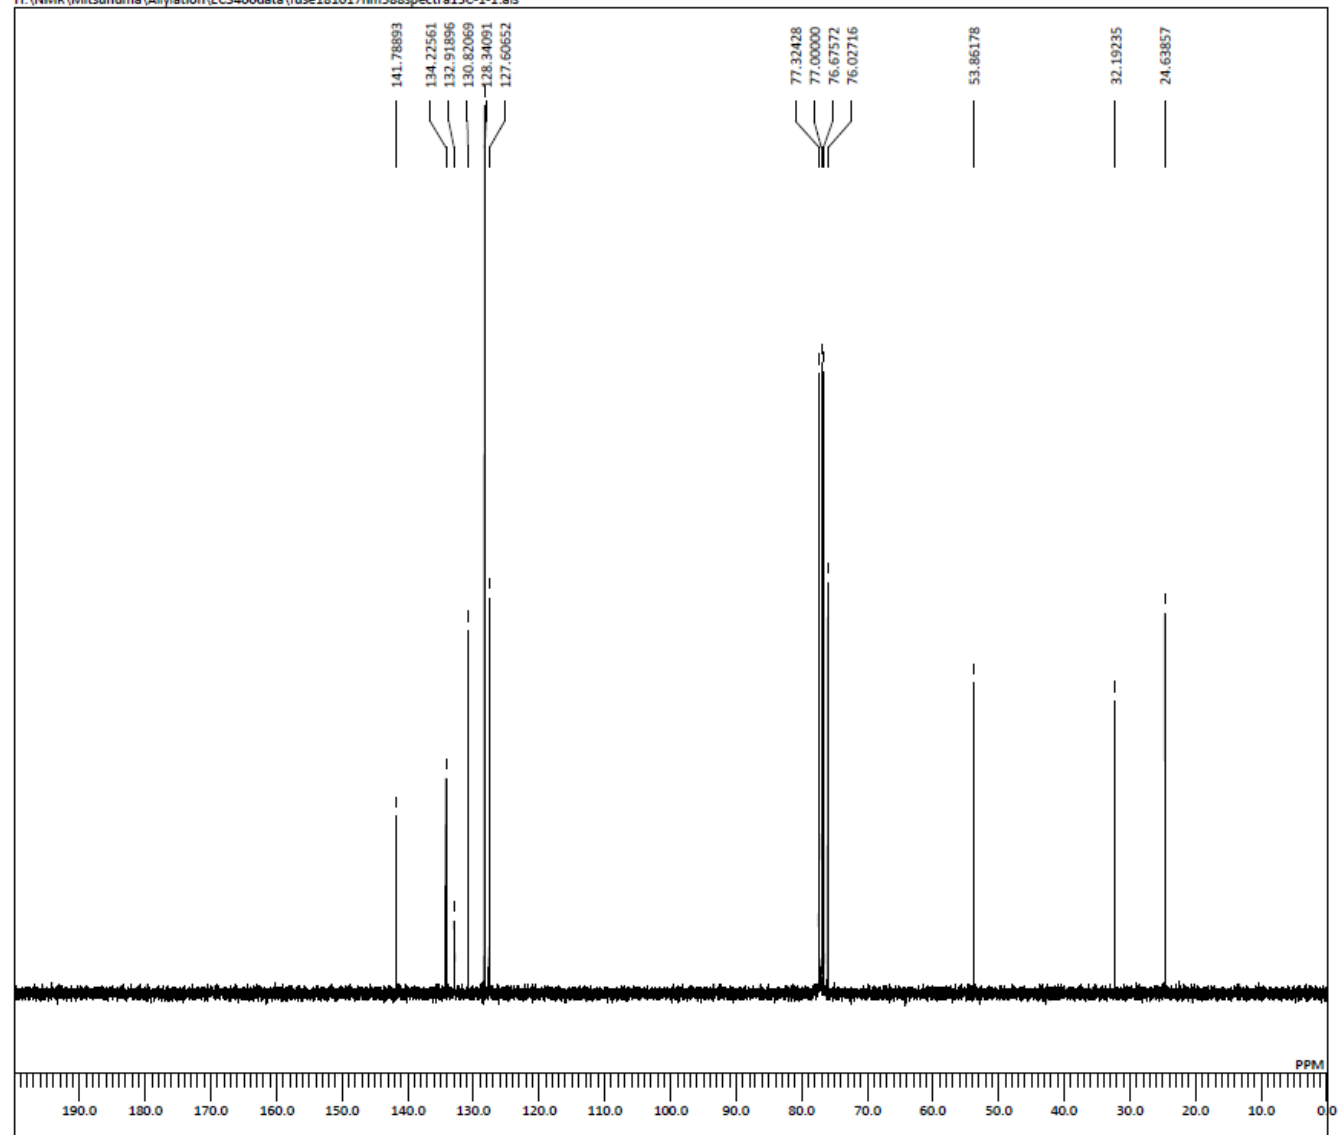

DFILE fuse181017hm588spectra13C-1-1.als  
 COMMT  
 DATIM 17-10-2018 11:59:28  
 OBNUC 13C  
 EXMOD carbon.jpg  
 OBFREQ 98.52 MHz  
 OBSET 4.64 KHz  
 OBFIN 8.74 Hz  
 POINT 26214  
 FREQU 24630.54 Hz  
 SCANS 650  
 ACQTM 1.0643 sec  
 PD 2.0000 sec  
 PW1 3.12 usec  
 IRNUC 1H  
 CTEMP 20.3 c  
 SLVNT CDCL3  
 EXREF 77.00 ppm  
 BF 0.12 Hz  
 RGAIN 60

H:\NMR\Mitsunuma\Allylation\ECS400data\fuse180922798spectra1H-1-1.als

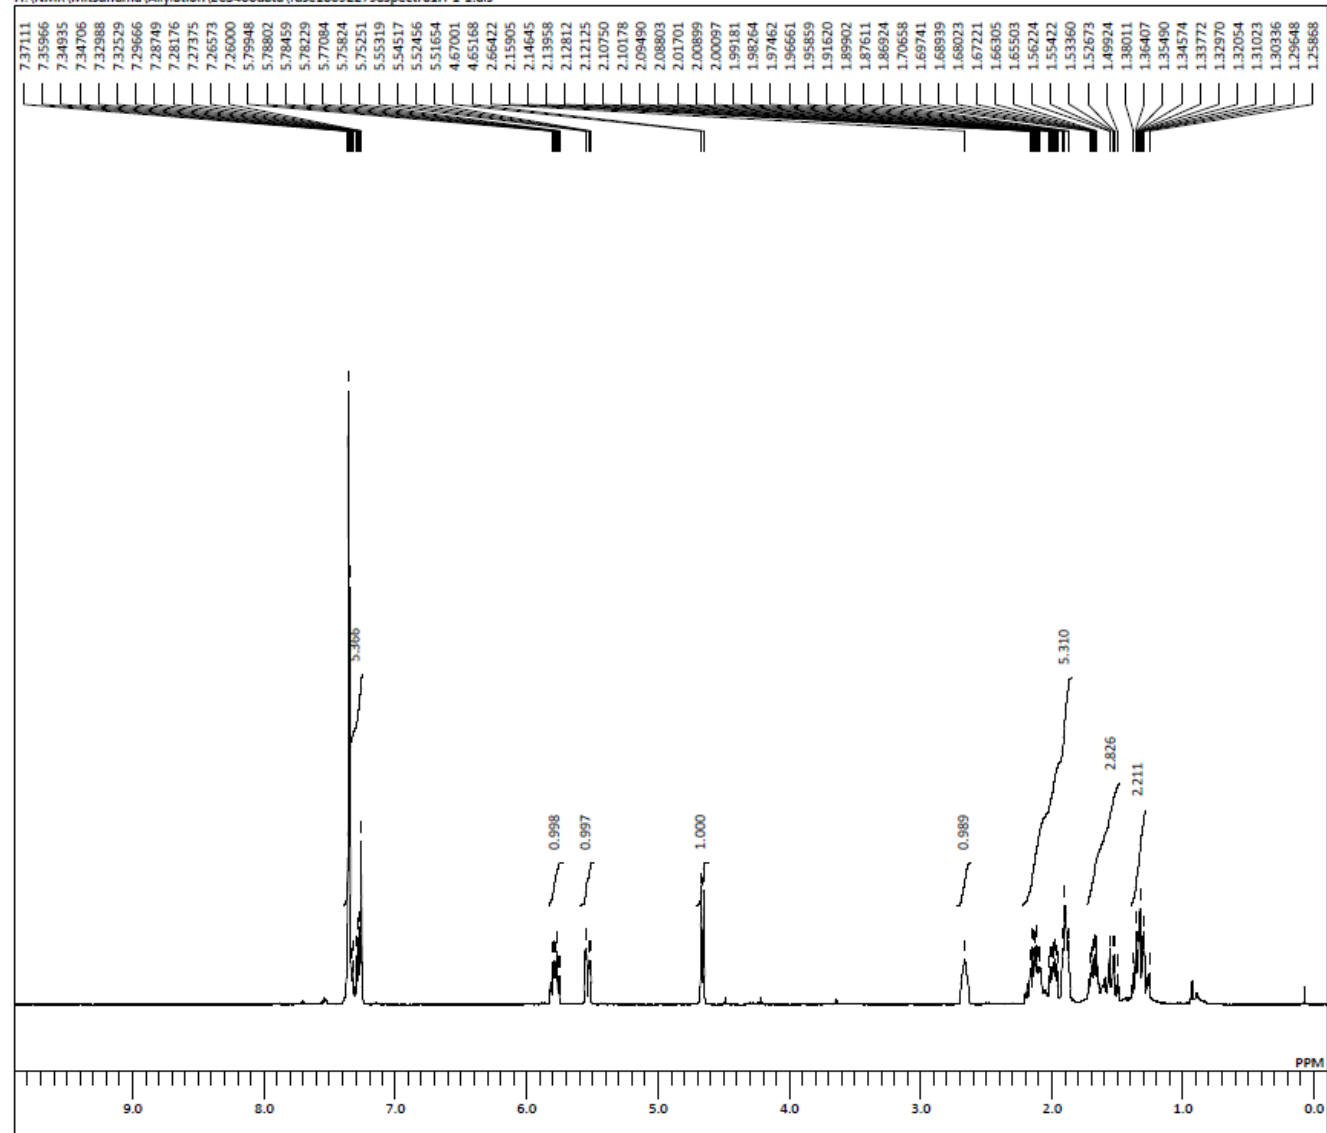

DFILE fuse180922798spectra1H-1-1.als  
COMMT  
DATIM 22-09-2018 14:07:43  
OBNUC 1H  
EXMOD proton.jpg  
OBFRQ 391.78 MHz  
OBSET 8.51 KHz  
OBFIN 3.34 Hz  
POINT 13107  
FREQU 5882.35 Hz  
SCANS 8  
ACQTM 2.2282 sec  
PD 5.0000 sec  
PW1 5.22 usec  
IRNUC 1H  
CTEMP 20.1 c  
SLVNT CDCL3  
EXREF 7.26 ppm  
BF 0.12 Hz  
RGAIN 30

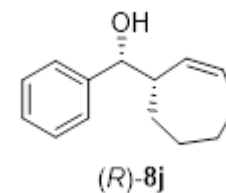

H:\NMR\Mitsunuma\Allylation\ECS400data\fuse180922798spectra13C-1-1.als

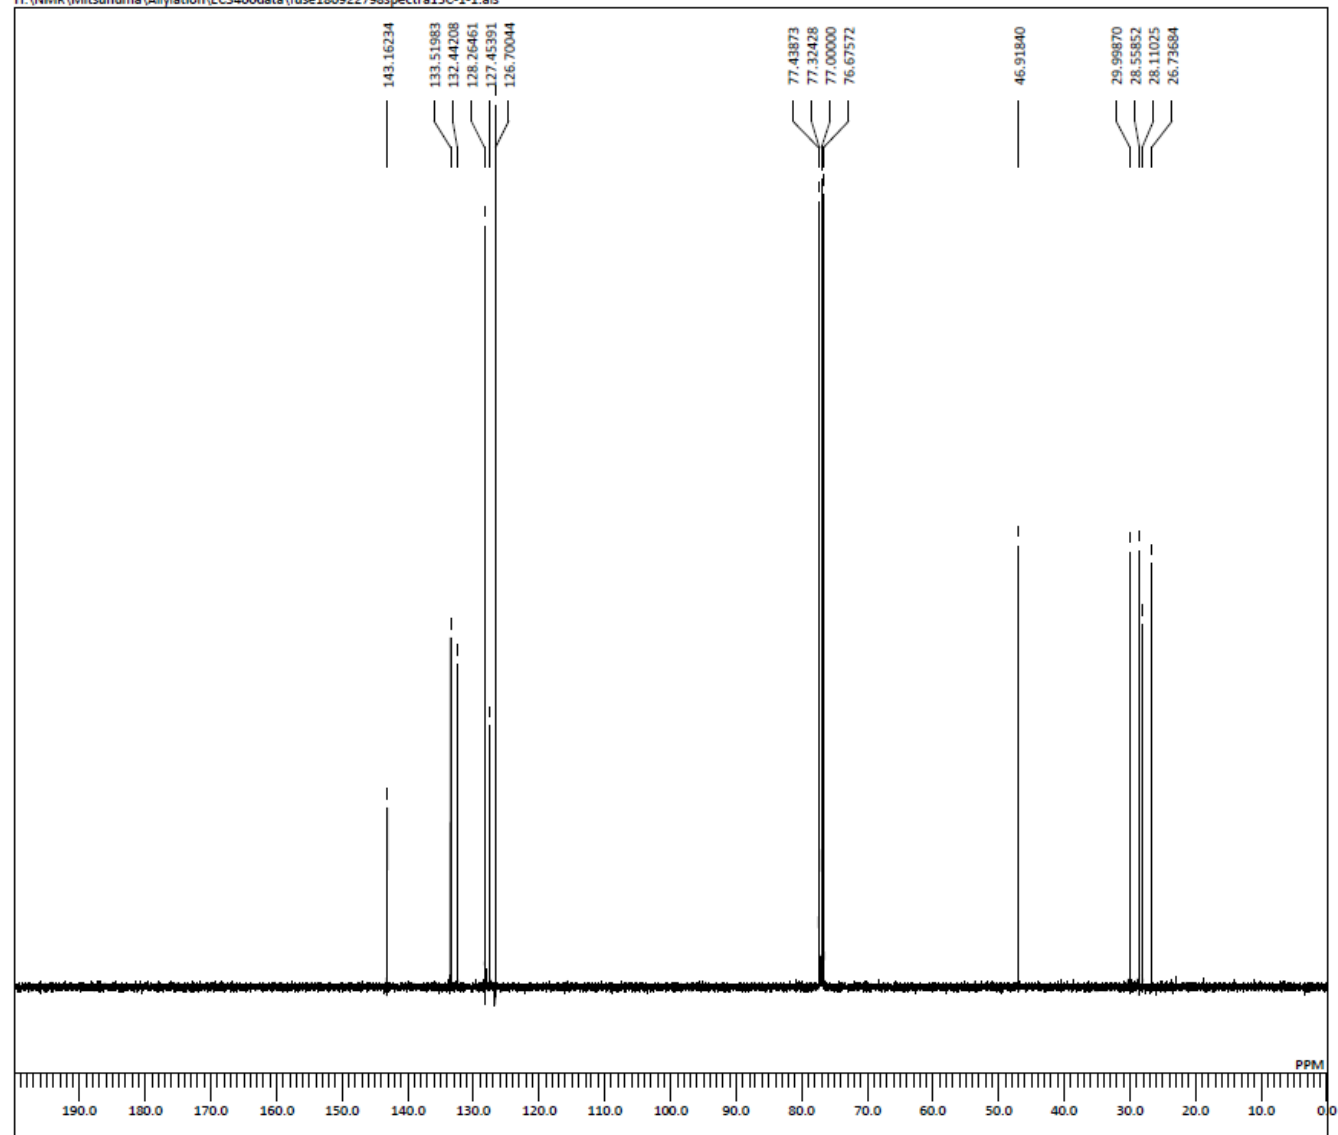

DFILE fuse180922798spectra13C-1-1.als  
COMMT  
DATIM 22-09-2018 14:09:35  
OBNUC 13C  
EXMOD carbon.jpg  
OBFRQ 98.52 MHz  
OBSET 4.64 KHz  
OBFIN 8.74 Hz  
POINT 26214  
FREQU 24630.54 Hz  
SCANS 1774  
ACQTM 1.0643 sec  
PD 2.0000 sec  
PW1 3.12 usec  
IRNUC 1H  
CTEMP 20.3 c  
SLVNT CDCL3  
EXREF 77.00 ppm  
BF 0.12 Hz  
RGAIN 60

C:\Users\alice\Desktop\Gousei\Fuse\Cr\spectra\fuse181016hm509spectra1H-1-1.als

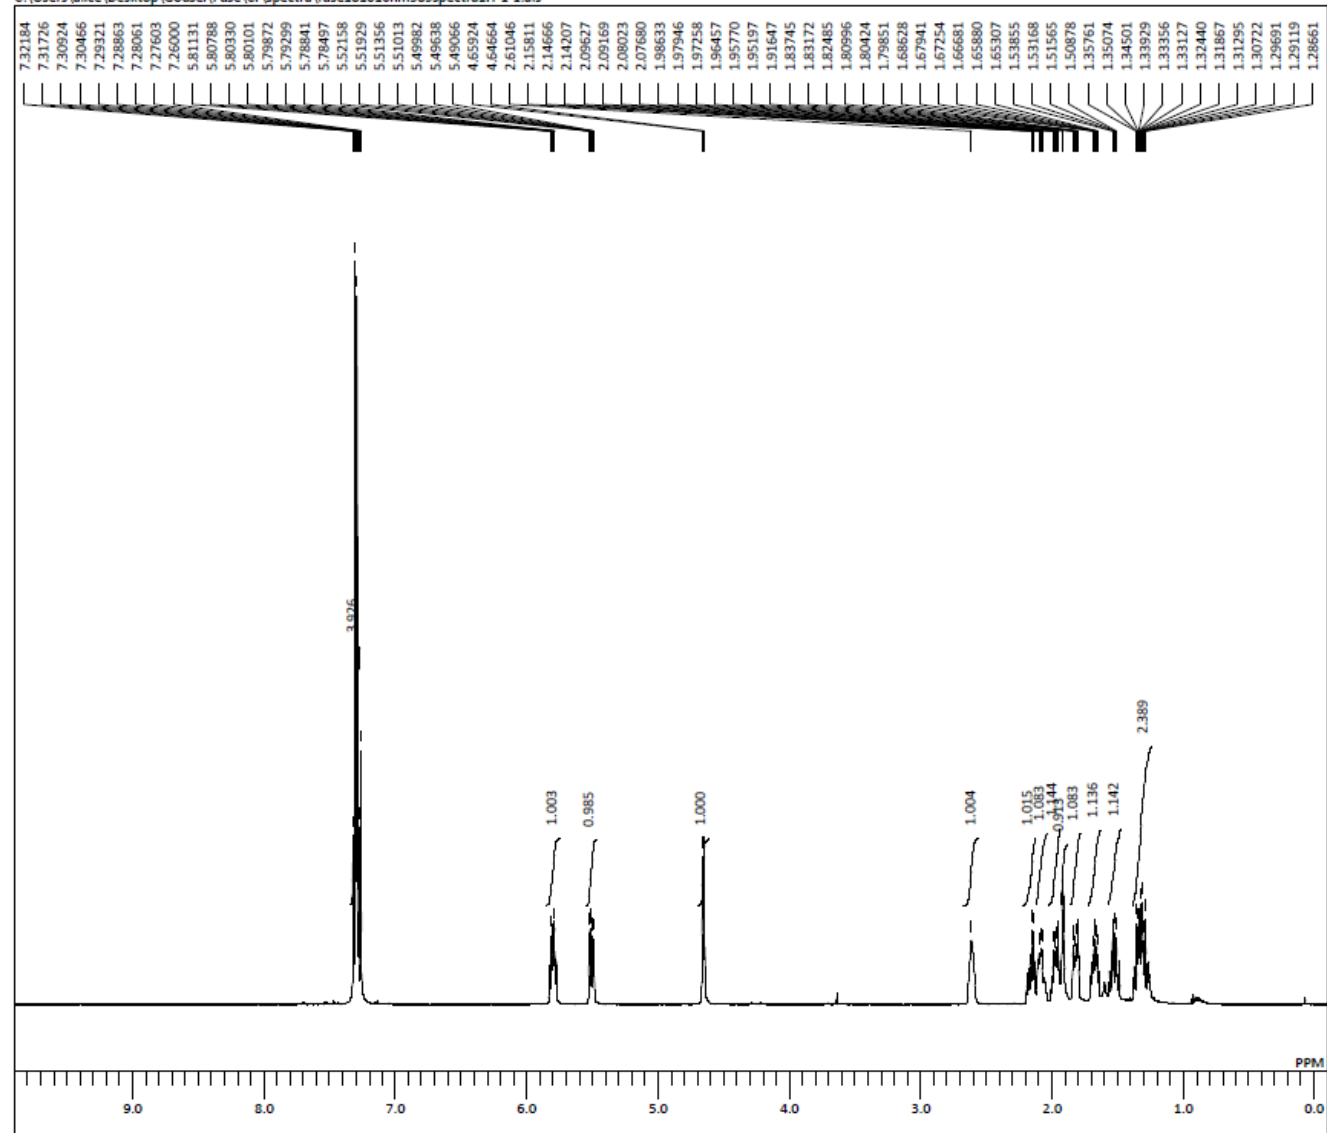

DFILE fuse181016hm509spectra1H-1-1.als  
 COMMT  
 DATIM 2018-10-16 21:52:32  
 OBNUC 1H  
 EXMOD proton.jpg  
 OBFREQ 500.16 MHz  
 OBSET 2.41 KHz  
 OBFIN 6.01 Hz  
 POINT 13107  
 FREQU 7507.51 Hz  
 SCANS 8  
 ACQTM 1.7459 sec  
 PD 5.0000 sec  
 PW1 5.55 usec  
 IRNUC 1H  
 CTEMP 21.8 c  
 SLVNT CDCL3  
 EXREF 7.26 ppm  
 BF 0.12 Hz  
 RGAIN 30

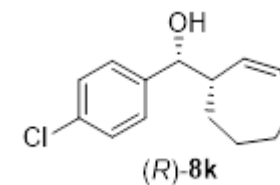

C:\Users\alice\Desktop\Gousei\Fuse\Cr\spectra\fuse181016hm589spectra13C-1-1.als

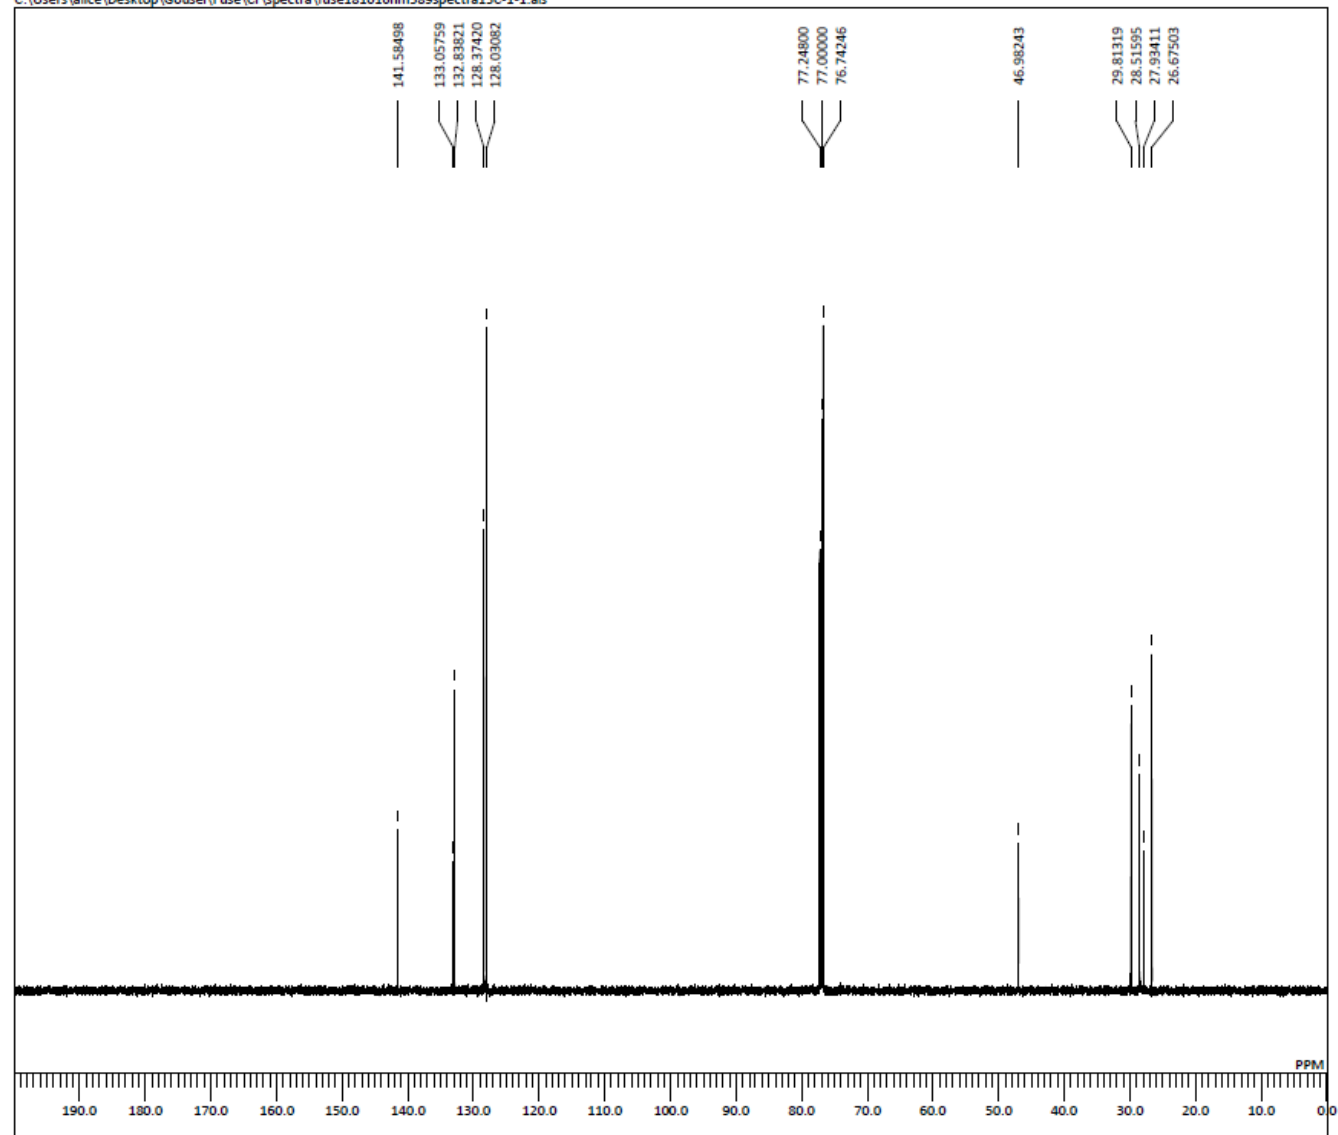

DFILE fuse181016hm589spectra13C-1-1.als  
COMMT  
DATIM 2018-10-16 21:54:07  
OBNUC 13C  
EXMOD carbon.jpg  
OBFREQ 125.77 MHz  
OBSET 7.87 KHz  
OBFIN 4.21 Hz  
POINT 26214  
FREQU 31446.54 Hz  
SCANS 697  
ACQTM 0.8336 sec  
PD 2.0000 sec  
PW1 3.40 usec  
IRNUC 1H  
CTEMP 22.2 c  
SLVNT CDCL3  
EXREF 77.00 ppm  
BF 0.12 Hz  
RGAIN 60

C:\Users\alice\Desktop\Gousei\mitsunuma\hm0290-1column-1-1.als

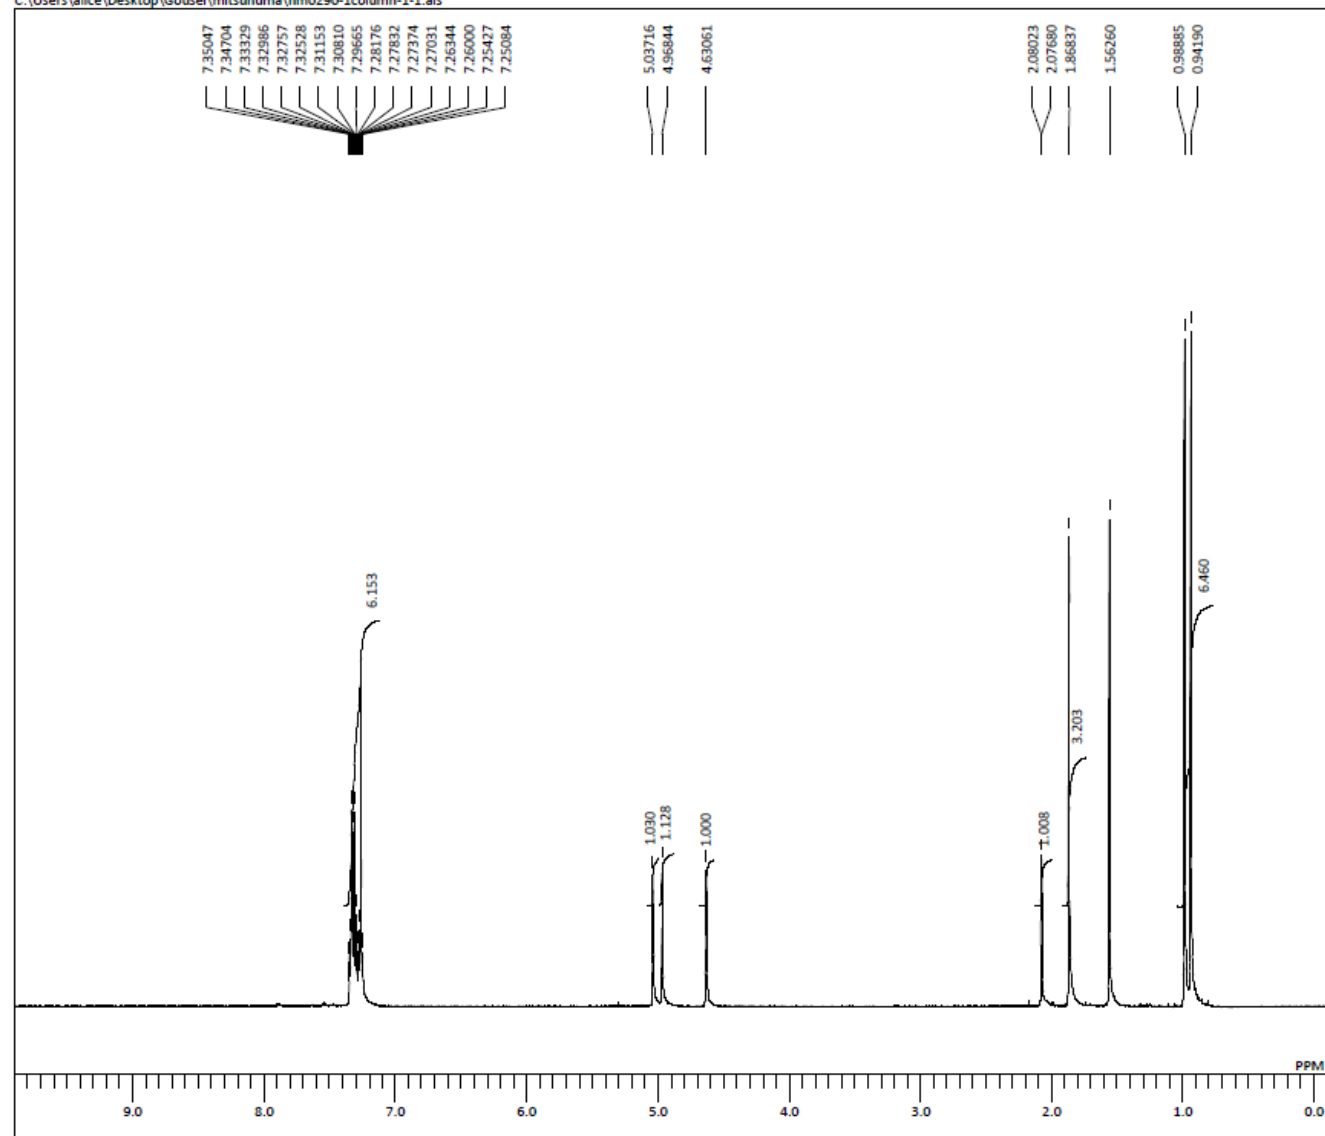

DFILE hm0290-1column-1-1.als  
COMNT  
DATIM 2018-06-29 18:17:57  
OBNUC 1H  
EXMOD proton.jpg  
OBFRQ 500.16 MHz  
OBSET 2.41 KHz  
OBFIN 6.01 Hz  
POINT 13107  
FREQU 7507.51 Hz  
SCANS 8  
ACQTM 1.7459 sec  
PD 5.0000 sec  
PW1 5.55 usec  
IRNUC 1H  
CTEMP 21.6 c  
SLVNT CDCL3  
EXREF 7.26 ppm  
BF 0.12 Hz  
RGAIN 32

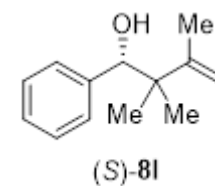

C:\Users\alice\Desktop\Gousei\mitsunuma\hm0290-1column 13C-1-1.als

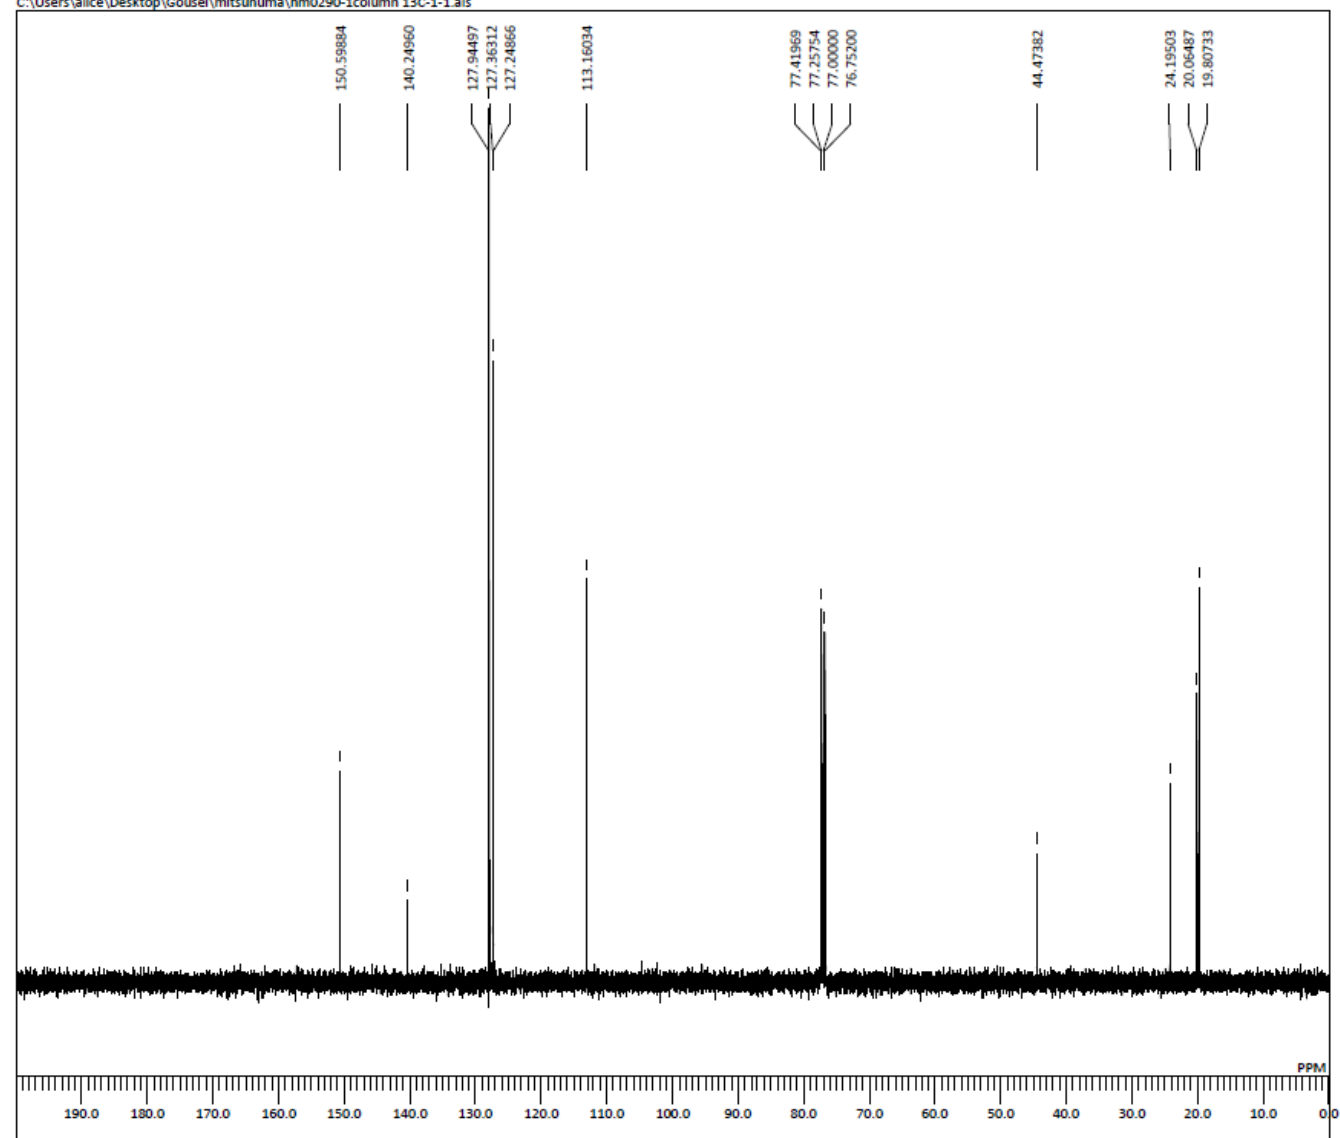

DFILE hm0290-1column 13C-1-1.als  
 COMNT  
 DATIM 2018-06-29 18:32:36  
 OBNUC 13C  
 EXMOD carbon.jpg  
 OBFREQ 125.77 MHz  
 OBSET 7.87 KHz  
 OBFIN 4.21 Hz  
 POINT 26214  
 FREQU 31446.54 Hz  
 SCANS 48  
 ACQTM 0.8336 sec  
 PD 2.0000 sec  
 PW1 3.40 usec  
 IRNUC 1H  
 CTEMP 21.5 c  
 SLVNT CDCL3  
 EXREF 77.00 ppm  
 BF 0.12 Hz  
 RGAIN 60

C:\Users\alice\Desktop\Gousei\mitsunuma\hm0464tm-1-1.als

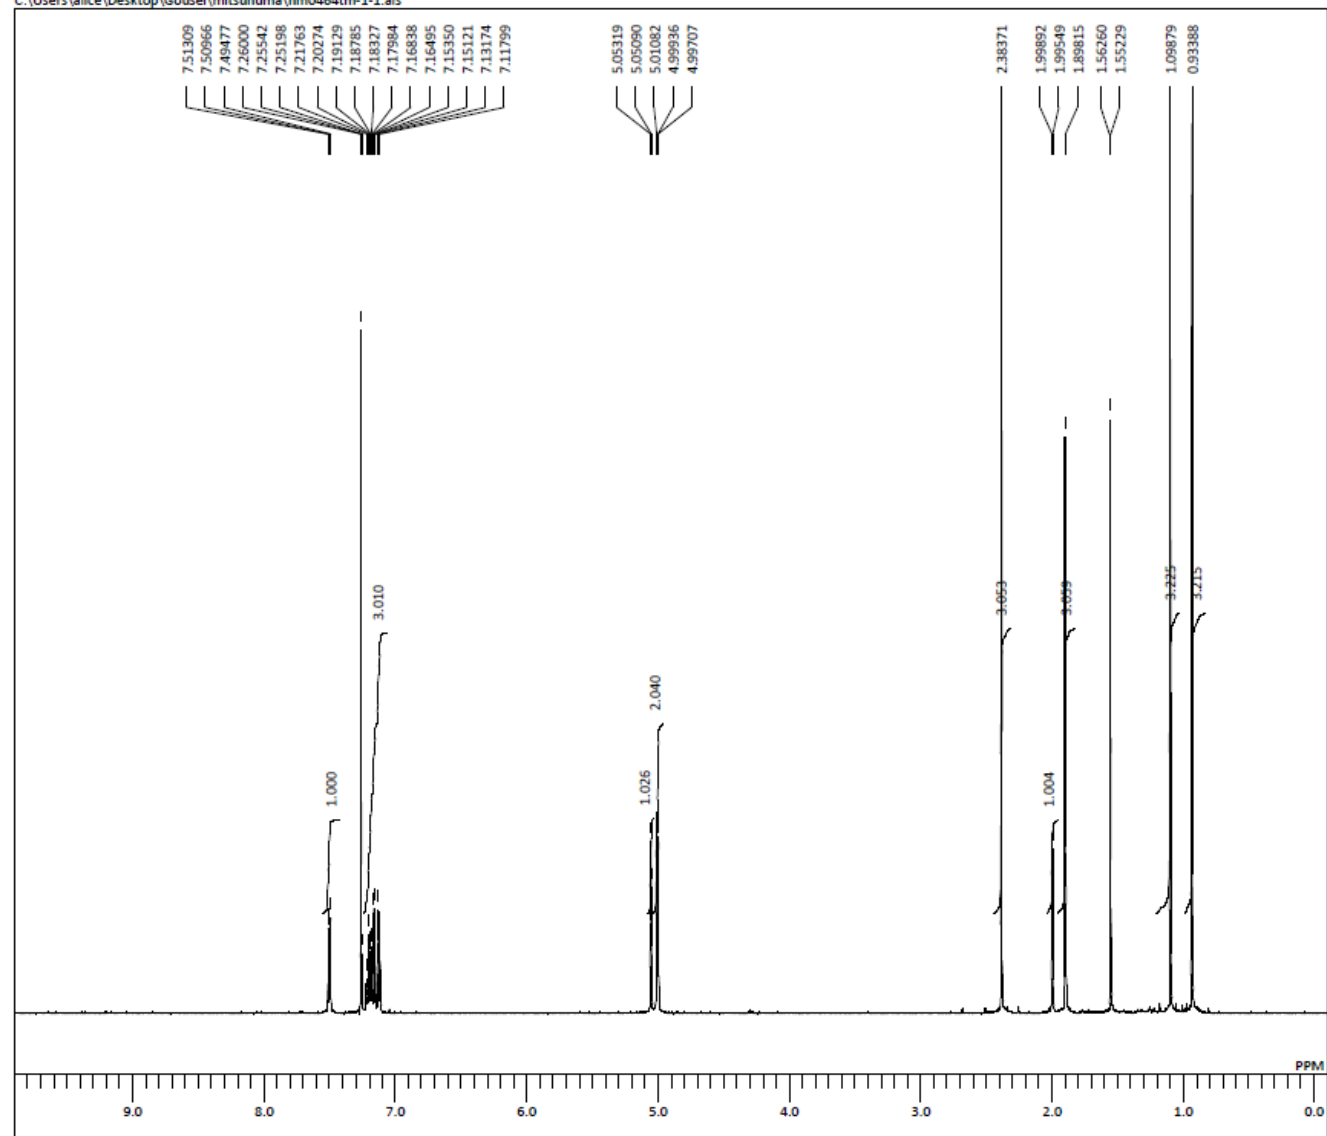

DFILE hm0464tm-1-1.als  
 COMMT  
 DATIM 2018-09-11 20:58:10  
 OBNUC 1H  
 EXMOD proton.jpg  
 OBFREQ 500.16 MHz  
 OBSET 2.41 KHz  
 OBFIN 6.01 Hz  
 POINT 13107  
 FREQU 7507.51 Hz  
 SCANS 8  
 ACQTM 1.7459 sec  
 PD 5.0000 sec  
 PW1 5.55 usec  
 IRNUC 1H  
 CTEMP 21.8 c  
 SLVNT CDCL3  
 EXREF 7.26 ppm  
 BF 0.12 Hz  
 RGAIN 32

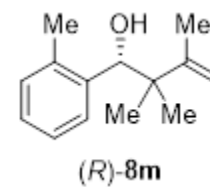

H:\NMR\Mitsunuma\Allylation\ECS400data\hm0464tm13c-1-1.als

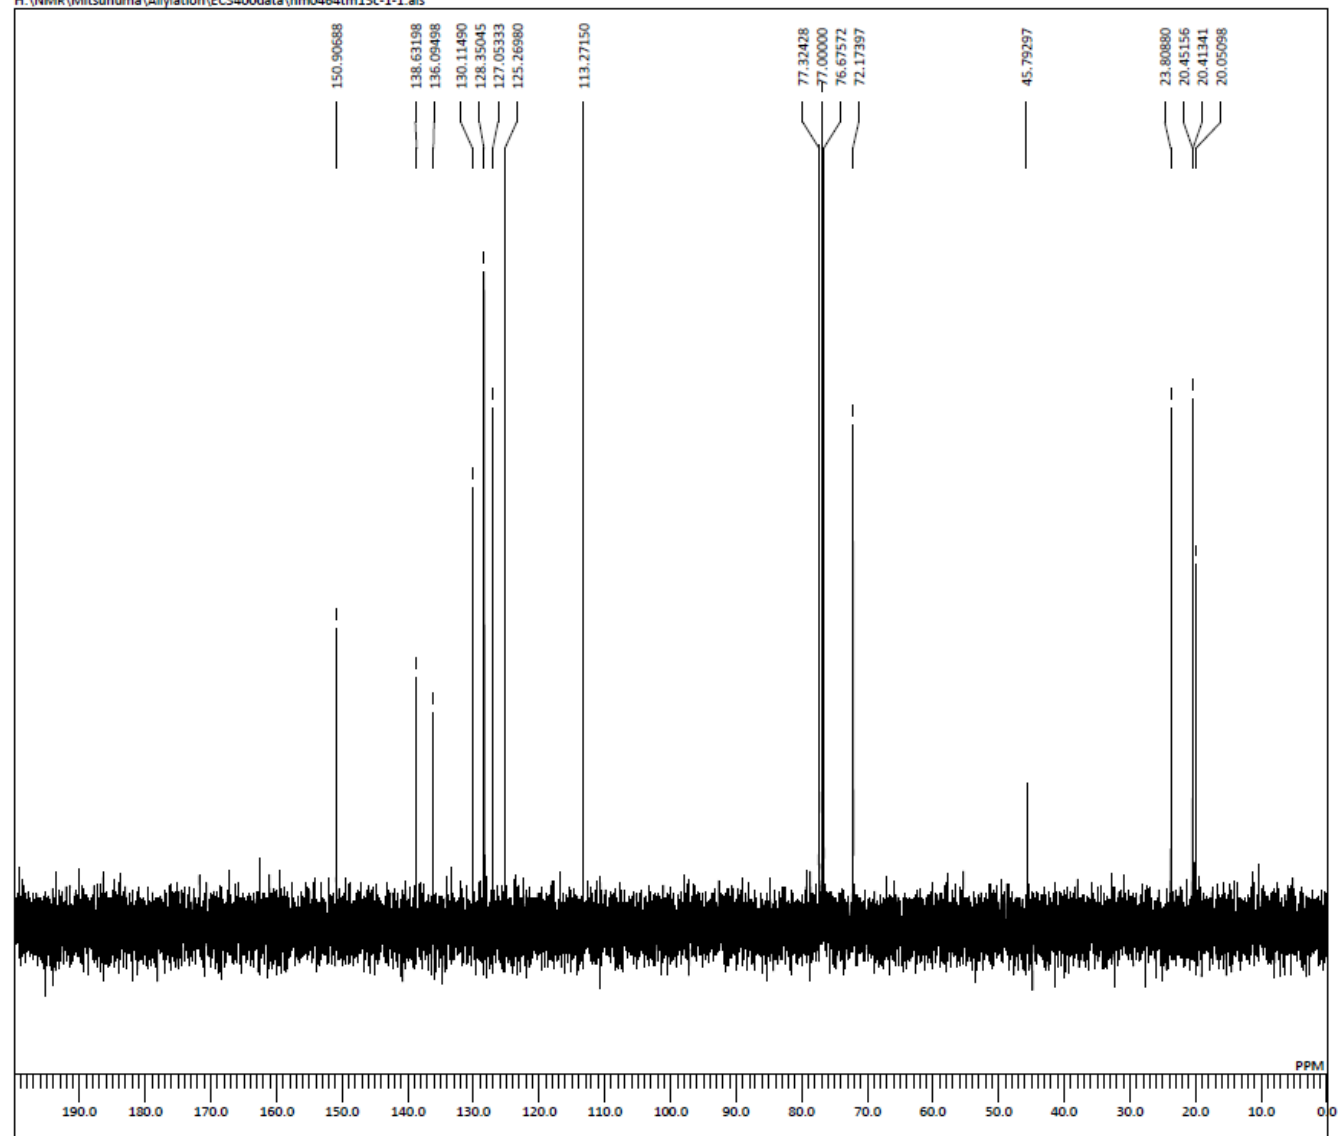

DFILE hm0464tm13c-1-1.als  
 COMMT  
 DATIM 11-09-2018 22:50:17  
 OBNUC 13C  
 EXMOD carbon.jpg  
 OBFREQ 98.52 MHz  
 OBSET 4.64 KHz  
 OBFIN 8.74 Hz  
 POINT 26214  
 FREQU 24630.54 Hz  
 SCANS 20  
 ACQTM 1.0643 sec  
 PD 2.0000 sec  
 PW1 3.12 usec  
 IRNUC 1H  
 CTEMP 20.5 c  
 SLVNT CDCL3  
 EXREF 77.00 ppm  
 BF 0.12 Hz  
 RGAIN 60

C:\Users\alice\Desktop\Gousei\mitsunuma\hm0472tm-1-1.als

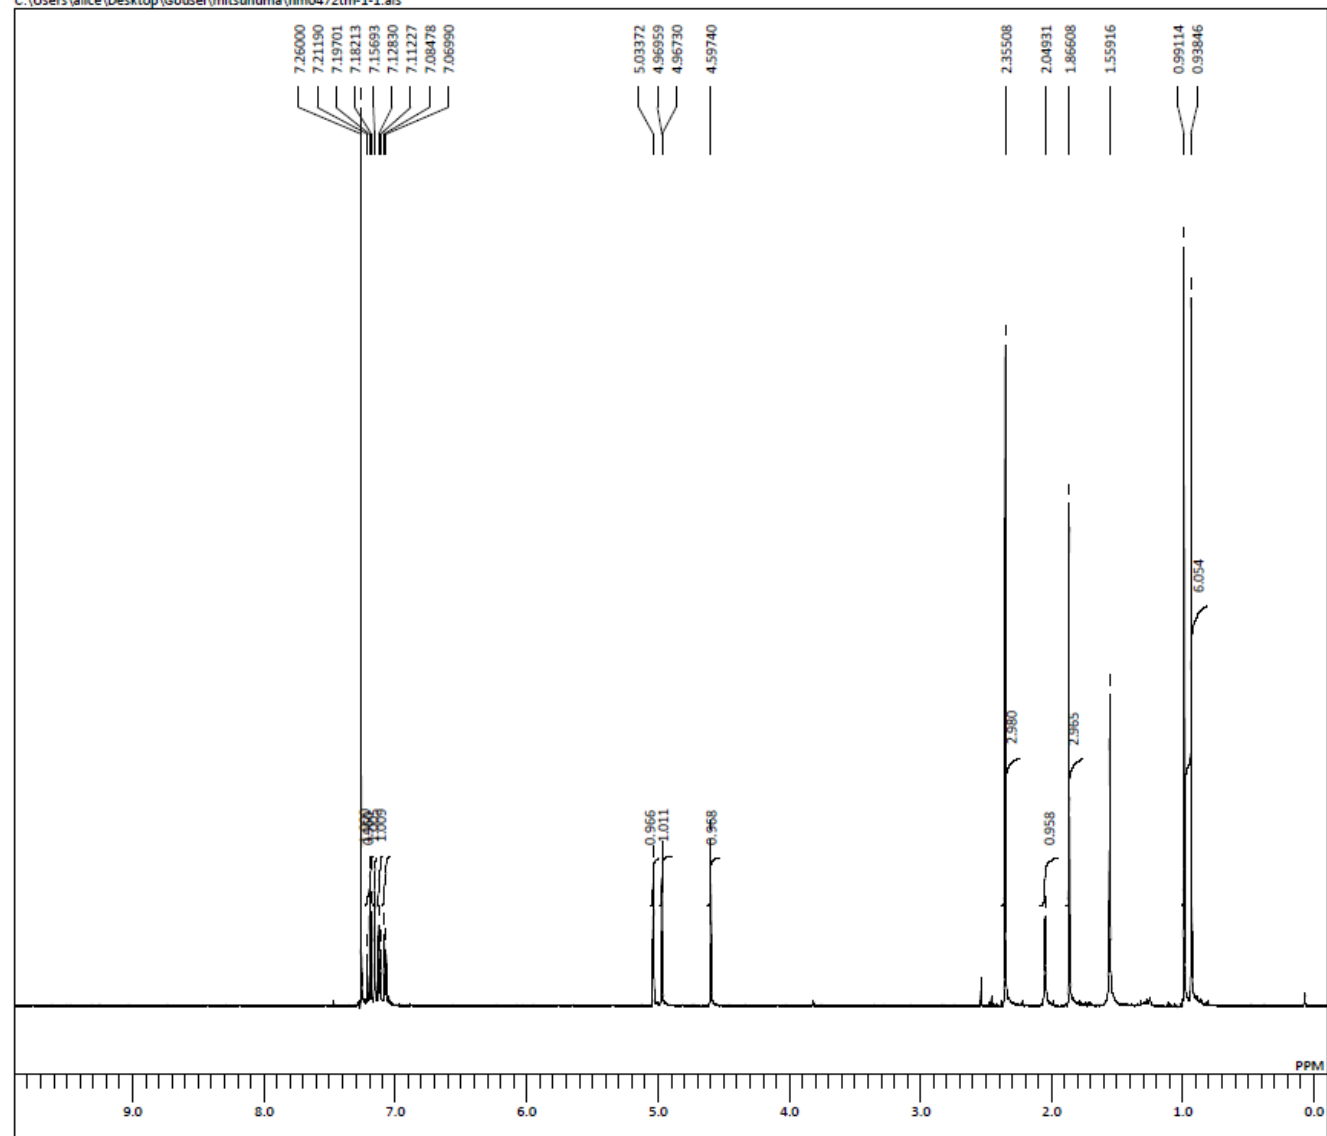

DFILE hm0472tm-1-1.als  
 COMMT  
 DATIM 2018-09-13 21:59:42  
 OBNUC 1H  
 EXMOD proton.jpg  
 OBFREQ 500.16 MHz  
 OBSET 2.41 KHz  
 OBFIN 6.01 Hz  
 POINT 13107  
 FREQU 7507.51 Hz  
 SCANS 8  
 ACQTM 1.7459 sec  
 PD 5.0000 sec  
 PW1 5.55 usec  
 IRNUC 1H  
 CTEMP 21.4 c  
 SLVNT CDCL3  
 EXREF 7.26 ppm  
 BF 0.12 Hz  
 RGAIN 32

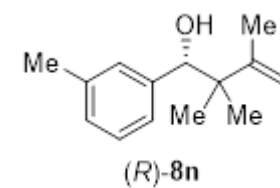

C:\Users\alice\Desktop\Gousei\mitsunuma\hm0472tm13C-1-1.als

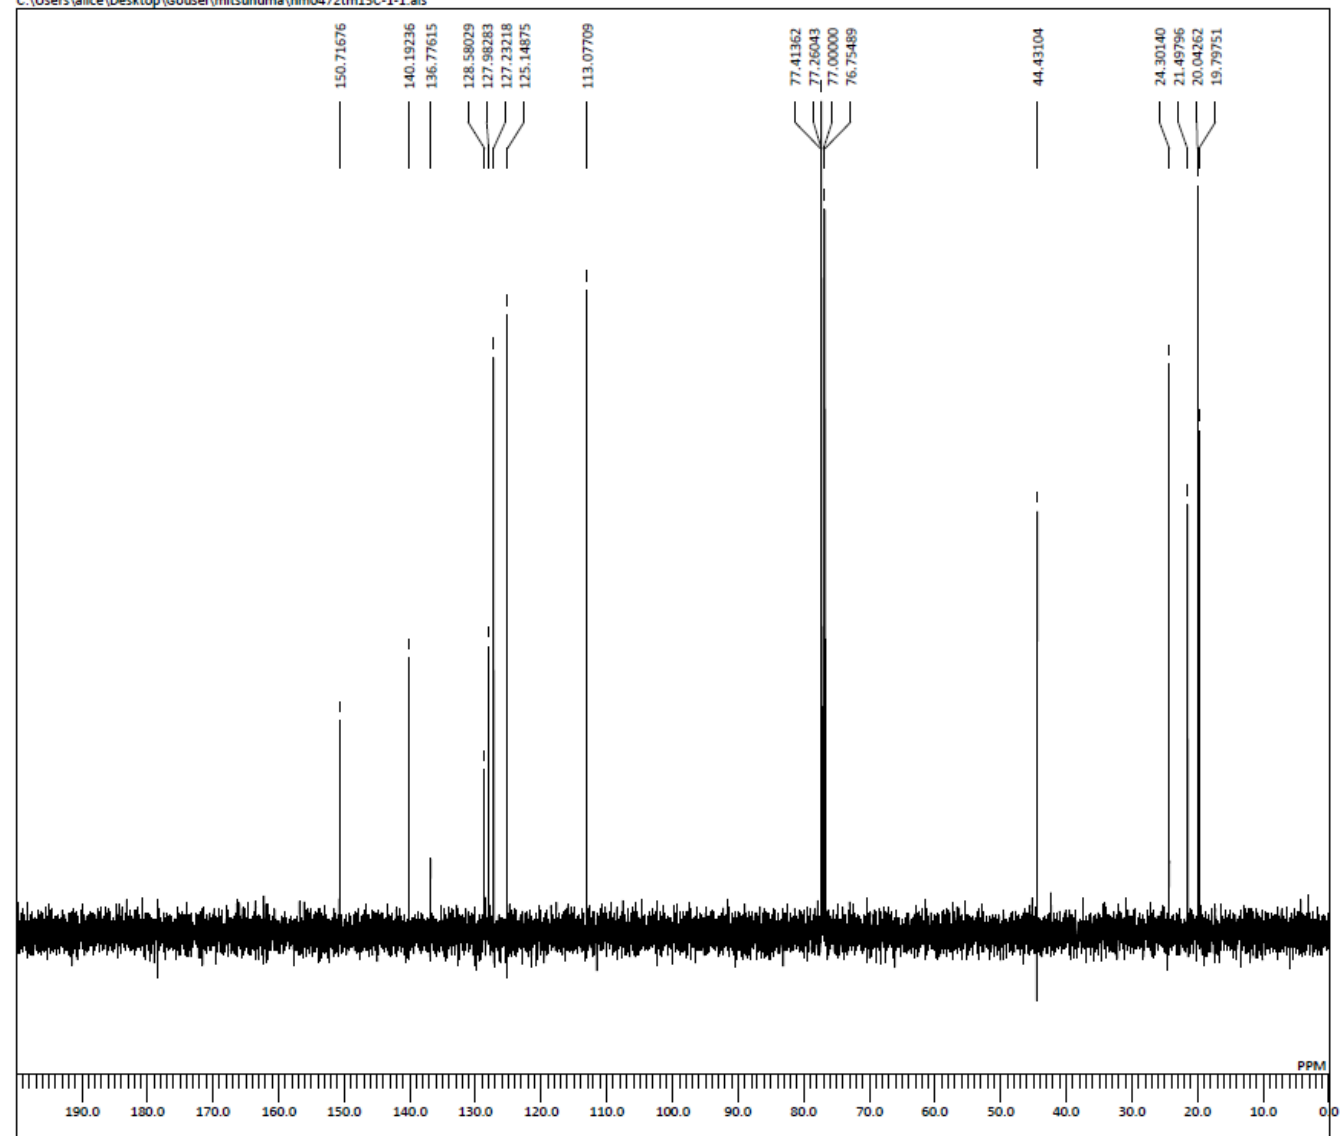

DFILE hm0472tm13C-1-1.als  
COMNT  
DATIM 2018-09-13 22:16:04  
OBNUC 13C  
EXMOD carbon.jpg  
OBFREQ 125.77 MHz  
OBSET 1.58 kHz  
OBFIN 5.95 Hz  
POINT 26214  
FREQU 50505.05 Hz  
SCANS 24  
ACQTM 0.5190 sec  
PD 2.0000 sec  
PW1 3.40 usec  
IRNUC 1H  
CTEMP 21.3 c  
SLVNT CDCL3  
EXREF 77.00 ppm  
BF 0.12 Hz  
RGAIN 58

C:\Users\alice\Desktop\Gousei\mitsunuma\hm0474tm-1-1.als

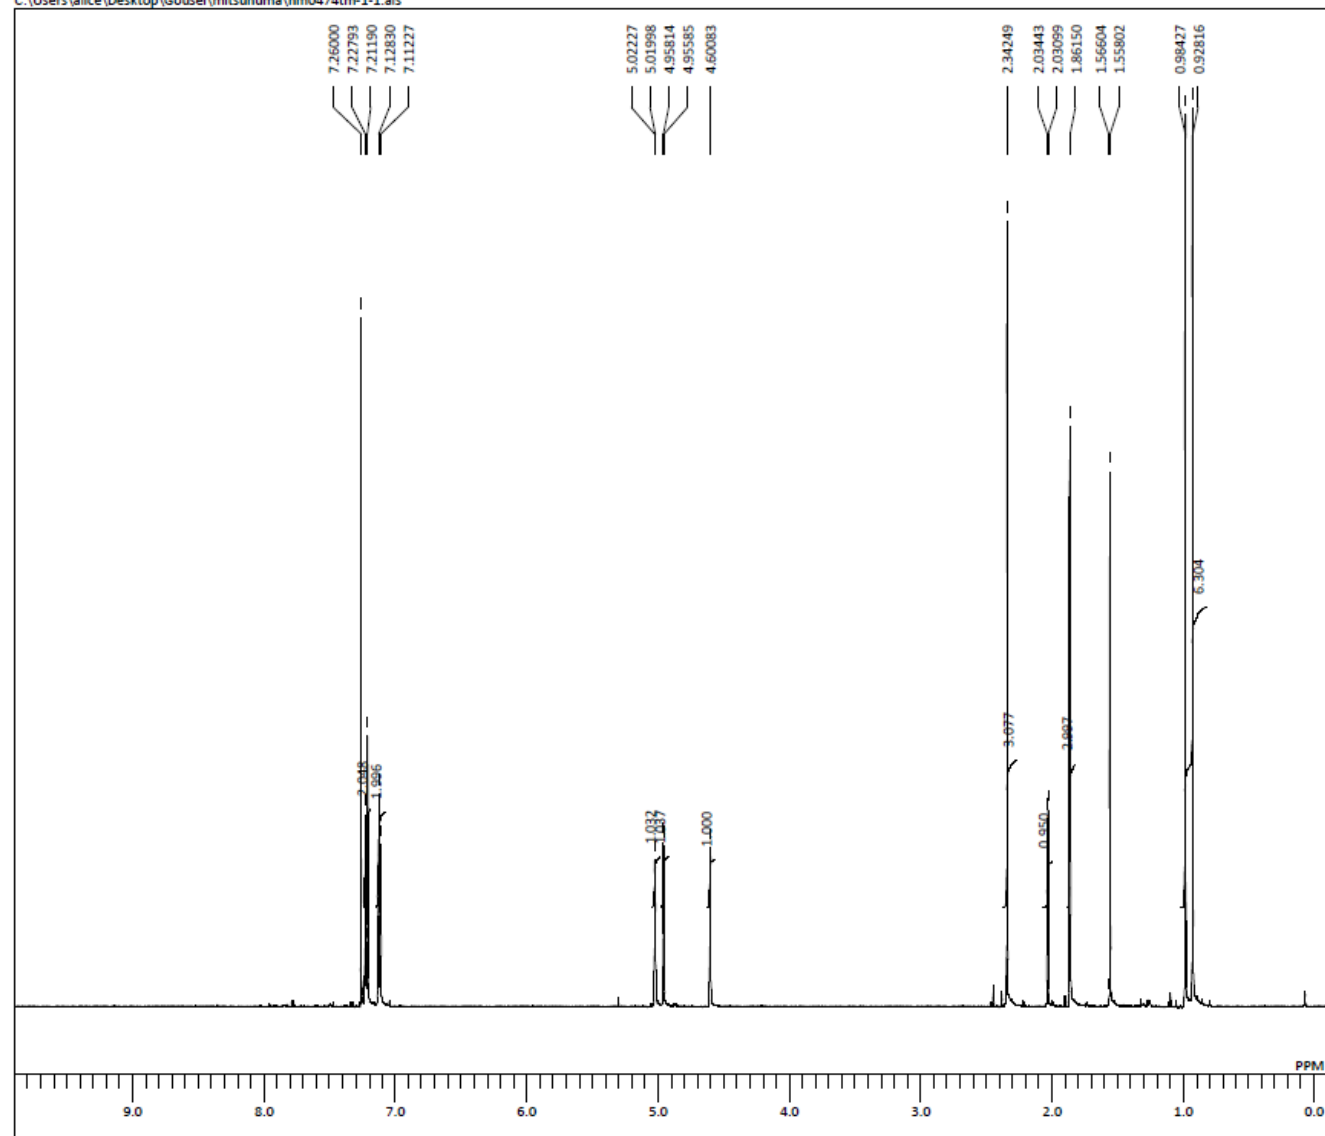

DFILE hm0474tm-1-1.als  
 COMMT  
 DATIM 2018-09-13 22:03:22  
 OBNUC 1H  
 EXMOD proton.jpg  
 OBFREQ 500.16 MHz  
 OBSET 2.41 KHz  
 OBFIN 6.01 Hz  
 POINT 13107  
 FREQU 7507.51 Hz  
 SCANS 8  
 ACQTM 1.7459 sec  
 PD 5.0000 sec  
 PW1 5.55 usec  
 IRNUC 1H  
 CTEMP 21.4 c  
 SLVNT CDCL3  
 EXREF 7.26 ppm  
 BF 0.12 Hz  
 RGAIN 34

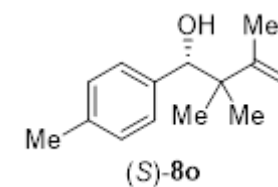

C:\Users\alice\Desktop\Gousei\mitsunuma\hm0474tm13C-1-1.als

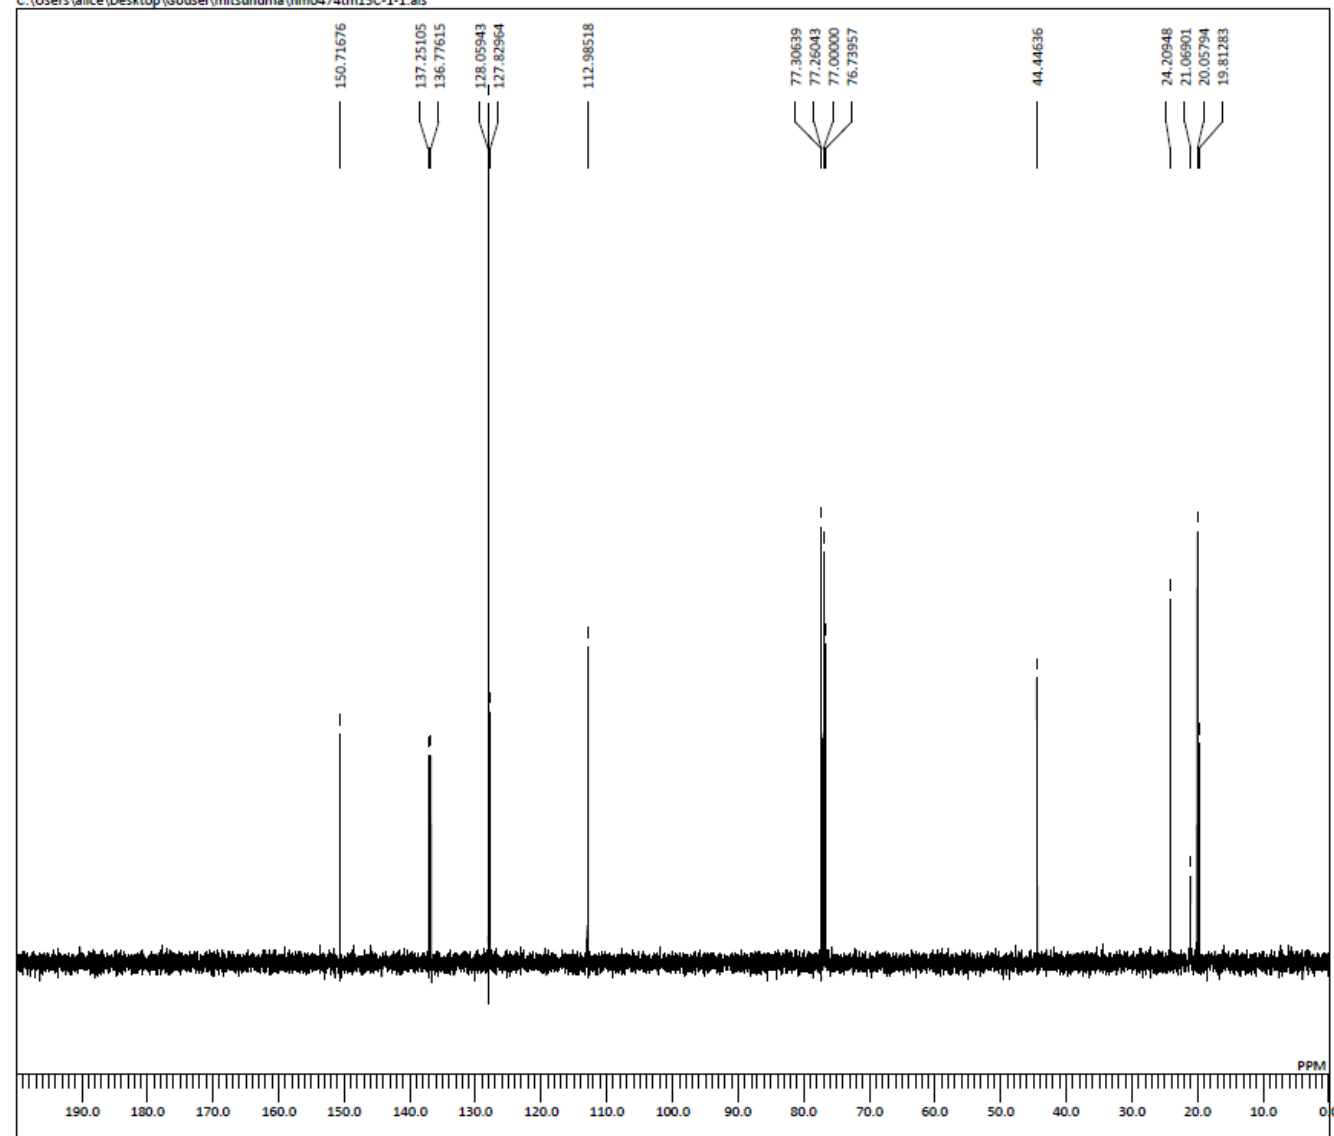

DFILE hm0474tm13C-1-1.als  
COMNT  
DATIM 2018-09-13 22:19:23  
OBNUC 13C  
EXMOD carbon.jpg  
OBFREQ 125.77 MHz  
OBSET 1.58 kHz  
OBFIN 5.95 Hz  
POINT 26214  
FREQU 50505.05 Hz  
SCANS 25  
ACQTM 0.5190 sec  
PD 2.0000 sec  
PW1 3.40 usec  
IRNUC 1H  
CTEMP 21.5 c  
SLVNT CDCL3  
EXREF 77.00 ppm  
BF 0.12 Hz  
RGAIN 58

C:\Users\alice\Desktop\Gousei\mitsunuma\hm0471tm-1-1.als

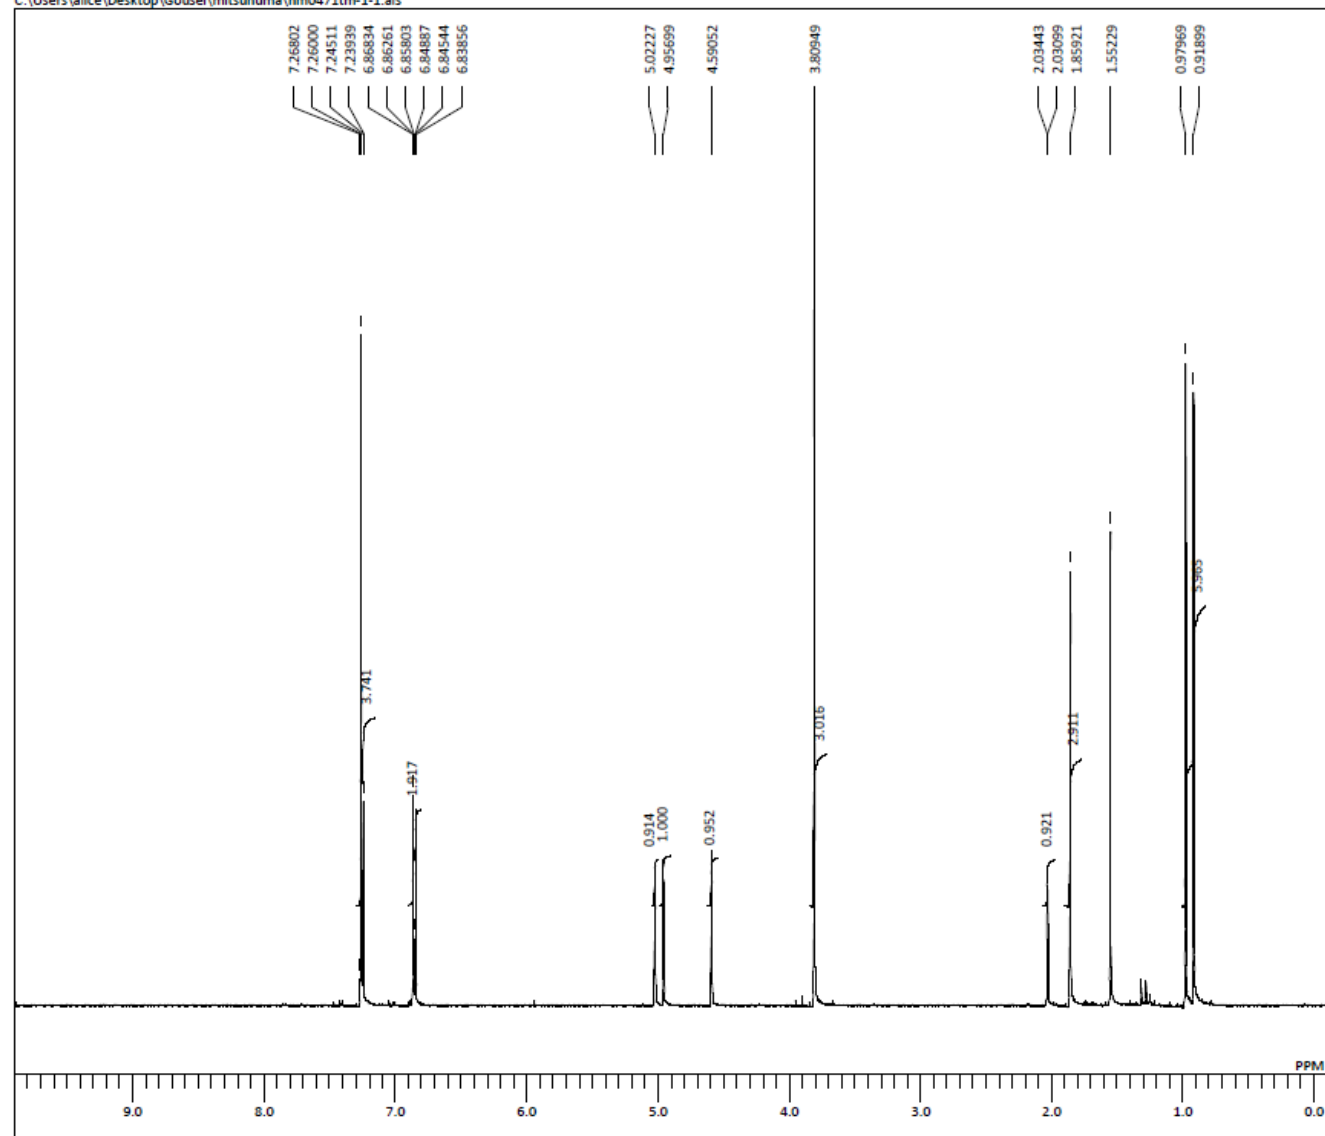

DFILE hm0471tm-1-1.als  
 COMNT  
 DATIM 2018-09-11 21:09:39  
 OBNUC 1H  
 EXMOD proton.jpg  
 OBFREQ 500.16 MHz  
 OBSET 2.41 KHz  
 OBFIN 6.01 Hz  
 POINT 13107  
 FREQU 7507.51 Hz  
 SCANS 8  
 ACQTM 1.7459 sec  
 PD 5.0000 sec  
 PW1 5.55 usec  
 IRNUC 1H  
 CTEMP 21.6 c  
 SLVNT CDCL3  
 EXREF 7.26 ppm  
 BF 0.12 Hz  
 RGAIN 32

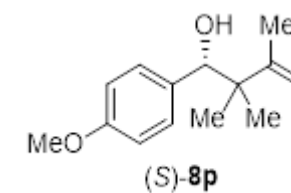

H:\NMR\Mitsunuma\Allylation\ECS400data\hm0471tm13c-1-1.als

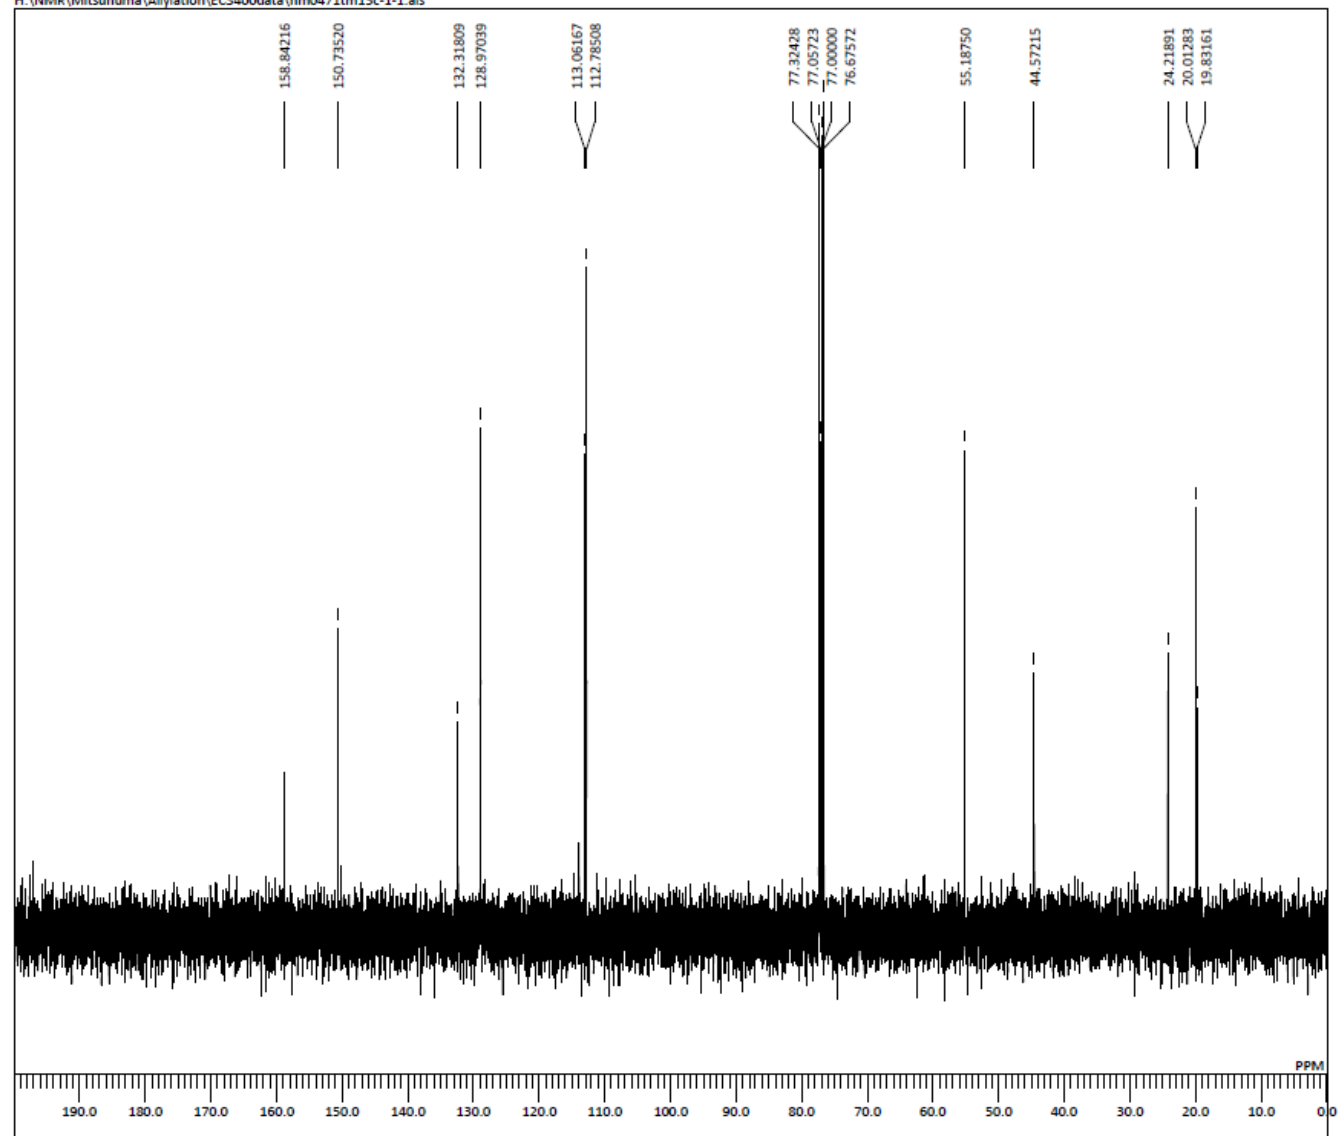

DFILE hm0471tm13c-1-1.als  
 COMMT  
 DATIM 11-09-2018 22:58:34  
 OBNUC 13C  
 EXMOD carbon.jpg  
 OBFREQ 98.52 MHz  
 OBSET 4.64 kHz  
 OBFIN 8.74 Hz  
 POINT 26214  
 FREQU 24630.54 Hz  
 SCANS 32  
 ACQTM 1.0643 sec  
 PD 2.0000 sec  
 PW1 3.12 usec  
 IRNUC 1H  
 CTEMP 20.5 c  
 SLVNT CDCL3  
 EXREF 77.00 ppm  
 BF 0.12 Hz  
 RGAIN 60

C:\Users\alice\Desktop\Gousei\mitsunuma\hm0565column-1-1.als

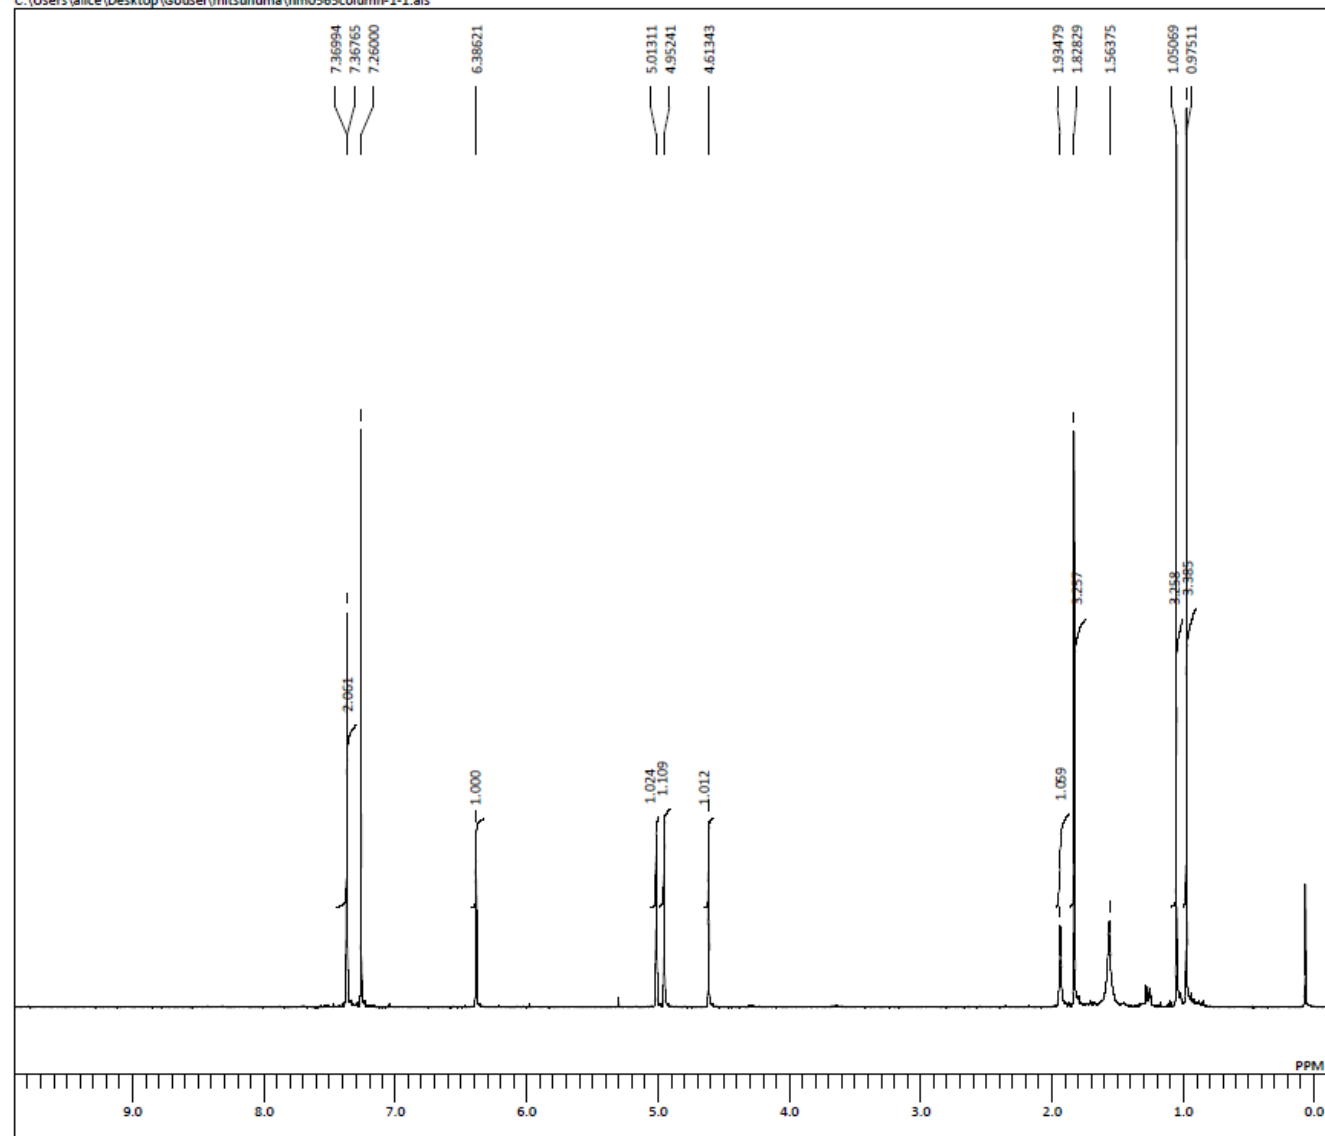

DFILE hm0565column-1-1.als  
 COMMT  
 DATIM 2018-10-05 22:27:10  
 OBNUC 1H  
 EXMOD proton.jpg  
 OBFREQ 500.16 MHz  
 OBSET 2.41 KHz  
 OBFIN 6.01 Hz  
 POINT 13107  
 FREQU 7507.51 Hz  
 SCANS 8  
 ACQTM 1.7459 sec  
 PD 5.0000 sec  
 PW1 5.55 usec  
 IRNUC 1H  
 CTEMP 21.6 c  
 SLVNT CDCL3  
 EXREF 7.26 ppm  
 BF 0.12 Hz  
 RGAIN 34

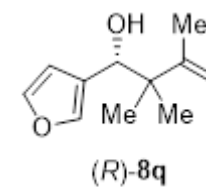

C:\Users\alice\Desktop\Gousei\mitsunuma\hm0565tm 13C-1-1.als

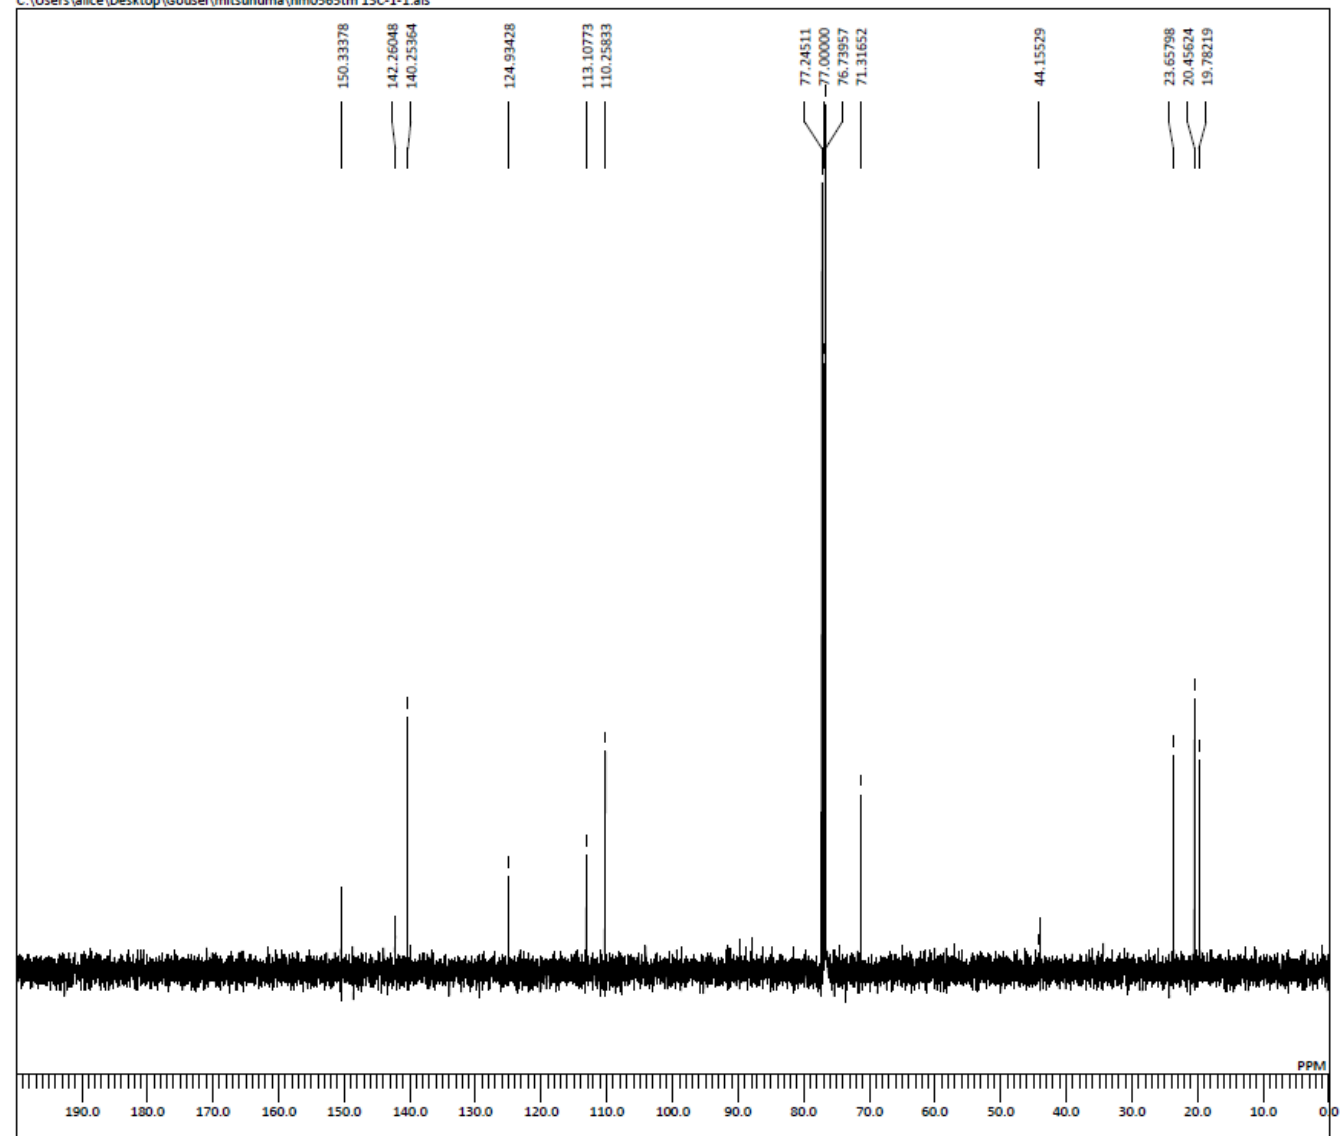

DFILE hm0565tm 13C-1-1.als  
 COMMT  
 DATIM 2018-10-05 23:09:42  
 OBNUC 13C  
 EXMOD carbon.jpg  
 OBFREQ 125.77 MHz  
 OBSET 1.58 KHz  
 OBFIN 5.95 Hz  
 POINT 26214  
 FREQU 50505.05 Hz  
 SCANS 60  
 ACQTM 0.5190 sec  
 PD 2.0000 sec  
 PW1 3.40 usec  
 IRNUC 1H  
 CTEMP 21.7 c  
 SLVNT CDCL3  
 EXREF 77.00 ppm  
 BF 0.12 Hz  
 RGAIN 58

C:\Users\alice\Desktop\Gousei\mitsunuma\hm0494tm-1-1.als

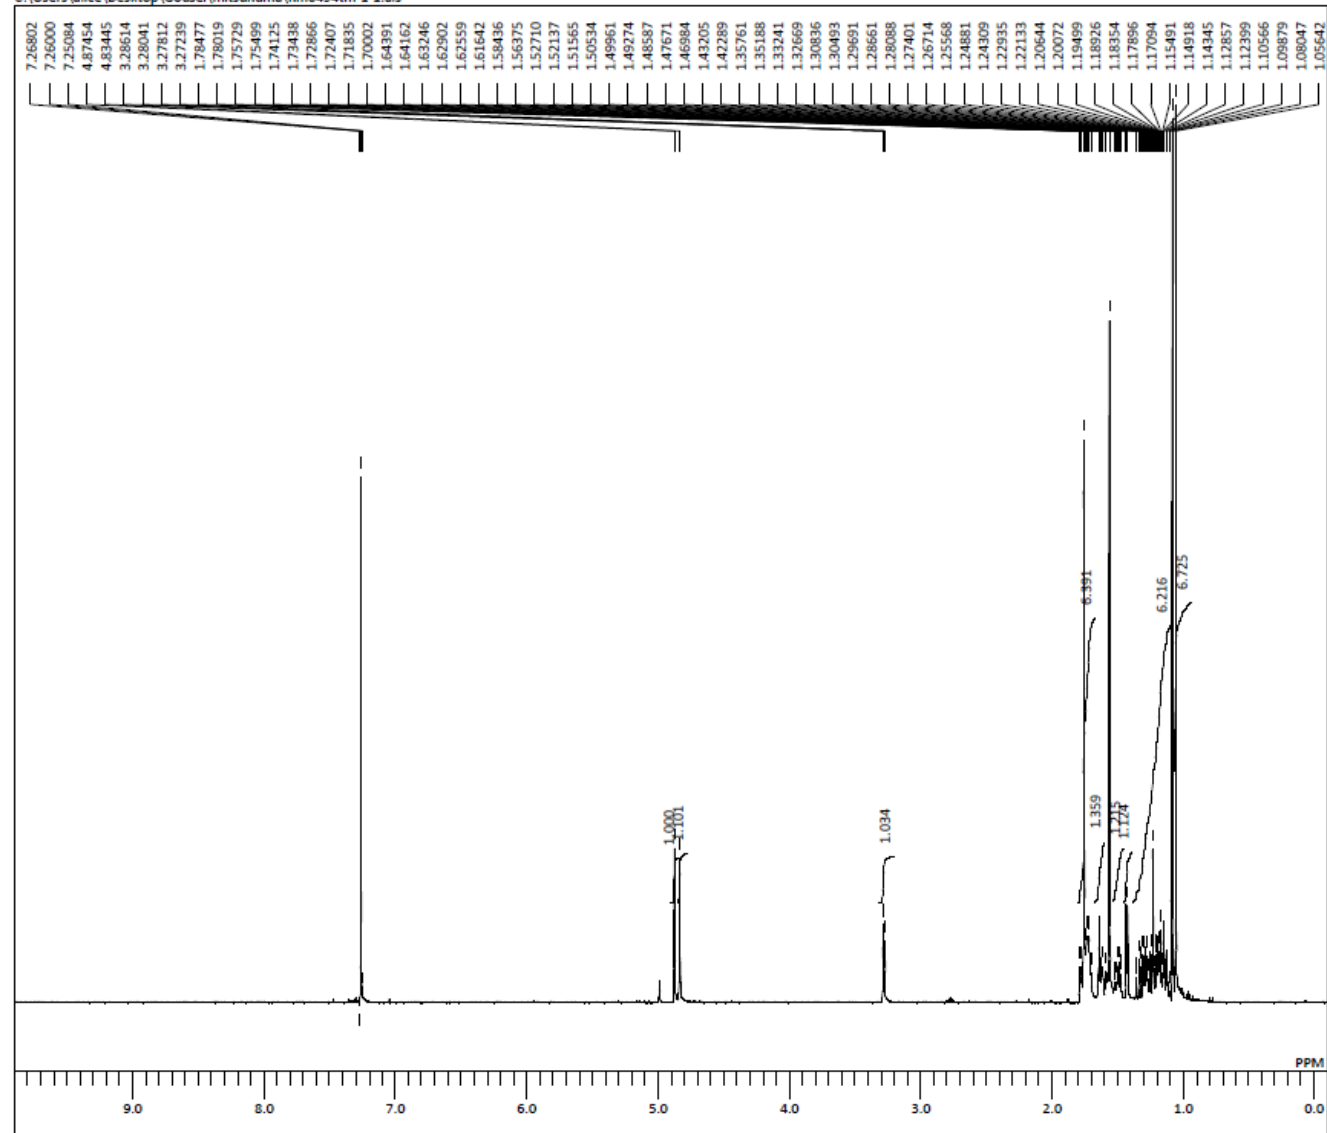

DFILE hm0494tm-1-1.als  
 COMMT  
 DATIM 2018-09-16 23:46:03  
 OBNUC 1H  
 EXMOD proton.jxp  
 OBFREQ 500.16 MHz  
 OBSET 2.41 KHz  
 OBFIN 6.01 Hz  
 POINT 13107  
 FREQU 7507.51 Hz  
 SCANS 8  
 ACQTM 1.7459 sec  
 PD 5.0000 sec  
 PW1 5.55 usec  
 IRNUC 1H  
 CTEMP 21.7 c  
 SLVNT CDCL3  
 EXREF 7.26 ppm  
 BF 0.12 Hz  
 RGAIN 32

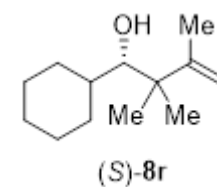

H:\NMR\Mitsunuma\Allylation\ECS400data\hm0494tm 13C-1-1.als

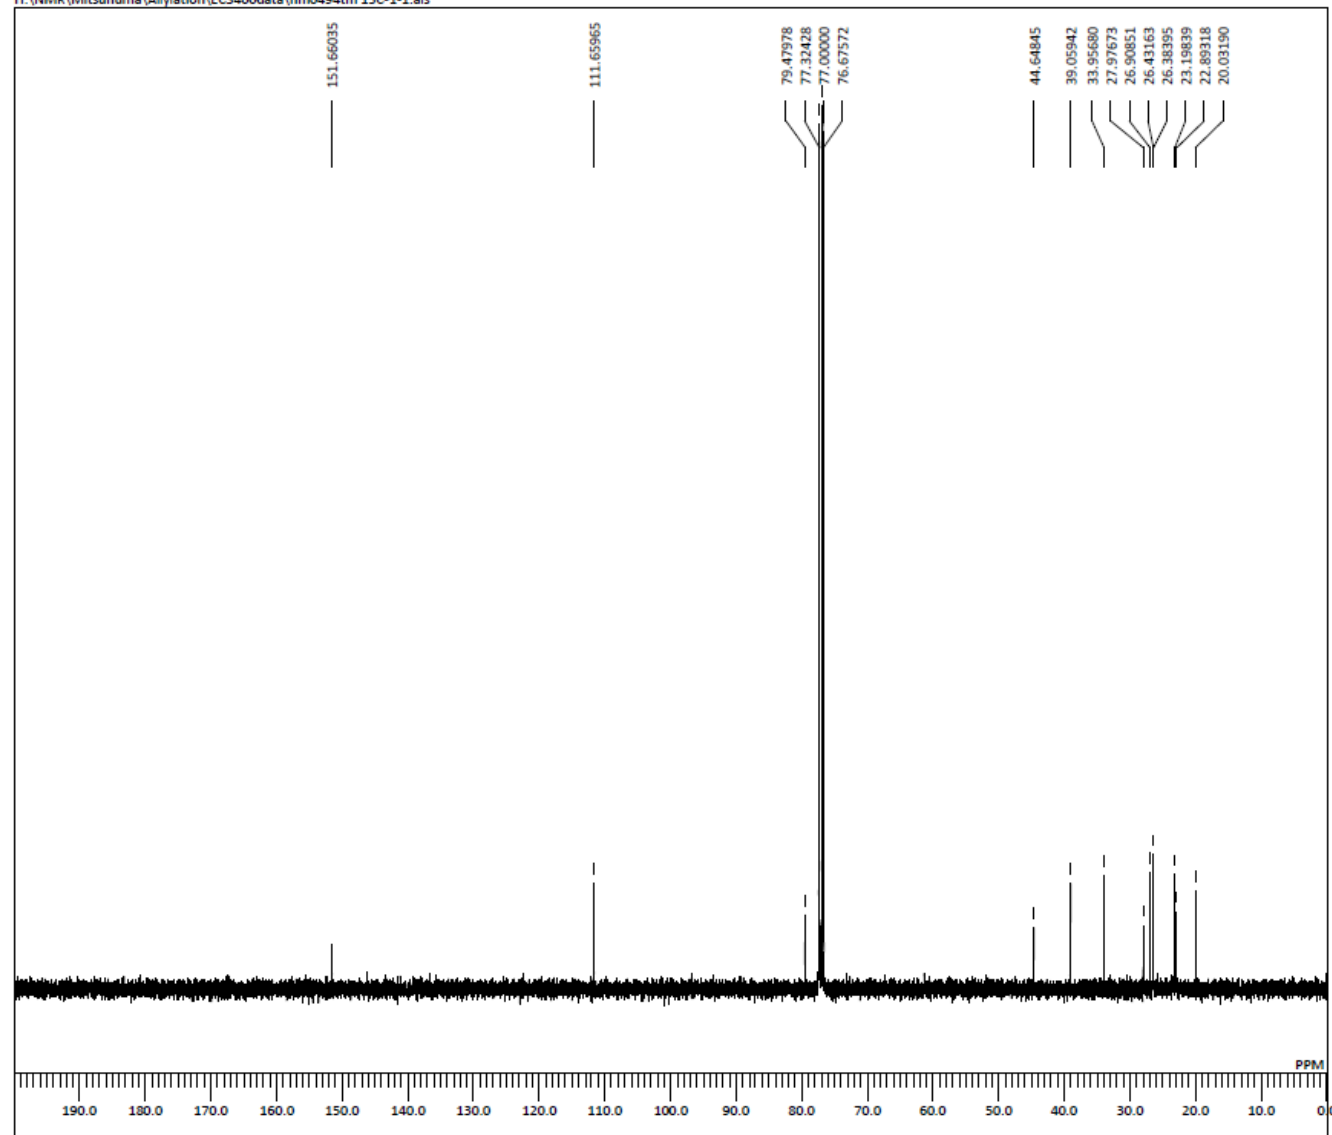

DFILE hm0494tm 13C-1-1.als  
COMNT  
DATIM 17-09-2018 19:04:55  
OBNUC 13C  
EXMOD carbon.jpg  
OBFRQ 98.52 MHz  
OBSET 4.64 KHz  
OBFIN 8.74 Hz  
POINT 26214  
FREQU 24630.54 Hz  
SCANS 640  
ACQTM 1.0643 sec  
PD 2.0000 sec  
PW1 3.12 usec  
IRNUC 1H  
CTEMP 20.5 c  
SLVNT CDCL3  
EXREF 77.00 ppm  
BF 0.12 Hz  
RGAIN 60

C:\Users\alice\Desktop\Gousei\mitsunuma\hm0485tm-1-1.als

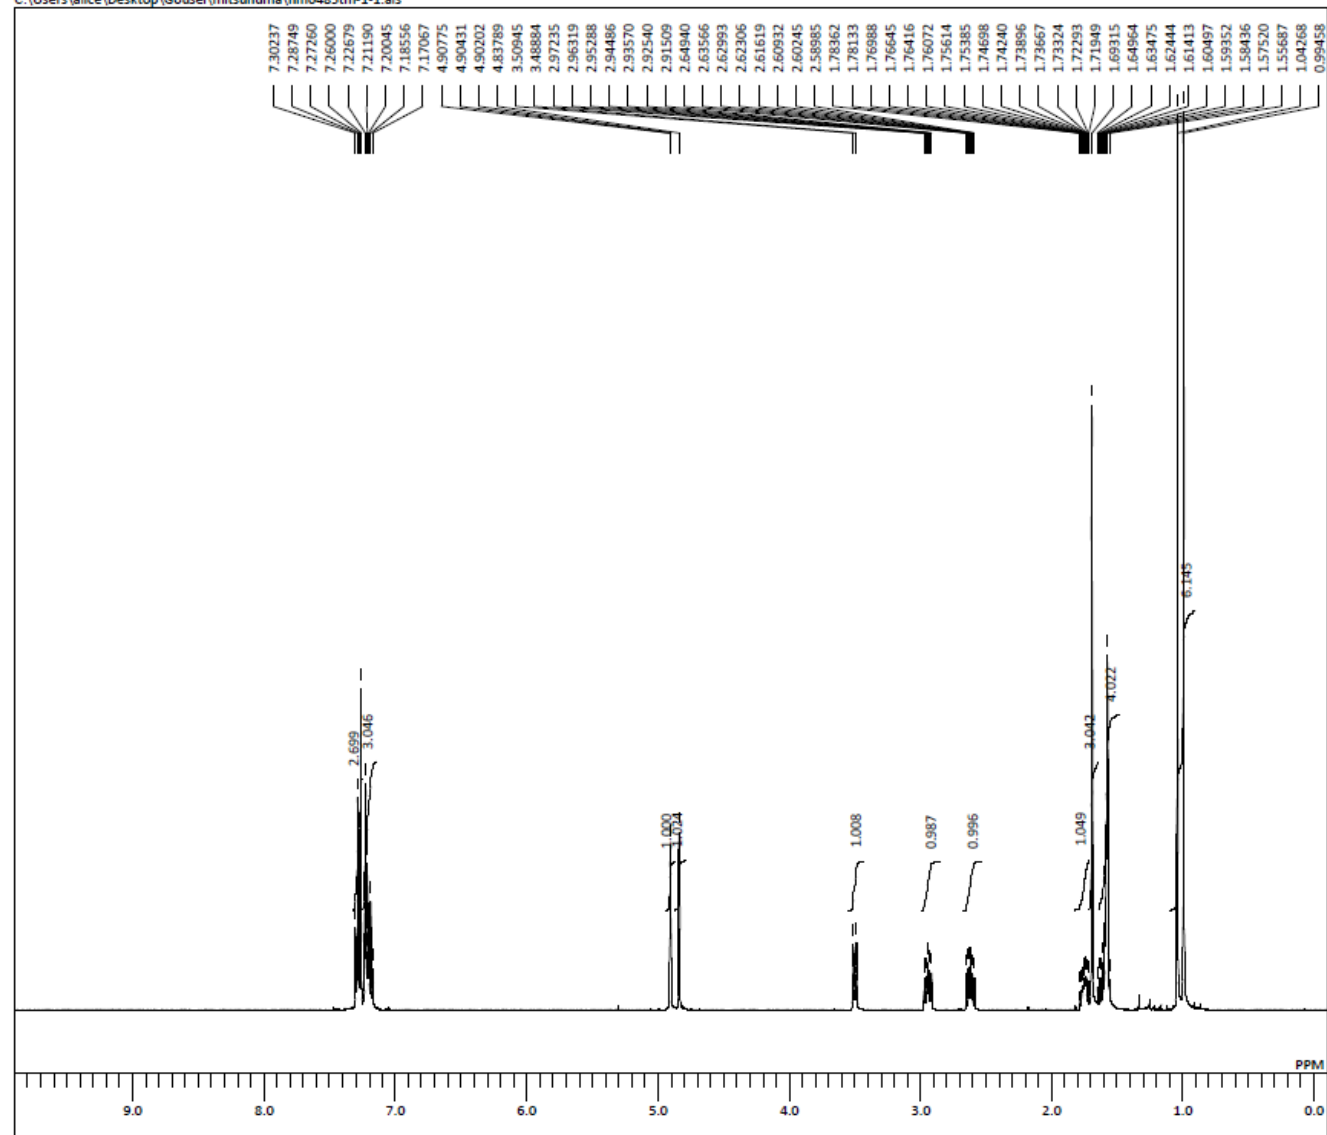

DFILE hm0485tm-1-1.als  
 COMMT  
 DATIM 2018-09-18 10:24:20  
 OBNUC 1H  
 EXMOD proton.jxp  
 OBFREQ 500.16 MHz  
 OBSET 2.41 KHz  
 OBFIN 6.01 Hz  
 POINT 13107  
 FREQU 7507.51 Hz  
 SCANS 8  
 ACQTM 1.7459 sec  
 PD 5.0000 sec  
 PW1 5.55 usec  
 IRNUC 1H  
 CTEMP 21.9 c  
 SLVNT CDCL3  
 EXREF 7.26 ppm  
 BF 0.12 Hz  
 RGAIN 32

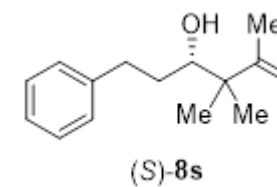

C:\Users\alice\Desktop\Gousei\mitsunuma\hm0485tm 13C-1-1.als

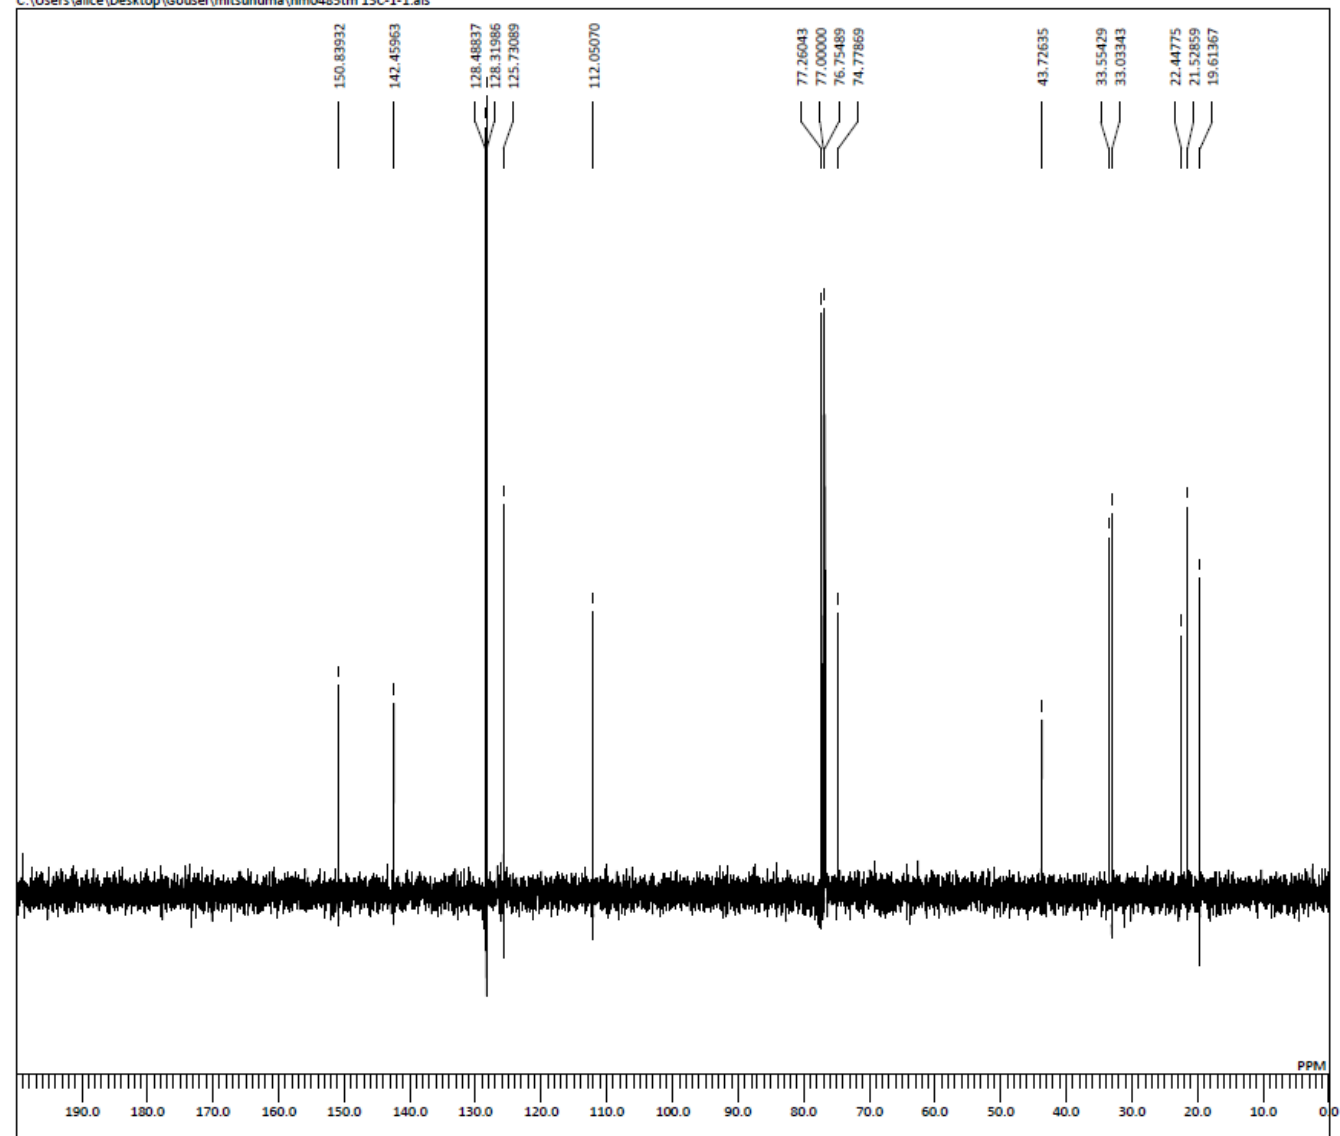

DFILE hm0485tm 13C-1-1.als  
 COMMT  
 DATIM 2018-09-18 10:49:26  
 OBNUC 13C  
 EXMOD carbon.jpg  
 OBFREQ 125.77 MHz  
 OBSET 1.58 KHz  
 OBFIN 5.95 Hz  
 POINT 26214  
 FREQU 50505.05 Hz  
 SCANS 20  
 ACQTM 0.5190 sec  
 PD 2.0000 sec  
 PW1 3.40 usec  
 IRNUC 1H  
 CTEMP 21.8 c  
 SLVNT CDCL3  
 EXREF 77.00 ppm  
 BF 0.12 Hz  
 RGAIN 58

C:\Users\alice\Desktop\Gousei\mitsunuma\hm0487m-1-1.als

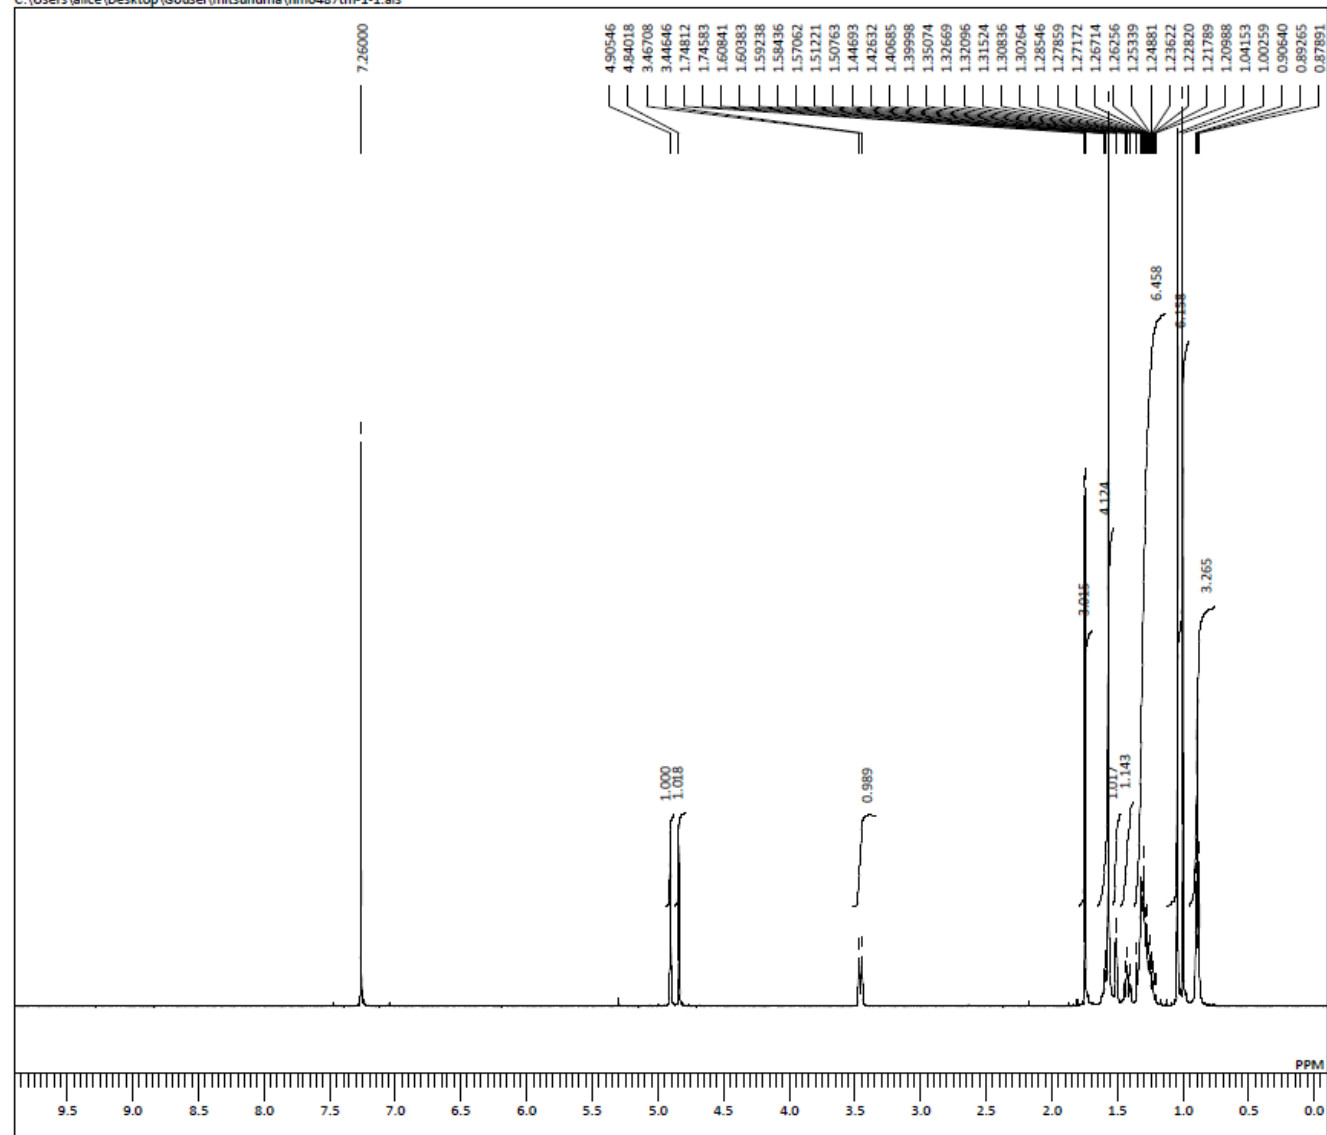

DFILE hm0487m-1-1.als  
 COMMT  
 DATIM 2018-09-18 10:31:42  
 OBNUC 1H  
 EXMOD proton.jpg  
 OBFREQ 500.16 MHz  
 OBSET 2.41 KHz  
 OBFIN 6.01 Hz  
 POINT 13107  
 FREQU 7507.51 Hz  
 SCANS 8  
 ACQTM 1.7459 sec  
 PD 5.0000 sec  
 PW1 5.55 usec  
 IRNUC 1H  
 CTEMP 21.7 c  
 SLVNT CDCL3  
 EXREF 7.26 ppm  
 BF 0.12 Hz  
 RGAIN 32

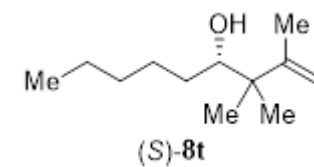

C:\Users\alice\Desktop\Gousei\mitsunuma\hm0487tm 13C-1-1.als

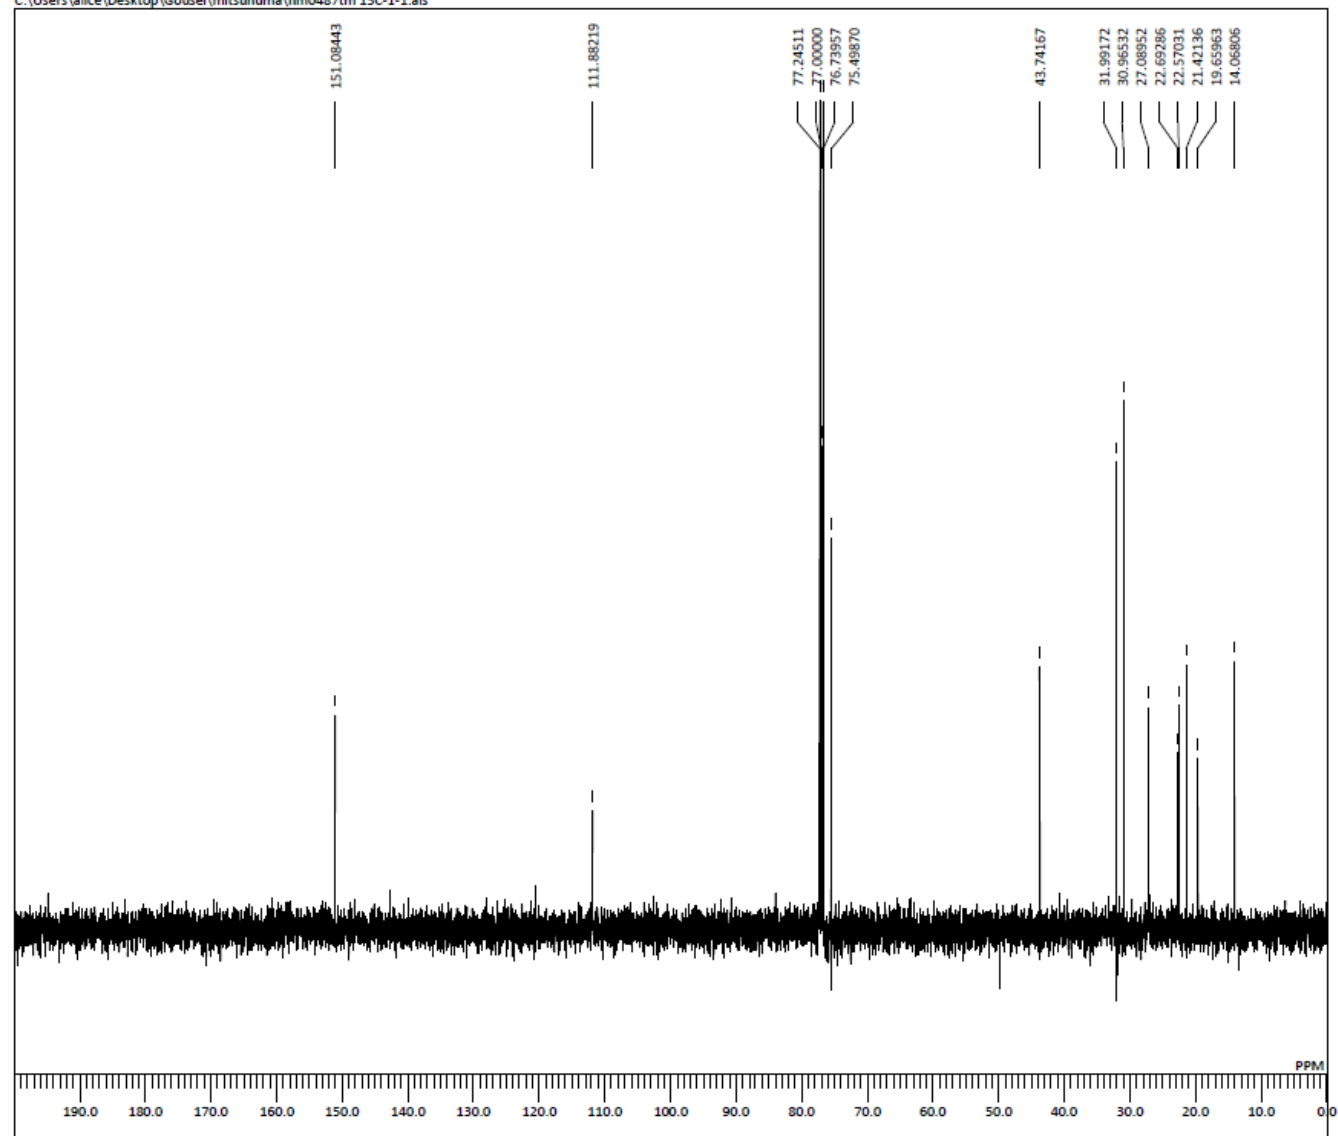

DFILE hm0487tm 13C-1-1.als  
 COMMT  
 DATIM 2018-09-18 10:55:58  
 OBNUC 13C  
 EXMOD carbon.jpg  
 OBFREQ 125.77 MHz  
 OBSET 1.58 KHz  
 OBFIN 5.95 Hz  
 POINT 26214  
 FREQU 50505.05 Hz  
 SCANS 25  
 ACQTM 0.5190 sec  
 PD 2.0000 sec  
 PW1 3.40 usec  
 IRNUC 1H  
 CTEMP 21.6 c  
 SLVNT CDCL3  
 EXREF 77.00 ppm  
 BF 0.12 Hz  
 RGAIN 60

1.026  
1.254  
1.186  
4.195  
0.997  
1.008  
7.26000

4.90088  
4.83574  
3.57129  
3.56786  
3.54724  
1.84661  
1.83859  
1.83287  
1.82600  
1.81913  
1.81226  
1.80538  
1.79966  
1.79164  
1.78592  
1.77904  
1.77332  
1.76530  
1.74927  
1.57634  
1.45839  
1.45266  
1.30607  
1.29920  
1.28546  
1.27859  
1.27057  
1.25798  
1.24996  
1.16407  
1.16178  
1.14116  
1.13658  
1.11597  
1.11368  
1.04382  
0.99229  
0.95221  
0.93846  
0.91098  
0.89838

CC(C)C[C@H](O)C(C)(C)C=C  
(S)-8u

C:\Users\alice\Desktop\Gousei\mitsunuma\hm0488tm 13C-1-1.als

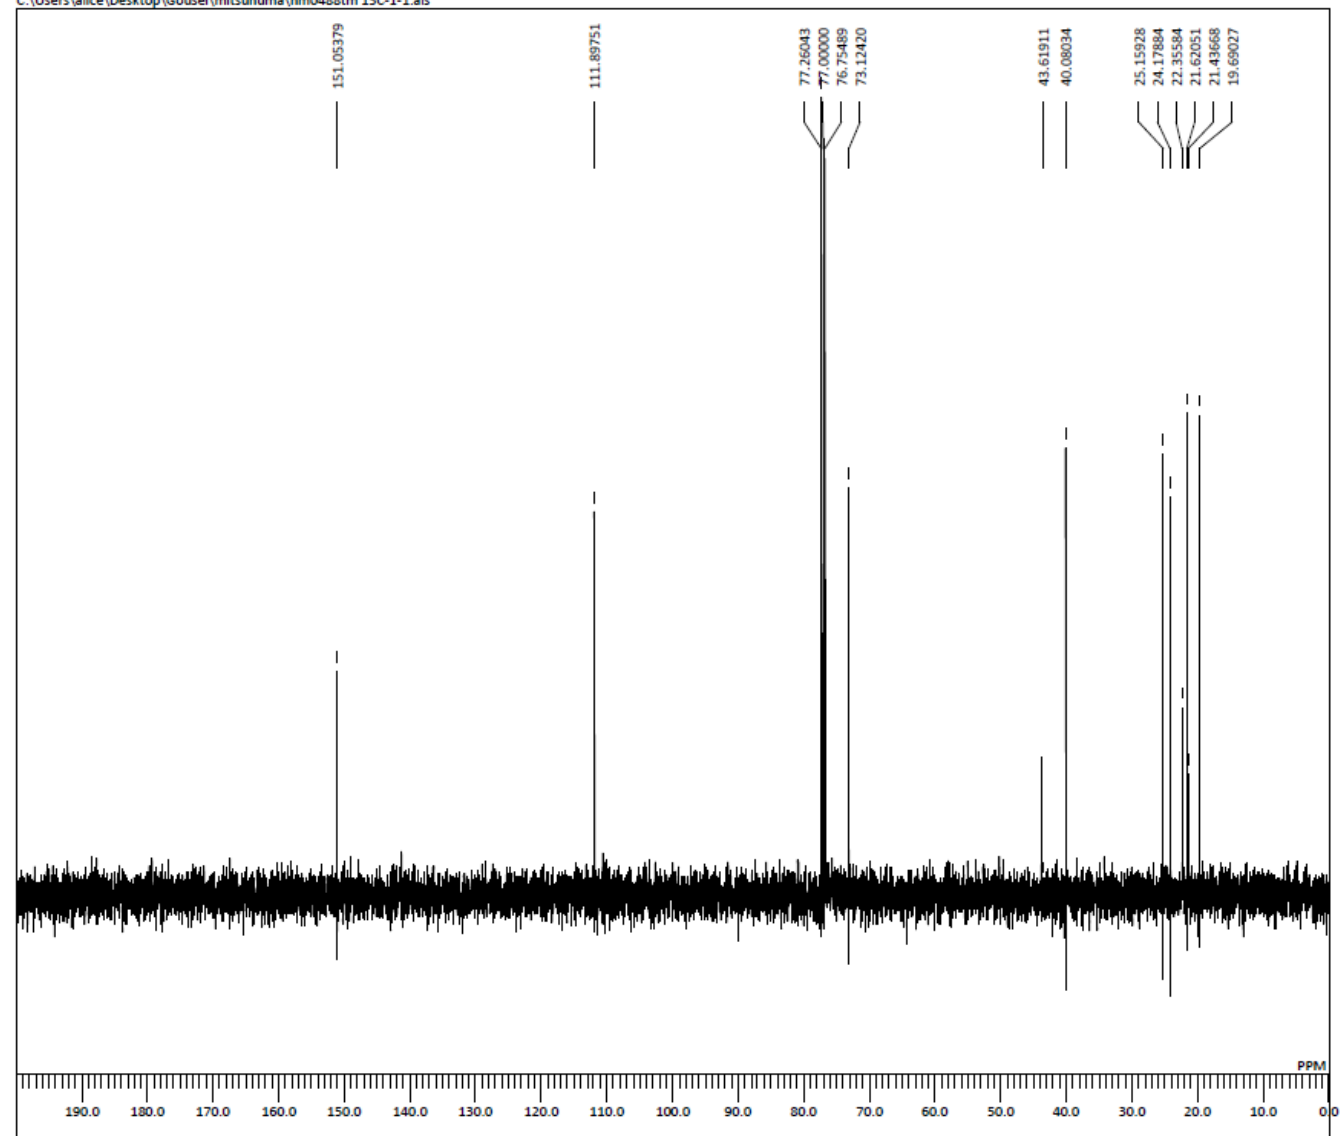

DFILE hm0488tm 13C-1-1.als  
 COMMT  
 DATIM 2018-09-18 10:58:48  
 OBNUC 13C  
 EXMOD carbon.jpg  
 OBFREQ 125.77 MHz  
 OBSET 1.58 KHz  
 OBFIN 5.95 Hz  
 POINT 26214  
 FREQU 50505.05 Hz  
 SCANS 20  
 ACQTM 0.5190 sec  
 PD 2.0000 sec  
 PW1 3.40 usec  
 IRNUC 1H  
 CTEMP 21.3 c  
 SLVNT CDCL3  
 EXREF 77.00 ppm  
 BF 0.12 Hz  
 RGAIN 60

H:\NMR\Mitsunuma\Allylation\ECS400data\st079product1-1H-1-1.als

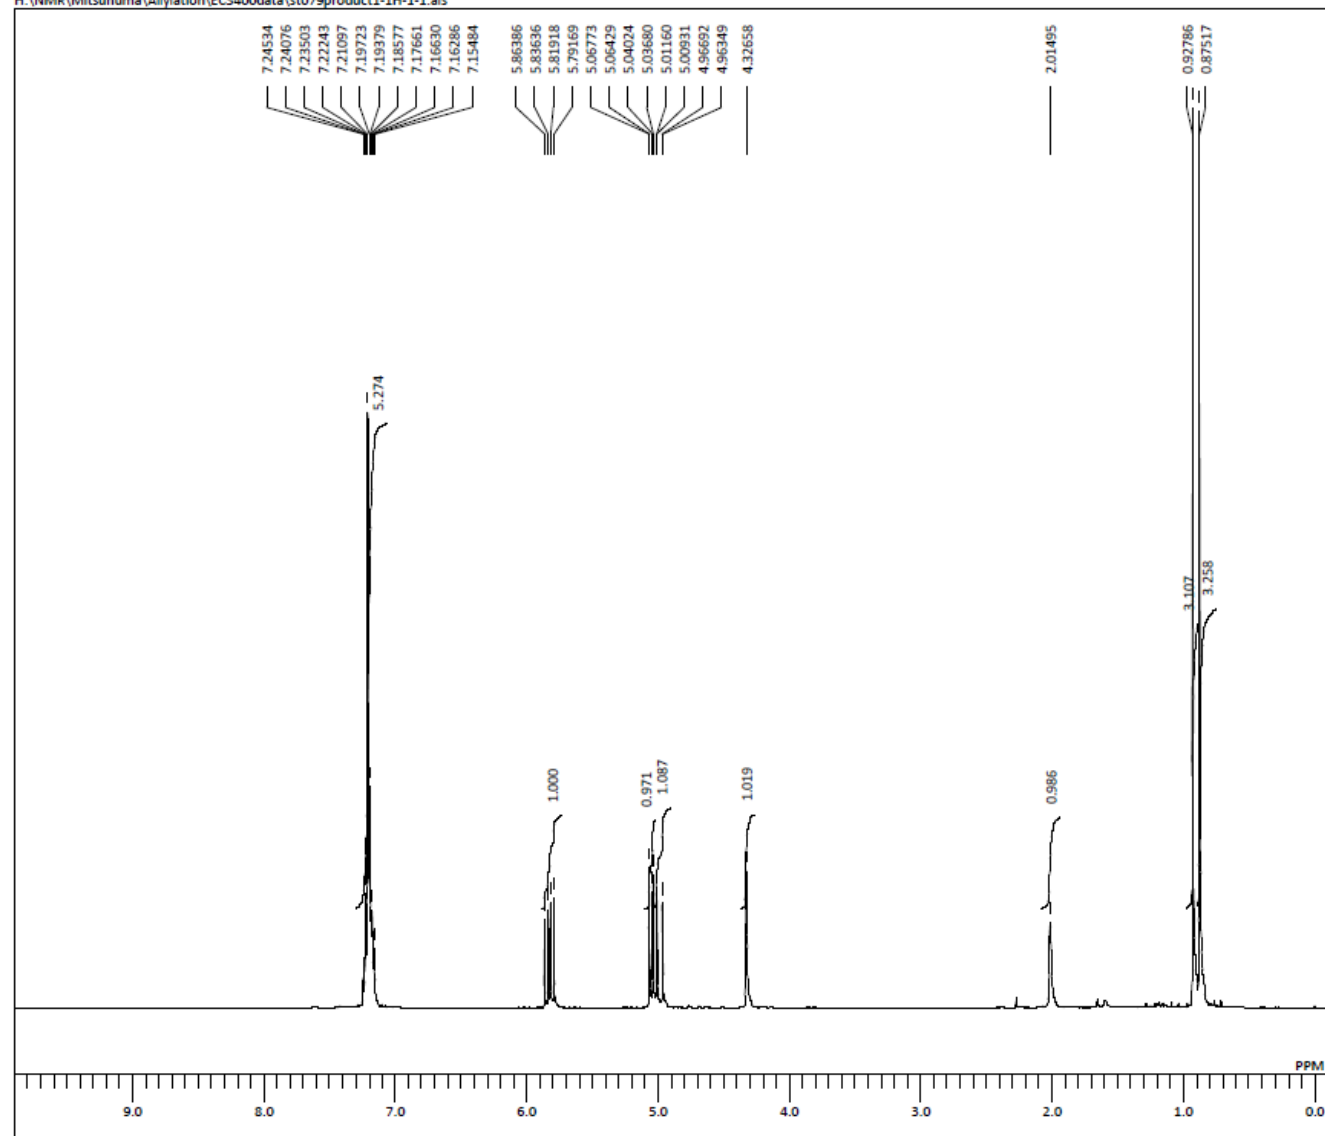

DFILE st079product1-1H-1-1.als  
 COMMT  
 DATIM 01-10-2018 21:37:08  
 OBNUC 1H  
 EXMOD proton.jpg  
 OBFREQ 391.78 MHz  
 OBSET 8.51 KHz  
 OBFIN 3.34 Hz  
 POINT 13107  
 FREQU 5882.35 Hz  
 SCANS 8  
 ACQTM 2.2282 sec  
 PD 5.0000 sec  
 PW1 5.22 usec  
 IRNUC 1H  
 CTEMP 21.1 c  
 SLVNT CDCL3  
 EXREF 0.00 ppm  
 BF 0.12 Hz  
 RGAIN 22

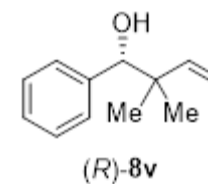

H:\NMR\Mitsunuma\Allylation\ECS400data\st079product1-13C-1-1.als

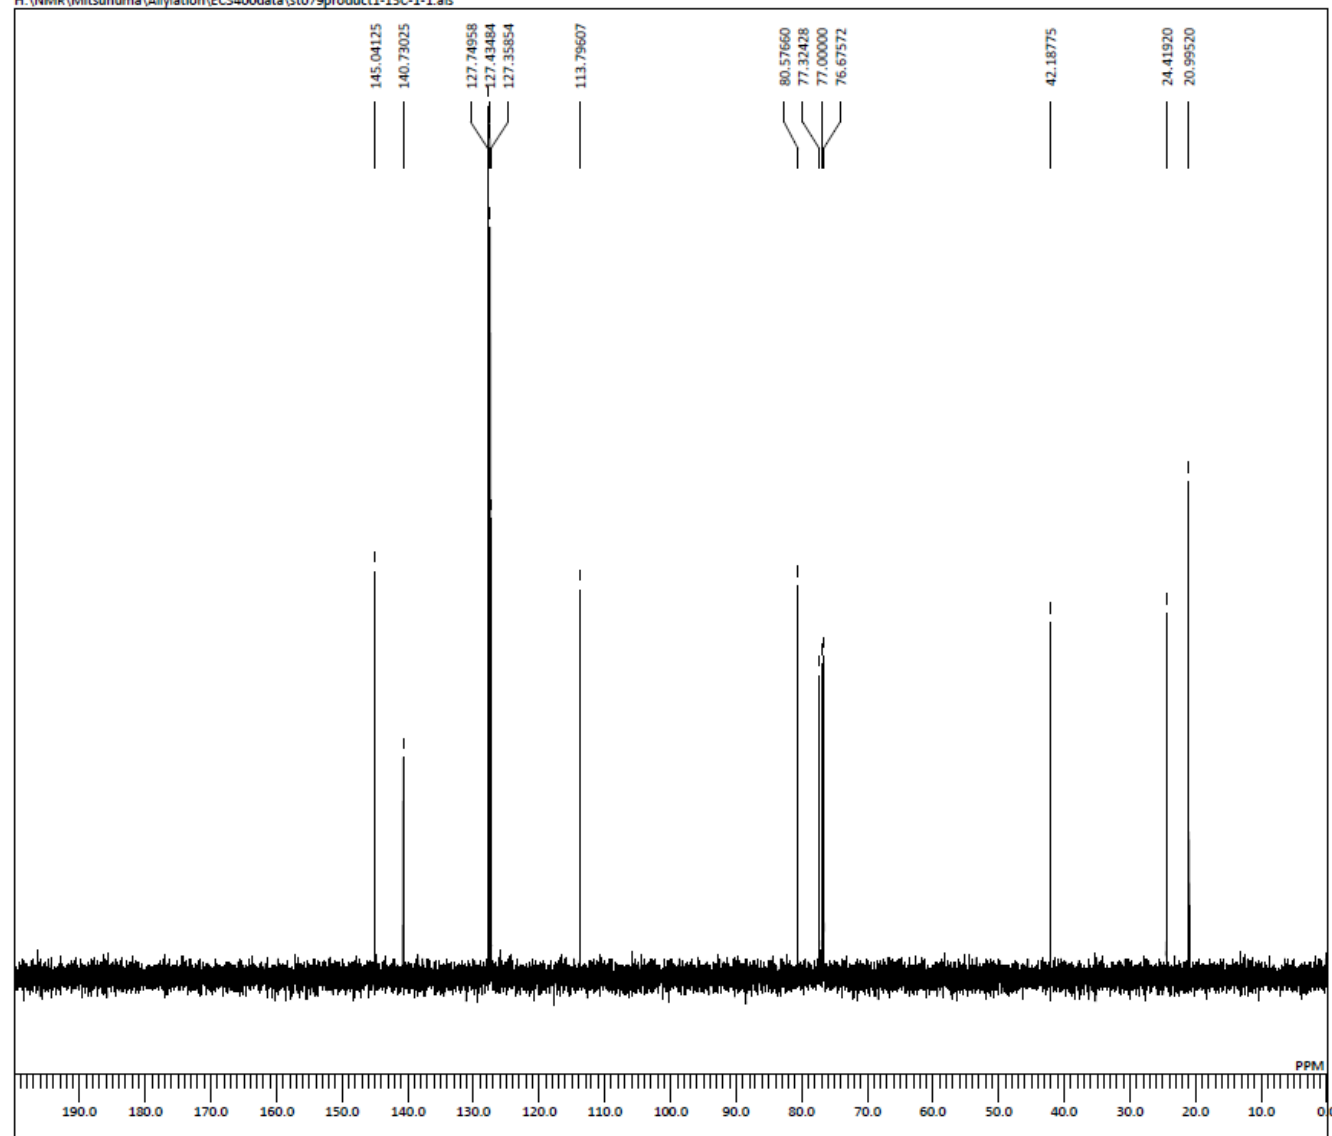

DFILE st079product1-13C-1-1.als  
 COMMT  
 DATIM 01-10-2018 21:33:30  
 OBNUC 13C  
 EXMOD carbon.jpg  
 OBFREQ 98.52 MHz  
 OBSET 4.64 kHz  
 OBFIN 8.74 Hz  
 POINT 26214  
 FREQU 24630.54 Hz  
 SCANS 32  
 ACQTM 1.0643 sec  
 PD 2.0000 sec  
 PW1 3.12 usec  
 IRNUC 1H  
 CTEMP 21.1 c  
 SLVNT CDCL3  
 EXREF 77.00 ppm  
 BF 0.12 Hz  
 RGAIN 60
